# Supplementary material
Source: publisher figshare collection journal article supplement (https://gsapubs.figshare.com/ndownloader/files/38910582)
Supplement: Supplementary file 1 [file 38910582]

## Sheet: G50623
Li, L., et al., 2023, In situ Raman observations reveal that the gas fluxes of diffuse flow in hydrothermal systems are greatly underestimated: Geology, https://doi.org/10.1130/G50623.1

## Sheet: Site 1-1
Raman shift (cm-1)	count
0	754.482
0.3	738.65
0.6	725.216
0.9	714.414
1.2	706.403
1.5	701.264
1.8	699.002
2.1	699.554
2.4	702.791
2.7	708.529
3	716.537
3.3	726.547
3.6	738.26
3.9	751.363
4.2	765.531
4.5	780.439
4.8	795.77
5.1	811.217
5.4	826.493
5.7	841.334
6	855.499
6.3	868.775
6.6	880.977
6.9	891.948
7.2	901.561
7.5	909.716
7.8	916.341
8.1	921.392
8.4	924.849
8.7	926.723
9	927.046
9.3	925.878
9.6	923.303
9.9	919.427
10.2	914.381
10.5	908.318
10.8	901.408
11.1	893.84
11.4	885.818
11.7	877.556
12	869.275
12.3	861.2
12.6	853.551
12.9	846.544
13.2	840.382
13.5	835.252
13.8	831.319
14.1	828.724
14.4	827.578
14.7	827.961
15	829.923
15.3	833.478
15.6	838.608
15.9	845.26
16.2	853.353
16.5	862.778
16.8	873.398
17.1	885.058
17.4	897.582
17.7	910.783
18	924.462
18.3	938.414
18.6	952.433
18.9	966.313
19.2	979.852
19.5	992.855
19.8	1005.14
20.1	1016.52
20.4	1026.85
20.7	1035.98
21	1043.79
21.3	1050.17
21.6	1055.03
21.9	1058.31
22.2	1059.98
22.5	1060.02
22.8	1058.46
23.1	1055.34
23.4	1050.73
23.7	1044.75
24	1037.5
24.3	1029.16
24.6	1019.9
24.9	1009.9
25.2	999.375
25.5	988.537
25.8	977.599
26.1	966.77
26.4	956.249
26.7	946.214
27	936.821
27.3	928.2
27.6	920.445
27.9	913.62
28.2	907.75
28.5	902.83
28.8	898.82
29.1	895.655
29.4	893.247
29.7	891.494
30	890.286
30.3	889.514
30.6	889.077
30.9	888.891
31.2	888.893
31.5	889.049
31.8	889.356
32.1	889.842
32.4	890.57
32.7	891.629
33	893.131
33.3	895.209
33.6	898
33.9	901.642
34.2	906.261
34.5	911.963
34.8	918.822
35.1	926.872
35.4	936.102
35.7	946.453
36	957.81
36.3	970.013
36.6	982.85
36.9	996.072
37.2	1009.4
37.5	1022.53
37.8	1035.17
38.1	1047
38.4	1057.76
38.7	1067.2
39	1075.13
39.3	1081.41
39.6	1085.96
39.9	1088.78
40.2	1089.95
40.5	1089.6
40.8	1087.93
41.1	1085.19
41.4	1081.69
41.7	1077.76
42	1073.73
42.3	1069.94
42.6	1066.72
42.9	1064.34
43.2	1063.05
43.5	1063.01
43.8	1064.33
44.1	1067.03
44.4	1071.06
44.7	1076.3
45	1082.54
45.3	1089.52
45.6	1096.92
45.9	1104.4
46.2	1111.57
46.5	1118.06
46.8	1123.51
47.1	1127.57
47.4	1129.94
47.7	1130.38
48	1128.72
48.3	1124.85
48.6	1118.74
48.9	1110.45
49.2	1100.11
49.5	1087.91
49.8	1074.12
50.1	1059.05
50.4	1043.06
50.7	1026.54
51	1009.87
51.3	993.476
51.6	977.734
51.9	963.013
52.2	949.648
52.5	937.931
52.8	928.107
53.1	920.368
53.4	914.85
53.7	911.634
54	910.749
54.3	912.168
54.6	915.819
54.9	921.588
55.2	929.319
55.5	938.829
55.8	949.906
56.1	962.319
56.4	975.821
56.7	990.155
57	1005.06
57.3	1020.28
57.6	1035.54
57.9	1050.6
58.2	1065.22
58.5	1079.16
58.8	1092.2
59.1	1104.16
59.4	1114.86
59.7	1124.14
60	1131.89
60.3	1138.01
60.6	1142.45
60.9	1145.17
61.2	1146.19
61.5	1145.55
61.8	1143.35
62.1	1139.7
62.4	1134.75
62.7	1128.71
63	1121.77
63.3	1114.19
63.6	1106.2
63.9	1098.08
64.2	1090.1
64.5	1082.5
64.8	1075.55
65.1	1069.45
65.4	1064.42
65.7	1060.6
66	1058.13
66.3	1057.09
66.6	1057.5
66.9	1059.37
67.2	1062.64
67.5	1067.22
67.8	1072.98
68.1	1079.76
68.4	1087.38
68.7	1095.66
69	1104.4
69.3	1113.39
69.6	1122.47
69.9	1131.48
70.2	1140.27
70.5	1148.74
70.8	1156.83
71.1	1164.49
71.4	1171.72
71.7	1178.55
72	1185.05
72.3	1191.27
72.6	1197.32
72.9	1203.28
73.2	1209.24
73.5	1215.28
73.8	1221.46
74.1	1227.8
74.4	1234.3
74.7	1240.92
75	1247.59
75.3	1254.2
75.6	1260.61
75.9	1266.66
76.2	1272.15
76.5	1276.89
76.8	1280.7
77.1	1283.4
77.4	1284.83
77.7	1284.87
78	1283.45
78.3	1280.54
78.6	1276.17
78.9	1270.43
79.2	1263.46
79.5	1255.46
79.8	1246.68
80.1	1237.42
80.4	1227.97
80.7	1218.69
81	1209.9
81.3	1201.92
81.6	1195.06
81.9	1189.57
82.2	1185.68
82.5	1183.54
82.8	1183.25
83.1	1184.84
83.4	1188.28
83.7	1193.48
84	1200.3
84.3	1208.56
84.6	1218.02
84.9	1228.46
85.2	1239.62
85.5	1251.27
85.8	1263.18
86.1	1275.15
86.4	1287.03
86.7	1298.7
87	1310.08
87.3	1321.16
87.6	1331.94
87.9	1342.47
88.2	1352.84
88.5	1363.13
88.8	1373.45
89.1	1383.89
89.4	1394.52
89.7	1405.41
90	1416.56
90.3	1427.96
90.6	1439.52
90.9	1451.13
91.2	1462.63
91.5	1473.83
91.8	1484.5
92.1	1494.4
92.4	1503.28
92.7	1510.89
93	1517.02
93.3	1521.48
93.6	1524.14
93.9	1524.9
94.2	1523.75
94.5	1520.75
94.8	1516.01
95.1	1509.72
95.4	1502.16
95.7	1493.63
96	1484.5
96.3	1475.18
96.6	1466.1
96.9	1457.7
97.2	1450.41
97.5	1444.67
97.8	1440.85
98.1	1439.32
98.4	1440.38
98.7	1444.29
99	1451.24
99.3	1461.38
99.6	1474.79
99.9	1491.5
100.2	1511.48
100.5	1534.69
100.8	1561.01
101.1	1590.34
101.4	1622.54
101.7	1657.45
102	1694.93
102.3	1734.84
102.6	1777.03
102.9	1821.4
103.2	1867.85
103.5	1916.29
103.8	1966.68
104.1	2018.98
104.4	2073.2
104.7	2129.34
105	2187.46
105.3	2247.63
105.6	2309.92
105.9	2374.46
106.2	2441.38
106.5	2510.82
106.8	2582.98
107.1	2658.03
107.4	2736.19
107.7	2817.69
108	2902.76
108.3	2991.68
108.6	3084.69
108.9	3182.07
109.2	3284.08
109.5	3390.99
109.8	3503.05
110.1	3620.48
110.4	3743.49
110.7	3872.26
111	4006.92
111.3	4147.55
111.6	4294.19
111.9	4446.83
112.2	4605.36
112.5	4769.66
112.8	4939.49
113.1	5114.58
113.4	5294.58
113.7	5479.06
114	5667.53
114.3	5859.47
114.6	6054.26
114.9	6251.26
115.2	6449.78
115.5	6649.09
115.8	6848.44
116.1	7047.05
116.4	7244.13
116.7	7438.91
117	7630.59
117.3	7818.42
117.6	8001.65
117.9	8179.58
118.2	8351.53
118.5	8516.89
118.8	8675.09
119.1	8825.63
119.4	8968.08
119.7	9102.06
120	9227.28
120.3	9343.53
120.6	9450.65
120.9	9548.59
121.2	9637.34
121.5	9716.98
121.8	9787.63
122.1	9849.5
122.4	9902.82
122.7	9947.88
123	9984.99
123.3	10014.5
123.6	10036.8
123.9	10052.3
124.2	10061.3
124.5	10064.2
124.8	10061.4
125.1	10053.2
125.4	10040
125.7	10022.1
126	9999.75
126.3	9973.29
126.6	9942.95
126.9	9908.97
127.2	9871.58
127.5	9830.98
127.8	9787.38
128.1	9740.97
128.4	9691.96
128.7	9640.54
129	9586.91
129.3	9531.29
129.6	9473.89
129.9	9414.94
130.2	9354.67
130.5	9293.34
130.8	9231.19
131.1	9168.48
131.4	9105.48
131.7	9042.45
132	8979.65
132.3	8917.35
132.6	8855.79
132.9	8795.22
133.2	8735.87
133.5	8677.94
133.8	8621.64
134.1	8567.16
134.4	8514.64
134.7	8464.22
135	8416.04
135.3	8370.17
135.6	8326.69
135.9	8285.65
136.2	8247.09
136.5	8211
136.8	8177.38
137.1	8146.2
137.4	8117.4
137.7	8090.93
138	8066.71
138.3	8044.64
138.6	8024.63
138.9	8006.56
139.2	7990.31
139.5	7975.78
139.8	7962.83
140.1	7951.35
140.4	7941.21
140.7	7932.29
141	7924.48
141.3	7917.67
141.6	7911.76
141.9	7906.66
142.2	7902.27
142.5	7898.51
142.8	7895.31
143.1	7892.61
143.4	7890.33
143.7	7888.41
144	7886.8
144.3	7885.45
144.6	7884.31
144.9	7883.31
145.2	7882.42
145.5	7881.59
145.8	7880.75
146.1	7879.88
146.4	7878.92
146.7	7877.83
147	7876.57
147.3	7875.11
147.6	7873.42
147.9	7871.48
148.2	7869.29
148.5	7866.84
148.8	7864.14
149.1	7861.21
149.4	7858.08
149.7	7854.78
150	7851.37
150.3	7847.9
150.6	7844.43
150.9	7841.02
151.2	7837.73
151.5	7834.63
151.8	7831.77
152.1	7829.22
152.4	7827.01
152.7	7825.19
153	7823.78
153.3	7822.81
153.6	7822.28
153.9	7822.18
154.2	7822.52
154.5	7823.27
154.8	7824.4
155.1	7825.89
155.4	7827.72
155.7	7829.85
156	7832.26
156.3	7834.93
156.6	7837.86
156.9	7841.04
157.2	7844.48
157.5	7848.2
157.8	7852.24
158.1	7856.62
158.4	7861.4
158.7	7866.63
159	7872.36
159.3	7878.65
159.6	7885.54
159.9	7893.09
160.2	7901.32
160.5	7910.26
160.8	7919.92
161.1	7930.28
161.4	7941.3
161.7	7952.94
162	7965.12
162.3	7977.75
162.6	7990.71
162.9	8003.87
163.2	8017.09
163.5	8030.19
163.8	8043.02
164.1	8055.38
164.4	8067.12
164.7	8078.05
165	8088
165.3	8096.8
165.6	8104.31
165.9	8110.38
166.2	8114.9
166.5	8117.76
166.8	8118.87
167.1	8118.18
167.4	8115.63
167.7	8111.21
168	8104.9
168.3	8096.73
168.6	8086.71
168.9	8074.89
169.2	8061.35
169.5	8046.14
169.8	8029.37
170.1	8011.13
170.4	7991.53
170.7	7970.67
171	7948.7
171.3	7925.73
171.6	7901.9
171.9	7877.34
172.2	7852.19
172.5	7826.57
172.8	7800.63
173.1	7774.5
173.4	7748.28
173.7	7722.11
174	7696.09
174.3	7670.32
174.6	7644.88
174.9	7619.86
175.2	7595.31
175.5	7571.28
175.8	7547.83
176.1	7524.97
176.4	7502.72
176.7	7481.09
177	7460.08
177.3	7439.66
177.6	7419.84
177.9	7400.58
178.2	7381.85
178.5	7363.64
178.8	7345.91
179.1	7328.64
179.4	7311.79
179.7	7295.35
180	7279.3
180.3	7263.6
180.6	7248.25
180.9	7233.22
181.2	7218.5
181.5	7204.07
181.8	7189.92
182.1	7176.01
182.4	7162.34
182.7	7148.87
183	7135.57
183.3	7122.42
183.6	7109.38
183.9	7096.4
184.2	7083.46
184.5	7070.5
184.8	7057.48
185.1	7044.37
185.4	7031.12
185.7	7017.69
186	7004.06
186.3	6990.18
186.6	6976.04
186.9	6961.61
187.2	6946.89
187.5	6931.87
187.8	6916.54
188.1	6900.9
188.4	6884.97
188.7	6868.76
189	6852.27
189.3	6835.53
189.6	6818.55
189.9	6801.34
190.2	6783.93
190.5	6766.33
190.8	6748.54
191.1	6730.59
191.4	6712.48
191.7	6694.22
192	6675.82
192.3	6657.28
192.6	6638.61
192.9	6619.8
193.2	6600.88
193.5	6581.83
193.8	6562.68
194.1	6543.42
194.4	6524.07
194.7	6504.64
195	6485.14
195.3	6465.59
195.6	6446
195.9	6426.39
196.2	6406.76
196.5	6387.14
196.8	6367.55
197.1	6347.98
197.4	6328.46
197.7	6308.99
198	6289.59
198.3	6270.25
198.6	6250.98
198.9	6231.78
199.2	6212.66
199.5	6193.61
199.8	6174.64
200.1	6155.74
200.4	6136.9
200.7	6118.14
201	6099.45
201.3	6080.82
201.6	6062.27
201.9	6043.79
202.2	6025.38
202.5	6007.04
202.8	5988.78
203.1	5970.59
203.4	5952.49
203.7	5934.46
204	5916.5
204.3	5898.63
204.6	5880.82
204.9	5863.07
205.2	5845.39
205.5	5827.76
205.8	5810.17
206.1	5792.62
206.4	5775.1
206.7	5757.59
207	5740.1
207.3	5722.62
207.6	5705.14
207.9	5687.66
208.2	5670.17
208.5	5652.68
208.8	5635.19
209.1	5617.69
209.4	5600.2
209.7	5582.7
210	5565.21
210.3	5547.73
210.6	5530.24
210.9	5512.76
211.2	5495.28
211.5	5477.78
211.8	5460.27
212.1	5442.73
212.4	5425.15
212.7	5407.52
213	5389.82
213.3	5372.03
213.6	5354.14
213.9	5336.14
214.2	5318.02
214.5	5299.76
214.8	5281.36
215.1	5262.82
215.4	5244.15
215.7	5225.34
216	5206.41
216.3	5187.38
216.6	5168.26
216.9	5149.08
217.2	5129.87
217.5	5110.66
217.8	5091.48
218.1	5072.35
218.4	5053.32
218.7	5034.4
219	5015.64
219.3	4997.04
219.6	4978.64
219.9	4960.45
220.2	4942.49
220.5	4924.75
220.8	4907.25
221.1	4889.97
221.4	4872.92
221.7	4856.08
222	4839.44
222.3	4822.97
222.6	4806.66
222.9	4790.49
223.2	4774.42
223.5	4758.45
223.8	4742.54
224.1	4726.67
224.4	4710.82
224.7	4694.98
225	4679.13
225.3	4663.25
225.6	4647.35
225.9	4631.41
226.2	4615.44
226.5	4599.44
226.8	4583.41
227.1	4567.37
227.4	4551.33
227.7	4535.3
228	4519.31
228.3	4503.36
228.6	4487.48
228.9	4471.69
229.2	4456
229.5	4440.42
229.8	4424.98
230.1	4409.68
230.4	4394.52
230.7	4379.52
231	4364.67
231.3	4349.96
231.6	4335.39
231.9	4320.95
232.2	4306.63
232.5	4292.41
232.8	4278.28
233.1	4264.21
233.4	4250.19
233.7	4236.21
234	4222.26
234.3	4208.32
234.6	4194.38
234.9	4180.44
235.2	4166.5
235.5	4152.57
235.8	4138.64
236.1	4124.72
236.4	4110.83
236.7	4096.98
237	4083.17
237.3	4069.43
237.6	4055.76
237.9	4042.17
238.2	4028.68
238.5	4015.28
238.8	4001.98
239.1	3988.78
239.4	3975.67
239.7	3962.63
240	3949.68
240.3	3936.77
240.6	3923.92
240.9	3911.09
241.2	3898.27
241.5	3885.46
241.8	3872.64
242.1	3859.8
242.4	3846.93
242.7	3834.04
243	3821.12
243.3	3808.19
243.6	3795.25
243.9	3782.31
244.2	3769.39
244.5	3756.5
244.8	3743.66
245.1	3730.89
245.4	3718.19
245.7	3705.59
246	3693.08
246.3	3680.68
246.6	3668.39
246.9	3656.21
247.2	3644.12
247.5	3632.13
247.8	3620.22
248.1	3608.38
248.4	3596.6
248.7	3584.85
249	3573.13
249.3	3561.43
249.6	3549.73
249.9	3538.03
250.2	3526.32
250.5	3514.61
250.8	3502.9
251.1	3491.2
251.4	3479.52
251.7	3467.87
252	3456.27
252.3	3444.73
252.6	3433.27
252.9	3421.91
253.2	3410.65
253.5	3399.51
253.8	3388.48
254.1	3377.57
254.4	3366.77
254.7	3356.09
255	3345.49
255.3	3334.98
255.6	3324.52
255.9	3314.11
256.2	3303.71
256.5	3293.3
256.8	3282.87
257.1	3272.39
257.4	3261.86
257.7	3251.25
258	3240.56
258.3	3229.79
258.6	3218.94
258.9	3208.01
259.2	3197.03
259.5	3185.99
259.8	3174.92
260.1	3163.84
260.4	3152.78
260.7	3141.74
261	3130.76
261.3	3119.85
261.6	3109.03
261.9	3098.31
262.2	3087.72
262.5	3077.25
262.8	3066.91
263.1	3056.71
263.4	3046.65
263.7	3036.72
264	3026.92
264.3	3017.25
264.6	3007.71
264.9	2998.28
265.2	2988.96
265.5	2979.76
265.8	2970.66
266.1	2961.67
266.4	2952.78
266.7	2943.99
267	2935.3
267.3	2926.72
267.6	2918.23
267.9	2909.84
268.2	2901.53
268.5	2893.31
268.8	2885.16
269.1	2877.07
269.4	2869.02
269.7	2861
270	2852.99
270.3	2844.96
270.6	2836.9
270.9	2828.78
271.2	2820.58
271.5	2812.29
271.8	2803.89
272.1	2795.38
272.4	2786.73
272.7	2777.96
273	2769.07
273.3	2760.06
273.6	2750.96
273.9	2741.78
274.2	2732.54
274.5	2723.27
274.8	2714
275.1	2704.75
275.4	2695.56
275.7	2686.45
276	2677.45
276.3	2668.57
276.6	2659.83
276.9	2651.24
277.2	2642.8
277.5	2634.5
277.8	2626.35
278.1	2618.33
278.4	2610.42
278.7	2602.6
279	2594.84
279.3	2587.12
279.6	2579.41
279.9	2571.7
280.2	2563.96
280.5	2556.17
280.8	2548.32
281.1	2540.41
281.4	2532.44
281.7	2524.39
282	2516.3
282.3	2508.16
282.6	2500
282.9	2491.83
283.2	2483.68
283.5	2475.58
283.8	2467.54
284.1	2459.58
284.4	2451.73
284.7	2444
285	2436.4
285.3	2428.95
285.6	2421.64
285.9	2414.47
286.2	2407.45
286.5	2400.55
286.8	2393.77
287.1	2387.1
287.4	2380.51
287.7	2374
288	2367.55
288.3	2361.14
288.6	2354.75
288.9	2348.39
289.2	2342.04
289.5	2335.69
289.8	2329.35
290.1	2323.02
290.4	2316.69
290.7	2310.37
291	2304.08
291.3	2297.81
291.6	2291.59
291.9	2285.4
292.2	2279.27
292.5	2273.21
292.8	2267.21
293.1	2261.28
293.4	2255.42
293.7	2249.64
294	2243.94
294.3	2238.3
294.6	2232.73
294.9	2227.23
295.2	2221.77
295.5	2216.36
295.8	2210.99
296.1	2205.65
296.4	2200.32
296.7	2195
297	2189.67
297.3	2184.33
297.6	2178.96
297.9	2173.56
298.2	2168.11
298.5	2162.61
298.8	2157.04
299.1	2151.41
299.4	2145.7
299.7	2139.92
300	2134.06
300.3	2128.14
300.6	2122.15
300.9	2116.1
301.2	2110.01
301.5	2103.9
301.8	2097.78
302.1	2091.68
302.4	2085.62
302.7	2079.64
303	2073.75
303.3	2067.99
303.6	2062.38
303.9	2056.95
304.2	2051.72
304.5	2046.72
304.8	2041.95
305.1	2037.42
305.4	2033.14
305.7	2029.12
306	2025.33
306.3	2021.76
306.6	2018.41
306.9	2015.25
307.2	2012.25
307.5	2009.38
307.8	2006.63
308.1	2003.95
308.4	2001.33
308.7	1998.74
309	1996.16
309.3	1993.58
309.6	1990.97
309.9	1988.35
310.2	1985.69
310.5	1983.01
310.8	1980.32
311.1	1977.61
311.4	1974.91
311.7	1972.23
312	1969.58
312.3	1966.97
312.6	1964.43
312.9	1961.96
313.2	1959.57
313.5	1957.26
313.8	1955.04
314.1	1952.9
314.4	1950.84
314.7	1948.84
315	1946.91
315.3	1945.01
315.6	1943.15
315.9	1941.3
316.2	1939.46
316.5	1937.6
316.8	1935.71
317.1	1933.8
317.4	1931.84
317.7	1929.85
318	1927.81
318.3	1925.73
318.6	1923.61
318.9	1921.46
319.2	1919.3
319.5	1917.12
319.8	1914.94
320.1	1912.77
320.4	1910.61
320.7	1908.48
321	1906.38
321.3	1904.32
321.6	1902.3
321.9	1900.32
322.2	1898.38
322.5	1896.49
322.8	1894.63
323.1	1892.81
323.4	1891.03
323.7	1889.28
324	1887.57
324.3	1885.88
324.6	1884.22
324.9	1882.59
325.2	1881
325.5	1879.44
325.8	1877.91
326.1	1876.43
326.4	1874.99
326.7	1873.61
327	1872.27
327.3	1870.99
327.6	1869.77
327.9	1868.6
328.2	1867.49
328.5	1866.43
328.8	1865.41
329.1	1864.44
329.4	1863.51
329.7	1862.61
330	1861.73
330.3	1860.86
330.6	1860.01
330.9	1859.15
331.2	1858.3
331.5	1857.43
331.8	1856.56
332.1	1855.68
332.4	1854.78
332.7	1853.87
333	1852.96
333.3	1852.04
333.6	1851.12
333.9	1850.2
334.2	1849.29
334.5	1848.39
334.8	1847.5
335.1	1846.63
335.4	1845.77
335.7	1844.93
336	1844.11
336.3	1843.31
336.6	1842.52
336.9	1841.75
337.2	1840.98
337.5	1840.23
337.8	1839.49
338.1	1838.77
338.4	1838.05
338.7	1837.35
339	1836.66
339.3	1836
339.6	1835.36
339.9	1834.76
340.2	1834.19
340.5	1833.67
340.8	1833.2
341.1	1832.77
341.4	1832.4
341.7	1832.08
342	1831.8
342.3	1831.57
342.6	1831.38
342.9	1831.21
343.2	1831.05
343.5	1830.9
343.8	1830.73
344.1	1830.53
344.4	1830.3
344.7	1830
345	1829.65
345.3	1829.23
345.6	1828.74
345.9	1828.18
346.2	1827.57
346.5	1826.9
346.8	1826.2
347.1	1825.49
347.4	1824.8
347.7	1824.14
348	1823.55
348.3	1823.06
348.6	1822.7
348.9	1822.48
349.2	1822.44
349.5	1822.58
349.8	1822.92
350.1	1823.47
350.4	1824.21
350.7	1825.15
351	1826.27
351.3	1827.53
351.6	1828.92
351.9	1830.4
352.2	1831.92
352.5	1833.46
352.8	1834.96
353.1	1836.4
353.4	1837.74
353.7	1838.94
354	1839.97
354.3	1840.82
354.6	1841.48
354.9	1841.93
355.2	1842.19
355.5	1842.26
355.8	1842.16
356.1	1841.91
356.4	1841.54
356.7	1841.08
357	1840.57
357.3	1840.03
357.6	1839.52
357.9	1839.05
358.2	1838.66
358.5	1838.38
358.8	1838.21
359.1	1838.19
359.4	1838.31
359.7	1838.59
360	1839.01
360.3	1839.57
360.6	1840.26
360.9	1841.06
361.2	1841.95
361.5	1842.9
361.8	1843.91
362.1	1844.93
362.4	1845.95
362.7	1846.95
363	1847.9
363.3	1848.8
363.6	1849.62
363.9	1850.36
364.2	1851.01
364.5	1851.56
364.8	1852.02
365.1	1852.4
365.4	1852.68
365.7	1852.9
366	1853.05
366.3	1853.14
366.6	1853.2
366.9	1853.23
367.2	1853.25
367.5	1853.28
367.8	1853.32
368.1	1853.4
368.4	1853.51
368.7	1853.67
369	1853.89
369.3	1854.18
369.6	1854.53
369.9	1854.95
370.2	1855.43
370.5	1855.98
370.8	1856.59
371.1	1857.25
371.4	1857.96
371.7	1858.7
372	1859.46
372.3	1860.24
372.6	1861.01
372.9	1861.78
373.2	1862.53
373.5	1863.25
373.8	1863.92
374.1	1864.55
374.4	1865.13
374.7	1865.64
375	1866.09
375.3	1866.48
375.6	1866.81
375.9	1867.07
376.2	1867.27
376.5	1867.42
376.8	1867.51
377.1	1867.56
377.4	1867.58
377.7	1867.57
378	1867.53
378.3	1867.49
378.6	1867.44
378.9	1867.4
379.2	1867.37
379.5	1867.38
379.8	1867.41
380.1	1867.48
380.4	1867.6
380.7	1867.78
381	1868.01
381.3	1868.3
381.6	1868.66
381.9	1869.07
382.2	1869.54
382.5	1870.07
382.8	1870.65
383.1	1871.27
383.4	1871.93
383.7	1872.6
384	1873.29
384.3	1873.98
384.6	1874.66
384.9	1875.32
385.2	1875.94
385.5	1876.53
385.8	1877.06
386.1	1877.55
386.4	1877.98
386.7	1878.36
387	1878.7
387.3	1878.99
387.6	1879.26
387.9	1879.51
388.2	1879.75
388.5	1880.01
388.8	1880.3
389.1	1880.63
389.4	1881.03
389.7	1881.51
390	1882.07
390.3	1882.74
390.6	1883.51
390.9	1884.4
391.2	1885.41
391.5	1886.52
391.8	1887.74
392.1	1889.05
392.4	1890.44
392.7	1891.91
393	1893.42
393.3	1894.97
393.6	1896.53
393.9	1898.1
394.2	1899.64
394.5	1901.16
394.8	1902.62
395.1	1904.02
395.4	1905.36
395.7	1906.61
396	1907.79
396.3	1908.87
396.6	1909.86
396.9	1910.77
397.2	1911.58
397.5	1912.3
397.8	1912.93
398.1	1913.47
398.4	1913.93
398.7	1914.31
399	1914.6
399.3	1914.81
399.6	1914.95
399.9	1915.02
400.2	1915.01
400.5	1914.95
400.8	1914.83
401.1	1914.67
401.4	1914.48
401.7	1914.28
402	1914.08
402.3	1913.9
402.6	1913.77
402.9	1913.69
403.2	1913.71
403.5	1913.82
403.8	1914.07
404.1	1914.45
404.4	1915
404.7	1915.7
405	1916.58
405.3	1917.64
405.6	1918.86
405.9	1920.23
406.2	1921.75
406.5	1923.4
406.8	1925.15
407.1	1926.98
407.4	1928.87
407.7	1930.81
408	1932.76
408.3	1934.73
408.6	1936.7
408.9	1938.69
409.2	1940.7
409.5	1942.75
409.8	1944.88
410.1	1947.13
410.4	1949.55
410.7	1952.2
411	1955.13
411.3	1958.43
411.6	1962.14
411.9	1966.34
412.2	1971.07
412.5	1976.39
412.8	1982.31
413.1	1988.86
413.4	1996.03
413.7	2003.8
414	2012.11
414.3	2020.89
414.6	2030.04
414.9	2039.47
415.2	2049.02
415.5	2058.56
415.8	2067.92
416.1	2076.94
416.4	2085.44
416.7	2093.26
417	2100.25
417.3	2106.25
417.6	2111.14
417.9	2114.81
418.2	2117.2
418.5	2118.24
418.8	2117.91
419.1	2116.24
419.4	2113.25
419.7	2109.03
420	2103.66
420.3	2097.28
420.6	2090.02
420.9	2082.04
421.2	2073.51
421.5	2064.6
421.8	2055.49
422.1	2046.36
422.4	2037.35
422.7	2028.63
423	2020.31
423.3	2012.52
423.6	2005.35
423.9	1998.87
424.2	1993.12
424.5	1988.12
424.8	1983.9
425.1	1980.42
425.4	1977.66
425.7	1975.56
426	1974.08
426.3	1973.14
426.6	1972.67
426.9	1972.59
427.2	1972.83
427.5	1973.3
427.8	1973.94
428.1	1974.68
428.4	1975.45
428.7	1976.21
429	1976.91
429.3	1977.5
429.6	1977.97
429.9	1978.28
430.2	1978.44
430.5	1978.42
430.8	1978.22
431.1	1977.86
431.4	1977.34
431.7	1976.67
432	1975.88
432.3	1974.96
432.6	1973.96
432.9	1972.89
433.2	1971.77
433.5	1970.63
433.8	1969.49
434.1	1968.38
434.4	1967.31
434.7	1966.31
435	1965.4
435.3	1964.6
435.6	1963.93
435.9	1963.39
436.2	1963
436.5	1962.77
436.8	1962.7
437.1	1962.79
437.4	1963.04
437.7	1963.44
438	1963.98
438.3	1964.65
438.6	1965.43
438.9	1966.31
439.2	1967.27
439.5	1968.28
439.8	1969.32
440.1	1970.38
440.4	1971.43
440.7	1972.46
441	1973.44
441.3	1974.38
441.6	1975.26
441.9	1976.07
442.2	1976.81
442.5	1977.49
442.8	1978.12
443.1	1978.69
443.4	1979.23
443.7	1979.75
444	1980.25
444.3	1980.76
444.6	1981.3
444.9	1981.86
445.2	1982.47
445.5	1983.13
445.8	1983.84
446.1	1984.59
446.4	1985.4
446.7	1986.24
447	1987.1
447.3	1987.96
447.6	1988.81
447.9	1989.61
448.2	1990.35
448.5	1991
448.8	1991.54
449.1	1991.95
449.4	1992.21
449.7	1992.3
450	1992.22
450.3	1991.97
450.6	1991.55
450.9	1990.96
451.2	1990.22
451.5	1989.35
451.8	1988.38
452.1	1987.32
452.4	1986.21
452.7	1985.08
453	1983.95
453.3	1982.86
453.6	1981.82
453.9	1980.87
454.2	1980.01
454.5	1979.26
454.8	1978.63
455.1	1978.1
455.4	1977.69
455.7	1977.37
456	1977.14
456.3	1976.96
456.6	1976.83
456.9	1976.71
457.2	1976.58
457.5	1976.42
457.8	1976.2
458.1	1975.91
458.4	1975.52
458.7	1975.04
459	1974.44
459.3	1973.73
459.6	1972.9
459.9	1971.98
460.2	1970.96
460.5	1969.86
460.8	1968.71
461.1	1967.51
461.4	1966.3
461.7	1965.1
462	1963.92
462.3	1962.79
462.6	1961.73
462.9	1960.75
463.2	1959.88
463.5	1959.11
463.8	1958.46
464.1	1957.92
464.4	1957.51
464.7	1957.21
465	1957.01
465.3	1956.91
465.6	1956.88
465.9	1956.93
466.2	1957.02
466.5	1957.14
466.8	1957.28
467.1	1957.4
467.4	1957.5
467.7	1957.56
468	1957.56
468.3	1957.48
468.6	1957.32
468.9	1957.07
469.2	1956.71
469.5	1956.25
469.8	1955.68
470.1	1955
470.4	1954.22
470.7	1953.36
471	1952.4
471.3	1951.38
471.6	1950.31
471.9	1949.2
472.2	1948.06
472.5	1946.93
472.8	1945.82
473.1	1944.76
473.4	1943.75
473.7	1942.82
474	1942
474.3	1941.28
474.6	1940.7
474.9	1940.25
475.2	1939.95
475.5	1939.8
475.8	1939.8
476.1	1939.95
476.4	1940.23
476.7	1940.64
477	1941.15
477.3	1941.76
477.6	1942.44
477.9	1943.16
478.2	1943.9
478.5	1944.62
478.8	1945.31
479.1	1945.93
479.4	1946.45
479.7	1946.85
480	1947.1
480.3	1947.19
480.6	1947.09
480.9	1946.81
481.2	1946.32
481.5	1945.64
481.8	1944.76
482.1	1943.69
482.4	1942.45
482.7	1941.05
483	1939.52
483.3	1937.89
483.6	1936.17
483.9	1934.41
484.2	1932.63
484.5	1930.87
484.8	1929.15
485.1	1927.51
485.4	1925.97
485.7	1924.55
486	1923.27
486.3	1922.16
486.6	1921.21
486.9	1920.44
487.2	1919.86
487.5	1919.44
487.8	1919.2
488.1	1919.11
488.4	1919.17
488.7	1919.35
489	1919.63
489.3	1919.99
489.6	1920.39
489.9	1920.83
490.2	1921.26
490.5	1921.66
490.8	1922.01
491.1	1922.28
491.4	1922.45
491.7	1922.49
492	1922.4
492.3	1922.15
492.6	1921.75
492.9	1921.18
493.2	1920.44
493.5	1919.55
493.8	1918.5
494.1	1917.31
494.4	1915.99
494.7	1914.56
495	1913.05
495.3	1911.47
495.6	1909.84
495.9	1908.2
496.2	1906.56
496.5	1904.95
496.8	1903.37
497.1	1901.86
497.4	1900.42
497.7	1899.06
498	1897.8
498.3	1896.62
498.6	1895.54
498.9	1894.55
499.2	1893.65
499.5	1892.83
499.8	1892.07
500.1	1891.39
500.4	1890.76
500.7	1890.18
501	1889.65
501.3	1889.16
501.6	1888.72
501.9	1888.31
502.2	1887.95
502.5	1887.63
502.8	1887.36
503.1	1887.15
503.4	1887
503.7	1886.9
504	1886.87
504.3	1886.9
504.6	1886.98
504.9	1887.11
505.2	1887.29
505.5	1887.49
505.8	1887.71
506.1	1887.93
506.4	1888.13
506.7	1888.3
507	1888.42
507.3	1888.47
507.6	1888.44
507.9	1888.33
508.2	1888.12
508.5	1887.83
508.8	1887.44
509.1	1886.97
509.4	1886.42
509.7	1885.82
510	1885.18
510.3	1884.51
510.6	1883.84
510.9	1883.19
511.2	1882.57
511.5	1882
511.8	1881.48
512.1	1881.03
512.4	1880.65
512.7	1880.33
513	1880.07
513.3	1879.85
513.6	1879.66
513.9	1879.48
514.2	1879.29
514.5	1879.07
514.8	1878.79
515.1	1878.43
515.4	1877.98
515.7	1877.42
516	1876.74
516.3	1875.94
516.6	1875.02
516.9	1873.98
517.2	1872.84
517.5	1871.61
517.8	1870.31
518.1	1868.97
518.4	1867.61
518.7	1866.25
519	1864.93
519.3	1863.67
519.6	1862.49
519.9	1861.41
520.2	1860.44
520.5	1859.59
520.8	1858.88
521.1	1858.28
521.4	1857.81
521.7	1857.44
522	1857.16
522.3	1856.95
522.6	1856.79
522.9	1856.66
523.2	1856.52
523.5	1856.35
523.8	1856.13
524.1	1855.83
524.4	1855.45
524.7	1854.96
525	1854.35
525.3	1853.62
525.6	1852.76
525.9	1851.78
526.2	1850.69
526.5	1849.51
526.8	1848.23
527.1	1846.89
527.4	1845.51
527.7	1844.1
528	1842.7
528.3	1841.32
528.6	1840
528.9	1838.74
529.2	1837.58
529.5	1836.52
529.8	1835.58
530.1	1834.78
530.4	1834.11
530.7	1833.58
531	1833.19
531.3	1832.94
531.6	1832.81
531.9	1832.79
532.2	1832.86
532.5	1833.01
532.8	1833.21
533.1	1833.44
533.4	1833.68
533.7	1833.9
534	1834.07
534.3	1834.18
534.6	1834.2
534.9	1834.12
535.2	1833.91
535.5	1833.57
535.8	1833.09
536.1	1832.46
536.4	1831.7
536.7	1830.79
537	1829.76
537.3	1828.61
537.6	1827.37
537.9	1826.06
538.2	1824.7
538.5	1823.32
538.8	1821.94
539.1	1820.59
539.4	1819.3
539.7	1818.08
540	1816.95
540.3	1815.95
540.6	1815.06
540.9	1814.32
541.2	1813.71
541.5	1813.23
541.8	1812.89
542.1	1812.67
542.4	1812.55
542.7	1812.53
543	1812.58
543.3	1812.68
543.6	1812.82
543.9	1812.97
544.2	1813.11
544.5	1813.23
544.8	1813.32
545.1	1813.35
545.4	1813.32
545.7	1813.23
546	1813.07
546.3	1812.85
546.6	1812.56
546.9	1812.22
547.2	1811.83
547.5	1811.4
547.8	1810.94
548.1	1810.46
548.4	1809.97
548.7	1809.49
549	1809.01
549.3	1808.55
549.6	1808.11
549.9	1807.69
550.2	1807.3
550.5	1806.94
550.8	1806.61
551.1	1806.3
551.4	1806.01
551.7	1805.73
552	1805.47
552.3	1805.22
552.6	1804.96
552.9	1804.7
553.2	1804.42
553.5	1804.13
553.8	1803.81
554.1	1803.47
554.4	1803.09
554.7	1802.67
555	1802.22
555.3	1801.71
555.6	1801.16
555.9	1800.55
556.2	1799.89
556.5	1799.18
556.8	1798.41
557.1	1797.59
557.4	1796.72
557.7	1795.81
558	1794.86
558.3	1793.88
558.6	1792.88
558.9	1791.87
559.2	1790.86
559.5	1789.88
559.8	1788.92
560.1	1788
560.4	1787.14
560.7	1786.34
561	1785.62
561.3	1784.99
561.6	1784.44
561.9	1783.98
562.2	1783.62
562.5	1783.34
562.8	1783.14
563.1	1783.01
563.4	1782.92
563.7	1782.88
564	1782.86
564.3	1782.83
564.6	1782.78
564.9	1782.7
565.2	1782.55
565.5	1782.32
565.8	1782.01
566.1	1781.59
566.4	1781.07
566.7	1780.43
567	1779.69
567.3	1778.85
567.6	1777.92
567.9	1776.93
568.2	1775.88
568.5	1774.82
568.8	1773.77
569.1	1772.75
569.4	1771.81
569.7	1770.97
570	1770.26
570.3	1769.71
570.6	1769.36
570.9	1769.21
571.2	1769.29
571.5	1769.6
571.8	1770.16
572.1	1770.95
572.4	1771.98
572.7	1773.22
573	1774.66
573.3	1776.26
573.6	1778
573.9	1779.84
574.2	1781.73
574.5	1783.64
574.8	1785.52
575.1	1787.33
575.4	1789.02
575.7	1790.55
576	1791.9
576.3	1793.01
576.6	1793.88
576.9	1794.47
577.2	1794.78
577.5	1794.79
577.8	1794.5
578.1	1793.93
578.4	1793.08
578.7	1791.96
579	1790.62
579.3	1789.06
579.6	1787.32
579.9	1785.43
580.2	1783.43
580.5	1781.34
580.8	1779.2
581.1	1777.04
581.4	1774.89
581.7	1772.77
582	1770.7
582.3	1768.7
582.6	1766.77
582.9	1764.94
583.2	1763.19
583.5	1761.53
583.8	1759.95
584.1	1758.47
584.4	1757.05
584.7	1755.71
585	1754.43
585.3	1753.21
585.6	1752.04
585.9	1750.91
586.2	1749.82
586.5	1748.77
586.8	1747.76
587.1	1746.8
587.4	1745.88
587.7	1745.02
588	1744.22
588.3	1743.49
588.6	1742.83
588.9	1742.25
589.2	1741.75
589.5	1741.35
589.8	1741.03
590.1	1740.8
590.4	1740.66
590.7	1740.59
591	1740.59
591.3	1740.65
591.6	1740.74
591.9	1740.86
592.2	1740.98
592.5	1741.08
592.8	1741.14
593.1	1741.14
593.4	1741.06
593.7	1740.89
594	1740.61
594.3	1740.2
594.6	1739.67
594.9	1739
595.2	1738.21
595.5	1737.3
595.8	1736.28
596.1	1735.17
596.4	1733.99
596.7	1732.77
597	1731.54
597.3	1730.33
597.6	1729.18
597.9	1728.1
598.2	1727.13
598.5	1726.29
598.8	1725.61
599.1	1725.1
599.4	1724.76
[truncated: 12,502 more rows]

## Sheet: Site 1-2
Raman shift (cm-1)	count
0	882.589
0.3	882.891
0.6	882.209
0.9	880.522
1.2	877.861
1.5	874.307
1.8	869.994
2.1	865.099
2.4	859.841
2.7	854.474
3	849.273
3.3	844.528
3.6	840.53
3.9	837.563
4.2	835.888
4.5	835.737
4.8	837.299
5.1	840.716
5.4	846.077
5.7	853.409
6	862.684
6.3	873.811
6.6	886.646
6.9	900.992
7.2	916.61
7.5	933.224
7.8	950.533
8.1	968.217
8.4	985.952
8.7	1003.42
9	1020.31
9.3	1036.33
9.6	1051.24
9.9	1064.8
10.2	1076.83
10.5	1087.19
10.8	1095.78
11.1	1102.54
11.4	1107.45
11.7	1110.55
12	1111.88
12.3	1111.54
12.6	1109.65
12.9	1106.35
13.2	1101.82
13.5	1096.24
13.8	1089.8
14.1	1082.71
14.4	1075.19
14.7	1067.46
15	1059.75
15.3	1052.27
15.6	1045.24
15.9	1038.87
16.2	1033.37
16.5	1028.93
16.8	1025.71
17.1	1023.85
17.4	1023.49
17.7	1024.7
18	1027.53
18.3	1032.01
18.6	1038.1
18.9	1045.73
19.2	1054.77
19.5	1065.06
19.8	1076.39
20.1	1088.5
20.4	1101.11
20.7	1113.9
21	1126.53
21.3	1138.64
21.6	1149.89
21.9	1159.92
22.2	1168.4
22.5	1175.05
22.8	1179.6
23.1	1181.85
23.4	1181.64
23.7	1178.9
24	1173.62
24.3	1165.85
24.6	1155.72
24.9	1143.44
25.2	1129.28
25.5	1113.55
25.8	1096.64
26.1	1078.95
26.4	1060.93
26.7	1043.03
27	1025.69
27.3	1009.35
27.6	994.42
27.9	981.252
28.2	970.157
28.5	961.377
28.8	955.079
29.1	951.353
29.4	950.208
29.7	951.568
30	955.277
30.3	961.102
30.6	968.74
30.9	977.829
31.2	987.958
31.5	998.681
31.8	1009.53
32.1	1020.02
32.4	1029.7
32.7	1038.11
33	1044.84
33.3	1049.54
33.6	1051.91
33.9	1051.71
34.2	1048.78
34.5	1043.06
34.8	1034.54
35.1	1023.31
35.4	1009.53
35.7	993.44
36	975.329
36.3	955.547
36.6	934.482
36.9	912.555
37.2	890.202
37.5	867.862
37.8	845.967
38.1	824.932
38.4	805.137
38.7	786.929
39	770.605
39.3	756.414
39.6	744.55
39.9	735.152
40.2	728.303
40.5	724.036
40.8	722.33
41.1	723.122
41.4	726.309
41.7	731.755
42	739.296
42.3	748.745
42.6	759.902
42.9	772.556
43.2	786.493
43.5	801.495
43.8	817.351
44.1	833.852
44.4	850.8
44.7	868.007
45	885.295
45.3	902.499
45.6	919.468
45.9	936.065
46.2	952.168
46.5	967.67
46.8	982.481
47.1	996.527
47.4	1009.75
47.7	1022.12
48	1033.61
48.3	1044.22
48.6	1053.96
48.9	1062.87
49.2	1071
49.5	1078.4
49.8	1085.14
50.1	1091.29
50.4	1096.93
50.7	1102.13
51	1106.96
51.3	1111.48
51.6	1115.73
51.9	1119.73
52.2	1123.5
52.5	1127.02
52.8	1130.26
53.1	1133.17
53.4	1135.68
53.7	1137.71
54	1139.16
54.3	1139.94
54.6	1139.95
54.9	1139.09
55.2	1137.28
55.5	1134.47
55.8	1130.6
56.1	1125.68
56.4	1119.71
56.7	1112.74
57	1104.84
57.3	1096.14
57.6	1086.78
57.9	1076.9
58.2	1066.71
58.5	1056.4
58.8	1046.19
59.1	1036.28
59.4	1026.87
59.7	1018.16
60	1010.33
60.3	1003.51
60.6	997.827
60.9	993.359
61.2	990.152
61.5	988.21
61.8	987.5
62.1	987.952
62.4	989.46
62.7	991.885
63	995.065
63.3	998.814
63.6	1002.93
63.9	1007.22
64.2	1011.46
64.5	1015.45
64.8	1019.01
65.1	1021.98
65.4	1024.2
65.7	1025.59
66	1026.05
66.3	1025.58
66.6	1024.17
66.9	1021.9
67.2	1018.86
67.5	1015.2
67.8	1011.1
68.1	1006.78
68.4	1002.5
68.7	998.514
69	995.116
69.3	992.588
69.6	991.208
69.9	991.237
70.2	992.906
70.5	996.409
70.8	1001.89
71.1	1009.44
71.4	1019.08
71.7	1030.76
72	1044.38
72.3	1059.74
72.6	1076.6
72.9	1094.63
73.2	1113.47
73.5	1132.7
73.8	1151.86
74.1	1170.5
74.4	1188.15
74.7	1204.35
75	1218.69
75.3	1230.77
75.6	1240.3
75.9	1247.03
76.2	1250.8
76.5	1251.55
76.8	1249.32
77.1	1244.21
77.4	1236.46
77.7	1226.37
78	1214.32
78.3	1200.75
78.6	1186.14
78.9	1171.03
79.2	1155.93
79.5	1141.38
79.8	1127.87
80.1	1115.84
80.4	1105.71
80.7	1097.79
81	1092.32
81.3	1089.45
81.6	1089.25
81.9	1091.69
82.2	1096.64
82.5	1103.91
82.8	1113.22
83.1	1124.24
83.4	1136.6
83.7	1149.87
84	1163.63
84.3	1177.45
84.6	1190.92
84.9	1203.65
85.2	1215.27
85.5	1225.49
85.8	1234.05
86.1	1240.75
86.4	1245.46
86.7	1248.09
87	1248.62
87.3	1247.09
87.6	1243.59
87.9	1238.23
88.2	1231.18
88.5	1222.63
88.8	1212.79
89.1	1201.9
89.4	1190.21
89.7	1177.97
90	1165.42
90.3	1152.83
90.6	1140.46
90.9	1128.55
91.2	1117.35
91.5	1107.1
91.8	1098.03
92.1	1090.37
92.4	1084.33
92.7	1080.12
93	1077.92
93.3	1077.89
93.6	1080.19
93.9	1084.94
94.2	1092.21
94.5	1102.08
94.8	1114.57
95.1	1129.64
95.4	1147.24
95.7	1167.27
96	1189.57
96.3	1213.98
96.6	1240.28
96.9	1268.2
97.2	1297.51
97.5	1327.9
97.8	1359.1
98.1	1390.83
98.4	1422.82
98.7	1454.85
99	1486.7
99.3	1518.22
99.6	1549.29
99.9	1579.87
100.2	1609.94
100.5	1639.56
100.8	1668.84
101.1	1697.95
101.4	1727.08
101.7	1756.5
102	1786.46
102.3	1817.27
102.6	1849.23
102.9	1882.64
103.2	1917.79
103.5	1954.97
103.8	1994.41
104.1	2036.35
104.4	2080.97
104.7	2128.41
105	2178.81
105.3	2232.25
105.6	2288.79
105.9	2348.48
106.2	2411.35
106.5	2477.42
106.8	2546.74
107.1	2619.34
107.4	2695.28
107.7	2774.65
108	2857.57
108.3	2944.16
108.6	3034.61
108.9	3129.1
109.2	3227.86
109.5	3331.11
109.8	3439.09
110.1	3552.04
110.4	3670.17
110.7	3793.68
111	3922.73
111.3	4057.43
111.6	4197.84
111.9	4343.94
112.2	4495.68
112.5	4652.89
112.8	4815.36
113.1	4982.79
113.4	5154.79
113.7	5330.95
114	5510.75
114.3	5693.65
114.6	5879.05
114.9	6066.32
115.2	6254.79
115.5	6443.82
115.8	6632.71
116.1	6820.8
116.4	7007.44
116.7	7191.98
117	7373.82
117.3	7552.37
117.6	7727.08
117.9	7897.44
118.2	8062.95
118.5	8223.16
118.8	8377.67
119.1	8526.09
119.4	8668.06
119.7	8803.25
120	8931.39
120.3	9052.18
120.6	9165.41
120.9	9270.85
121.2	9368.32
121.5	9457.68
121.8	9538.81
122.1	9611.62
122.4	9676.08
122.7	9732.17
123	9779.94
123.3	9819.47
123.6	9850.89
123.9	9874.36
124.2	9890.11
124.5	9898.39
124.8	9899.51
125.1	9893.8
125.4	9881.62
125.7	9863.39
126	9839.52
126.3	9810.46
126.6	9776.65
126.9	9738.54
127.2	9696.61
127.5	9651.29
127.8	9603.03
128.1	9552.24
128.4	9499.33
128.7	9444.69
129	9388.66
129.3	9331.58
129.6	9273.76
129.9	9215.47
130.2	9156.97
130.5	9098.49
130.8	9040.26
131.1	8982.45
131.4	8925.26
131.7	8868.84
132	8813.36
132.3	8758.95
132.6	8705.76
132.9	8653.91
133.2	8603.53
133.5	8554.73
133.8	8507.61
134.1	8462.28
134.4	8418.81
134.7	8377.29
135	8337.75
135.3	8300.26
135.6	8264.82
135.9	8231.44
136.2	8200.09
136.5	8170.73
136.8	8143.31
137.1	8117.73
137.4	8093.9
137.7	8071.7
138	8051
138.3	8031.67
138.6	8013.55
138.9	7996.52
139.2	7980.42
139.5	7965.12
139.8	7950.51
140.1	7936.48
140.4	7922.94
140.7	7909.83
141	7897.08
141.3	7884.69
141.6	7872.63
141.9	7860.93
142.2	7849.61
142.5	7838.71
142.8	7828.28
143.1	7818.38
143.4	7809.07
143.7	7800.4
144	7792.43
144.3	7785.21
144.6	7778.75
144.9	7773.09
145.2	7768.23
145.5	7764.15
145.8	7760.83
146.1	7758.23
146.4	7756.29
146.7	7754.95
147	7754.14
147.3	7753.78
147.6	7753.79
147.9	7754.1
148.2	7754.62
148.5	7755.29
148.8	7756.05
149.1	7756.84
149.4	7757.62
149.7	7758.37
150	7759.05
150.3	7759.65
150.6	7760.19
150.9	7760.66
151.2	7761.08
151.5	7761.47
151.8	7761.84
152.1	7762.23
152.4	7762.66
152.7	7763.15
153	7763.73
153.3	7764.42
153.6	7765.24
153.9	7766.2
154.2	7767.33
154.5	7768.63
154.8	7770.12
155.1	7771.82
155.4	7773.73
155.7	7775.87
156	7778.26
156.3	7780.91
156.6	7783.85
156.9	7787.09
157.2	7790.65
157.5	7794.57
157.8	7798.86
158.1	7803.54
158.4	7808.65
158.7	7814.19
159	7820.18
159.3	7826.64
159.6	7833.57
159.9	7840.97
160.2	7848.84
160.5	7857.15
160.8	7865.89
161.1	7875.02
161.4	7884.5
161.7	7894.29
162	7904.32
162.3	7914.53
162.6	7924.84
162.9	7935.17
163.2	7945.43
163.5	7955.52
163.8	7965.35
164.1	7974.8
164.4	7983.77
164.7	7992.15
165	7999.83
165.3	8006.7
165.6	8012.64
165.9	8017.56
166.2	8021.36
166.5	8023.94
166.8	8025.22
167.1	8025.12
167.4	8023.58
167.7	8020.54
168	8015.96
168.3	8009.81
168.6	8002.08
168.9	7992.76
169.2	7981.87
169.5	7969.42
169.8	7955.46
170.1	7940.03
170.4	7923.21
170.7	7905.04
171	7885.63
171.3	7865.06
171.6	7843.41
171.9	7820.8
172.2	7797.33
172.5	7773.1
172.8	7748.23
173.1	7722.83
173.4	7697.02
173.7	7670.89
174	7644.56
174.3	7618.13
174.6	7591.72
174.9	7565.41
175.2	7539.3
175.5	7513.48
175.8	7488.04
176.1	7463.06
176.4	7438.59
176.7	7414.71
177	7391.48
177.3	7368.93
177.6	7347.1
177.9	7326.03
178.2	7305.72
178.5	7286.18
178.8	7267.42
179.1	7249.4
179.4	7232.11
179.7	7215.5
180	7199.54
180.3	7184.17
180.6	7169.32
180.9	7154.94
181.2	7140.93
181.5	7127.25
181.8	7113.79
182.1	7100.5
182.4	7087.29
182.7	7074.1
183	7060.88
183.3	7047.55
183.6	7034.08
183.9	7020.43
184.2	7006.56
184.5	6992.47
184.8	6978.14
185.1	6963.58
185.4	6948.78
185.7	6933.77
186	6918.57
186.3	6903.19
186.6	6887.67
186.9	6872.03
187.2	6856.29
187.5	6840.49
187.8	6824.63
188.1	6808.72
188.4	6792.79
188.7	6776.81
189	6760.81
189.3	6744.75
189.6	6728.63
189.9	6712.42
190.2	6696.11
190.5	6679.67
190.8	6663.07
191.1	6646.29
191.4	6629.32
191.7	6612.14
192	6594.74
192.3	6577.11
192.6	6559.26
192.9	6541.19
193.2	6522.92
193.5	6504.47
193.8	6485.87
194.1	6467.14
194.4	6448.31
194.7	6429.41
195	6410.47
195.3	6391.52
195.6	6372.57
195.9	6353.66
196.2	6334.79
196.5	6315.96
196.8	6297.19
197.1	6278.46
197.4	6259.76
197.7	6241.08
198	6222.4
198.3	6203.7
198.6	6184.96
198.9	6166.17
199.2	6147.31
199.5	6128.36
199.8	6109.32
200.1	6090.2
200.4	6070.98
200.7	6051.7
201	6032.36
201.3	6012.99
201.6	5993.62
201.9	5974.27
202.2	5955
202.5	5935.83
202.8	5916.79
203.1	5897.93
203.4	5879.27
203.7	5860.84
204	5842.65
204.3	5824.72
204.6	5807.06
204.9	5789.66
205.2	5772.51
205.5	5755.6
205.8	5738.91
206.1	5722.4
206.4	5706.05
206.7	5689.82
207	5673.67
207.3	5657.57
207.6	5641.47
207.9	5625.33
208.2	5609.12
208.5	5592.8
208.8	5576.35
209.1	5559.74
209.4	5542.94
209.7	5525.93
210	5508.7
210.3	5491.24
210.6	5473.55
210.9	5455.61
211.2	5437.44
211.5	5419.04
211.8	5400.41
212.1	5381.58
212.4	5362.54
212.7	5343.33
213	5323.95
213.3	5304.44
213.6	5284.81
213.9	5265.1
214.2	5245.32
214.5	5225.5
214.8	5205.68
215.1	5185.87
215.4	5166.1
215.7	5146.4
216	5126.79
216.3	5107.3
216.6	5087.93
216.9	5068.7
217.2	5049.64
217.5	5030.74
217.8	5012.03
218.1	4993.5
218.4	4975.17
218.7	4957.03
219	4939.08
219.3	4921.33
219.6	4903.78
219.9	4886.43
220.2	4869.27
220.5	4852.31
220.8	4835.55
221.1	4818.99
221.4	4802.62
221.7	4786.45
222	4770.47
222.3	4754.69
222.6	4739.09
222.9	4723.67
223.2	4708.42
223.5	4693.32
223.8	4678.37
224.1	4663.54
224.4	4648.81
224.7	4634.16
225	4619.57
225.3	4605
225.6	4590.43
225.9	4575.84
226.2	4561.19
226.5	4546.48
226.8	4531.69
227.1	4516.79
227.4	4501.8
227.7	4486.69
228	4471.49
228.3	4456.19
228.6	4440.83
228.9	4425.42
229.2	4409.99
229.5	4394.56
229.8	4379.19
230.1	4363.89
230.4	4348.71
230.7	4333.67
231	4318.8
231.3	4304.14
231.6	4289.7
231.9	4275.49
232.2	4261.52
232.5	4247.79
232.8	4234.29
233.1	4221
233.4	4207.91
233.7	4194.99
234	4182.22
234.3	4169.55
234.6	4156.96
234.9	4144.42
235.2	4131.9
235.5	4119.36
235.8	4106.8
236.1	4094.19
236.4	4081.52
236.7	4068.79
237	4056
237.3	4043.16
237.6	4030.29
237.9	4017.39
238.2	4004.49
238.5	3991.61
238.8	3978.78
239.1	3966.01
239.4	3953.33
239.7	3940.75
240	3928.28
240.3	3915.92
240.6	3903.69
240.9	3891.57
241.2	3879.54
241.5	3867.6
241.8	3855.72
242.1	3843.88
242.4	3832.04
242.7	3820.19
243	3808.29
243.3	3796.32
243.6	3784.27
243.9	3772.11
244.2	3759.84
244.5	3747.46
244.8	3734.97
245.1	3722.39
245.4	3709.72
245.7	3697
246	3684.25
246.3	3671.51
246.6	3658.8
246.9	3646.16
247.2	3633.62
247.5	3621.21
247.8	3608.95
248.1	3596.85
248.4	3584.92
248.7	3573.17
249	3561.59
249.3	3550.17
249.6	3538.87
249.9	3527.69
250.2	3516.58
250.5	3505.52
250.8	3494.46
251.1	3483.39
251.4	3472.25
251.7	3461.03
252	3449.71
252.3	3438.26
252.6	3426.69
252.9	3415
253.2	3403.19
253.5	3391.28
253.8	3379.3
254.1	3367.27
254.4	3355.23
254.7	3343.22
255	3331.27
255.3	3319.43
255.6	3307.71
255.9	3296.17
256.2	3284.81
256.5	3273.66
256.8	3262.73
257.1	3252.01
257.4	3241.52
257.7	3231.22
258	3221.11
258.3	3211.15
258.6	3201.33
258.9	3191.59
259.2	3181.92
259.5	3172.26
259.8	3162.59
260.1	3152.88
260.4	3143.09
260.7	3133.21
261	3123.2
261.3	3113.05
261.6	3102.76
261.9	3092.33
262.2	3081.75
262.5	3071.03
262.8	3060.19
263.1	3049.24
263.4	3038.2
263.7	3027.09
264	3015.94
264.3	3004.77
264.6	2993.6
264.9	2982.46
265.2	2971.38
265.5	2960.37
265.8	2949.47
266.1	2938.68
266.4	2928.03
266.7	2917.53
267	2907.2
267.3	2897.04
267.6	2887.08
267.9	2877.3
268.2	2867.72
268.5	2858.34
268.8	2849.15
269.1	2840.16
269.4	2831.35
269.7	2822.72
270	2814.26
270.3	2805.96
270.6	2797.8
270.9	2789.78
271.2	2781.87
271.5	2774.06
271.8	2766.33
272.1	2758.68
272.4	2751.08
272.7	2743.52
273	2735.99
273.3	2728.47
273.6	2720.96
273.9	2713.45
274.2	2705.91
274.5	2698.36
274.8	2690.77
275.1	2683.14
275.4	2675.47
275.7	2667.75
276	2659.97
276.3	2652.13
276.6	2644.22
276.9	2636.25
277.2	2628.21
277.5	2620.11
277.8	2611.93
278.1	2603.7
278.4	2595.41
278.7	2587.07
279	2578.7
279.3	2570.31
279.6	2561.91
279.9	2553.53
280.2	2545.19
280.5	2536.9
280.8	2528.68
281.1	2520.56
281.4	2512.56
281.7	2504.69
282	2496.96
282.3	2489.39
282.6	2481.98
282.9	2474.73
283.2	2467.64
283.5	2460.68
283.8	2453.86
284.1	2447.15
284.4	2440.52
284.7	2433.95
285	2427.41
285.3	2420.87
285.6	2414.3
285.9	2407.68
286.2	2400.99
286.5	2394.19
286.8	2387.29
287.1	2380.27
287.4	2373.12
287.7	2365.86
288	2358.49
288.3	2351.02
288.6	2343.49
288.9	2335.91
289.2	2328.31
289.5	2320.72
289.8	2313.18
290.1	2305.71
290.4	2298.35
290.7	2291.12
291	2284.05
291.3	2277.15
291.6	2270.44
291.9	2263.93
292.2	2257.63
292.5	2251.53
292.8	2245.63
293.1	2239.92
293.4	2234.39
293.7	2229.02
294	2223.8
294.3	2218.71
294.6	2213.72
294.9	2208.83
295.2	2204
295.5	2199.23
295.8	2194.49
296.1	2189.78
296.4	2185.08
296.7	2180.39
297	2175.68
297.3	2170.96
297.6	2166.22
297.9	2161.46
298.2	2156.68
298.5	2151.86
298.8	2147.03
299.1	2142.16
299.4	2137.27
299.7	2132.36
300	2127.43
300.3	2122.48
300.6	2117.53
300.9	2112.57
301.2	2107.61
301.5	2102.66
301.8	2097.73
302.1	2092.82
302.4	2087.94
302.7	2083.1
303	2078.3
303.3	2073.55
303.6	2068.85
303.9	2064.22
304.2	2059.64
304.5	2055.12
304.8	2050.67
305.1	2046.28
305.4	2041.95
305.7	2037.69
306	2033.48
306.3	2029.32
306.6	2025.23
306.9	2021.19
307.2	2017.21
307.5	2013.3
307.8	2009.46
308.1	2005.7
308.4	2002.02
308.7	1998.45
309	1994.98
309.3	1991.65
309.6	1988.45
309.9	1985.39
310.2	1982.5
310.5	1979.78
310.8	1977.23
311.1	1974.86
311.4	1972.66
311.7	1970.63
312	1968.76
312.3	1967.03
312.6	1965.43
312.9	1963.94
313.2	1962.53
313.5	1961.17
313.8	1959.84
314.1	1958.52
314.4	1957.16
314.7	1955.76
315	1954.29
315.3	1952.72
315.6	1951.06
315.9	1949.28
316.2	1947.38
316.5	1945.36
316.8	1943.23
317.1	1941
317.4	1938.67
317.7	1936.26
318	1933.78
318.3	1931.27
318.6	1928.72
318.9	1926.17
319.2	1923.63
319.5	1921.1
319.8	1918.62
320.1	1916.17
320.4	1913.78
320.7	1911.44
321	1909.15
321.3	1906.92
321.6	1904.74
321.9	1902.61
322.2	1900.52
322.5	1898.47
322.8	1896.44
323.1	1894.44
323.4	1892.46
323.7	1890.5
324	1888.54
324.3	1886.6
324.6	1884.67
324.9	1882.76
325.2	1880.85
325.5	1878.96
325.8	1877.09
326.1	1875.24
326.4	1873.41
326.7	1871.6
327	1869.81
327.3	1868.04
327.6	1866.28
327.9	1864.55
328.2	1862.82
328.5	1861.11
328.8	1859.4
329.1	1857.69
329.4	1855.98
329.7	1854.26
330	1852.54
330.3	1850.82
330.6	1849.1
330.9	1847.38
331.2	1845.66
331.5	1843.97
331.8	1842.3
332.1	1840.66
332.4	1839.07
332.7	1837.53
333	1836.06
333.3	1834.66
333.6	1833.35
333.9	1832.13
334.2	1831.02
334.5	1830.01
334.8	1829.11
335.1	1828.32
335.4	1827.64
335.7	1827.07
336	1826.59
336.3	1826.21
336.6	1825.91
336.9	1825.69
337.2	1825.53
337.5	1825.42
337.8	1825.35
338.1	1825.31
338.4	1825.28
338.7	1825.26
339	1825.24
339.3	1825.2
339.6	1825.14
339.9	1825.06
340.2	1824.94
340.5	1824.79
340.8	1824.6
341.1	1824.37
341.4	1824.1
341.7	1823.79
342	1823.46
342.3	1823.09
342.6	1822.7
342.9	1822.28
343.2	1821.85
343.5	1821.4
343.8	1820.95
344.1	1820.5
344.4	1820.04
344.7	1819.59
345	1819.14
345.3	1818.7
345.6	1818.27
345.9	1817.85
346.2	1817.43
346.5	1817.02
346.8	1816.62
347.1	1816.22
347.4	1815.82
347.7	1815.42
348	1815.03
348.3	1814.64
348.6	1814.26
348.9	1813.89
349.2	1813.53
349.5	1813.2
349.8	1812.89
350.1	1812.62
350.4	1812.4
350.7	1812.23
351	1812.12
351.3	1812.1
351.6	1812.16
351.9	1812.31
352.2	1812.57
352.5	1812.93
352.8	1813.41
353.1	1814
353.4	1814.71
353.7	1815.52
354	1816.44
354.3	1817.46
354.6	1818.58
354.9	1819.77
355.2	1821.02
355.5	1822.33
355.8	1823.68
356.1	1825.06
356.4	1826.45
356.7	1827.84
357	1829.21
357.3	1830.56
357.6	1831.88
357.9	1833.15
358.2	1834.37
358.5	1835.54
358.8	1836.65
359.1	1837.7
359.4	1838.69
359.7	1839.62
360	1840.49
360.3	1841.29
360.6	1842.04
360.9	1842.73
361.2	1843.36
361.5	1843.94
361.8	1844.46
362.1	1844.94
362.4	1845.36
362.7	1845.73
363	1846.05
363.3	1846.32
363.6	1846.55
363.9	1846.72
364.2	1846.86
364.5	1846.95
364.8	1847
365.1	1847.02
365.4	1847
365.7	1846.96
366	1846.9
366.3	1846.83
366.6	1846.75
366.9	1846.67
367.2	1846.61
367.5	1846.56
367.8	1846.53
368.1	1846.54
368.4	1846.6
368.7	1846.7
369	1846.86
369.3	1847.07
369.6	1847.35
369.9	1847.69
370.2	1848.1
370.5	1848.58
370.8	1849.11
371.1	1849.7
371.4	1850.34
371.7	1851.01
372	1851.71
372.3	1852.43
372.6	1853.15
372.9	1853.86
373.2	1854.55
373.5	1855.21
373.8	1855.82
374.1	1856.37
374.4	1856.85
374.7	1857.27
375	1857.61
375.3	1857.87
375.6	1858.07
375.9	1858.2
376.2	1858.28
376.5	1858.31
376.8	1858.32
377.1	1858.3
377.4	1858.3
377.7	1858.31
378	1858.36
378.3	1858.47
378.6	1858.64
378.9	1858.9
379.2	1859.24
379.5	1859.67
379.8	1860.21
380.1	1860.83
380.4	1861.55
380.7	1862.34
381	1863.21
381.3	1864.12
381.6	1865.08
381.9	1866.06
382.2	1867.04
382.5	1868.01
382.8	1868.96
383.1	1869.87
383.4	1870.73
383.7	1871.54
384	1872.3
384.3	1873.01
384.6	1873.68
384.9	1874.31
385.2	1874.93
385.5	1875.54
385.8	1876.16
386.1	1876.81
386.4	1877.5
386.7	1878.27
387	1879.11
387.3	1880.05
387.6	1881.09
387.9	1882.25
388.2	1883.51
388.5	1884.88
388.8	1886.36
389.1	1887.93
389.4	1889.58
389.7	1891.29
390	1893.04
390.3	1894.81
390.6	1896.57
390.9	1898.3
391.2	1899.98
391.5	1901.58
391.8	1903.08
392.1	1904.46
392.4	1905.7
392.7	1906.79
393	1907.71
393.3	1908.47
393.6	1909.05
393.9	1909.45
394.2	1909.68
394.5	1909.73
394.8	1909.63
395.1	1909.37
395.4	1908.98
395.7	1908.46
396	1907.84
396.3	1907.13
396.6	1906.36
396.9	1905.54
397.2	1904.69
397.5	1903.84
397.8	1903.01
398.1	1902.21
398.4	1901.47
398.7	1900.8
399	1900.22
399.3	1899.75
399.6	1899.39
399.9	1899.16
400.2	1899.07
400.5	1899.12
400.8	1899.31
401.1	1899.65
401.4	1900.14
401.7	1900.77
402	1901.54
402.3	1902.44
402.6	1903.47
402.9	1904.62
403.2	1905.88
403.5	1907.25
403.8	1908.71
404.1	1910.25
404.4	1911.86
404.7	1913.54
405	1915.27
405.3	1917.05
405.6	1918.86
405.9	1920.69
406.2	1922.53
406.5	1924.38
406.8	1926.22
407.1	1928.05
407.4	1929.87
407.7	1931.66
408	1933.45
408.3	1935.22
408.6	1936.99
408.9	1938.79
409.2	1940.63
409.5	1942.55
409.8	1944.59
410.1	1946.79
410.4	1949.21
410.7	1951.89
411	1954.91
411.3	1958.32
411.6	1962.18
411.9	1966.56
412.2	1971.49
412.5	1977.02
412.8	1983.17
413.1	1989.97
413.4	1997.4
413.7	2005.45
414	2014.05
414.3	2023.16
414.6	2032.67
414.9	2042.48
415.2	2052.46
415.5	2062.46
415.8	2072.31
416.1	2081.86
416.4	2090.92
416.7	2099.32
417	2106.89
417.3	2113.47
417.6	2118.93
417.9	2123.14
418.2	2126.01
418.5	2127.47
418.8	2127.47
419.1	2126.02
419.4	2123.15
419.7	2118.91
420	2113.4
420.3	2106.72
420.6	2099.03
420.9	2090.47
421.2	2081.24
421.5	2071.5
421.8	2061.45
422.1	2051.27
422.4	2041.15
422.7	2031.24
423	2021.7
423.3	2012.67
423.6	2004.26
423.9	1996.54
424.2	1989.6
424.5	1983.47
424.8	1978.16
425.1	1973.67
425.4	1969.99
425.7	1967.06
426	1964.84
426.3	1963.26
426.6	1962.25
426.9	1961.72
427.2	1961.61
427.5	1961.84
427.8	1962.33
428.1	1963.01
428.4	1963.82
428.7	1964.7
429	1965.61
429.3	1966.51
429.6	1967.37
429.9	1968.16
430.2	1968.87
430.5	1969.49
430.8	1970.01
431.1	1970.43
431.4	1970.75
431.7	1970.99
432	1971.14
432.3	1971.23
432.6	1971.25
432.9	1971.22
433.2	1971.15
433.5	1971.06
433.8	1970.95
434.1	1970.85
434.4	1970.75
434.7	1970.68
435	1970.64
435.3	1970.66
435.6	1970.73
435.9	1970.88
436.2	1971.1
436.5	1971.42
436.8	1971.83
437.1	1972.35
437.4	1972.97
437.7	1973.7
438	1974.52
438.3	1975.45
438.6	1976.47
438.9	1977.56
439.2	1978.71
439.5	1979.92
439.8	1981.15
440.1	1982.4
440.4	1983.64
440.7	1984.86
441	1986.03
441.3	1987.15
441.6	1988.2
441.9	1989.16
442.2	1990.04
442.5	1990.82
442.8	1991.51
443.1	1992.12
443.4	1992.64
443.7	1993.09
444	1993.49
444.3	1993.84
444.6	1994.17
444.9	1994.48
445.2	1994.8
445.5	1995.14
445.8	1995.5
446.1	1995.91
446.4	1996.35
446.7	1996.84
447	1997.36
447.3	1997.91
447.6	1998.48
447.9	1999.05
448.2	1999.59
448.5	2000.1
448.8	2000.54
449.1	2000.88
449.4	2001.11
449.7	2001.19
450	2001.12
450.3	2000.86
450.6	2000.41
450.9	1999.75
451.2	1998.89
451.5	1997.82
451.8	1996.54
452.1	1995.07
452.4	1993.43
452.7	1991.64
453	1989.71
453.3	1987.69
453.6	1985.59
453.9	1983.44
454.2	1981.29
454.5	1979.16
454.8	1977.07
455.1	1975.05
455.4	1973.13
455.7	1971.33
456	1969.65
456.3	1968.11
456.6	1966.72
456.9	1965.48
457.2	1964.39
457.5	1963.44
457.8	1962.63
458.1	1961.93
458.4	1961.35
458.7	1960.86
459	1960.46
459.3	1960.11
459.6	1959.82
459.9	1959.56
460.2	1959.32
460.5	1959.08
460.8	1958.85
461.1	1958.6
461.4	1958.33
461.7	1958.04
462	1957.73
462.3	1957.38
462.6	1957
462.9	1956.6
463.2	1956.17
463.5	1955.72
463.8	1955.24
464.1	1954.76
464.4	1954.26
464.7	1953.77
465	1953.28
465.3	1952.79
465.6	1952.33
465.9	1951.89
466.2	1951.47
466.5	1951.09
466.8	1950.76
467.1	1950.46
467.4	1950.22
467.7	1950.03
468	1949.89
468.3	1949.8
468.6	1949.77
468.9	1949.78
469.2	1949.83
469.5	1949.91
469.8	1950.02
470.1	1950.14
470.4	1950.26
470.7	1950.37
471	1950.45
471.3	1950.48
471.6	1950.46
471.9	1950.37
472.2	1950.21
472.5	1949.95
472.8	1949.6
473.1	1949.16
473.4	1948.61
473.7	1947.98
474	1947.26
474.3	1946.47
474.6	1945.61
474.9	1944.7
475.2	1943.76
475.5	1942.81
475.8	1941.86
476.1	1940.92
476.4	1940.03
476.7	1939.17
477	1938.38
477.3	1937.65
477.6	1936.99
477.9	1936.39
478.2	1935.87
478.5	1935.41
478.8	1935
479.1	1934.64
479.4	1934.31
479.7	1934.01
480	1933.72
480.3	1933.42
480.6	1933.13
480.9	1932.81
481.2	1932.48
481.5	1932.12
481.8	1931.74
482.1	1931.34
482.4	1930.93
482.7	1930.5
483	1930.07
483.3	1929.64
483.6	1929.22
483.9	1928.82
484.2	1928.44
484.5	1928.08
484.8	1927.75
485.1	1927.45
485.4	1927.18
485.7	1926.92
486	1926.67
486.3	1926.43
486.6	1926.19
486.9	1925.94
487.2	1925.66
487.5	1925.35
487.8	1925
488.1	1924.6
488.4	1924.15
488.7	1923.65
489	1923.1
489.3	1922.49
489.6	1921.82
489.9	1921.12
490.2	1920.37
490.5	1919.59
490.8	1918.79
491.1	1917.98
491.4	1917.16
491.7	1916.34
492	1915.55
492.3	1914.77
492.6	1914.03
492.9	1913.33
493.2	1912.67
493.5	1912.07
493.8	1911.53
494.1	1911.04
494.4	1910.63
494.7	1910.29
495	1910.01
495.3	1909.81
495.6	1909.69
495.9	1909.63
496.2	1909.63
496.5	1909.69
496.8	1909.8
497.1	1909.95
497.4	1910.12
497.7	1910.29
498	1910.45
498.3	1910.58
498.6	1910.65
498.9	1910.64
499.2	1910.53
499.5	1910.29
499.8	1909.91
500.1	1909.36
500.4	1908.63
500.7	1907.71
501	1906.59
501.3	1905.29
501.6	1903.8
501.9	1902.13
502.2	1900.31
502.5	1898.36
502.8	1896.32
503.1	1894.21
503.4	1892.07
503.7	1889.95
504	1887.88
504.3	1885.9
504.6	1884.05
504.9	1882.36
505.2	1880.85
505.5	1879.55
505.8	1878.47
506.1	1877.61
506.4	1876.97
506.7	1876.54
507	1876.3
507.3	1876.24
507.6	1876.31
507.9	1876.49
508.2	1876.74
508.5	1877.02
508.8	1877.3
509.1	1877.53
509.4	1877.7
509.7	1877.76
510	1877.69
510.3	1877.48
510.6	1877.12
510.9	1876.6
511.2	1875.92
511.5	1875.09
511.8	1874.13
512.1	1873.05
512.4	1871.88
512.7	1870.63
513	1869.35
513.3	1868.06
513.6	1866.78
513.9	1865.54
514.2	1864.36
514.5	1863.27
514.8	1862.28
515.1	1861.41
515.4	1860.67
515.7	1860.05
516	1859.56
516.3	1859.19
516.6	1858.93
516.9	1858.78
517.2	1858.72
517.5	1858.73
517.8	1858.79
518.1	1858.88
518.4	1858.99
518.7	1859.09
519	1859.16
519.3	1859.19
519.6	1859.16
519.9	1859.06
520.2	1858.88
520.5	1858.61
520.8	1858.26
521.1	1857.8
521.4	1857.26
521.7	1856.63
522	1855.93
522.3	1855.15
522.6	1854.31
522.9	1853.43
523.2	1852.52
523.5	1851.58
523.8	1850.63
524.1	1849.69
524.4	1848.75
524.7	1847.83
525	1846.93
525.3	1846.06
525.6	1845.22
525.9	1844.41
526.2	1843.63
526.5	1842.87
526.8	1842.14
527.1	1841.43
527.4	1840.74
527.7	1840.07
528	1839.41
528.3	1838.78
528.6	1838.16
528.9	1837.56
529.2	1836.99
529.5	1836.44
529.8	1835.93
530.1	1835.46
530.4	1835.03
530.7	1834.64
531	1834.3
531.3	1834
531.6	1833.74
531.9	1833.51
532.2	1833.3
532.5	1833.1
532.8	1832.9
533.1	1832.68
533.4	1832.43
533.7	1832.13
534	1831.78
534.3	1831.34
534.6	1830.83
534.9	1830.23
535.2	1829.55
535.5	1828.78
535.8	1827.93
536.1	1827.02
536.4	1826.05
536.7	1825.05
537	1824.04
537.3	1823.04
537.6	1822.06
537.9	1821.13
538.2	1820.27
538.5	1819.49
538.8	1818.8
539.1	1818.21
539.4	1817.72
539.7	1817.31
540	1817
540.3	1816.75
540.6	1816.55
540.9	1816.39
541.2	1816.24
541.5	1816.08
541.8	1815.89
542.1	1815.65
542.4	1815.34
542.7	1814.95
543	1814.47
543.3	1813.9
543.6	1813.23
543.9	1812.48
544.2	1811.64
544.5	1810.73
544.8	1809.77
545.1	1808.77
545.4	1807.75
545.7	1806.73
546	1805.73
546.3	1804.76
546.6	1803.84
546.9	1802.98
547.2	1802.19
547.5	1801.49
547.8	1800.87
548.1	1800.35
548.4	1799.92
548.7	1799.59
549	1799.37
549.3	1799.24
549.6	1799.21
549.9	1799.27
550.2	1799.44
550.5	1799.71
550.8	1800.08
551.1	1800.55
551.4	1801.11
551.7	1801.76
552	1802.49
552.3	1803.31
552.6	1804.18
552.9	1805.11
553.2	1806.07
553.5	1807.04
553.8	1808.01
554.1	1808.94
554.4	1809.81
554.7	1810.59
555	1811.26
555.3	1811.79
555.6	1812.16
555.9	1812.36
556.2	1812.35
556.5	1812.15
556.8	1811.74
557.1	1811.12
557.4	1810.3
557.7	1809.31
558	1808.15
558.3	1806.86
558.6	1805.46
558.9	1803.99
559.2	1802.48
559.5	1800.96
559.8	1799.48
560.1	1798.06
560.4	1796.74
560.7	1795.52
561	1794.45
561.3	1793.52
561.6	1792.74
561.9	1792.11
562.2	1791.64
562.5	1791.29
562.8	1791.06
563.1	1790.92
563.4	1790.85
563.7	1790.82
564	1790.81
564.3	1790.78
564.6	1790.71
564.9	1790.59
565.2	1790.39
565.5	1790.11
565.8	1789.73
566.1	1789.26
566.4	1788.7
566.7	1788.05
567	1787.34
567.3	1786.58
567.6	1785.79
567.9	1784.99
568.2	1784.2
568.5	1783.45
568.8	1782.76
569.1	1782.15
569.4	1781.63
569.7	1781.21
570	1780.91
570.3	1780.73
570.6	1780.67
570.9	1780.72
571.2	1780.9
571.5	1781.18
571.8	1781.57
572.1	1782.06
572.4	1782.64
572.7	1783.29
573	1784.03
573.3	1784.84
573.6	1785.71
573.9	1786.65
574.2	1787.65
574.5	1788.7
574.8	1789.81
575.1	1790.96
575.4	1792.14
575.7	1793.35
576	1794.56
576.3	1795.75
576.6	1796.9
576.9	1797.98
577.2	1798.96
577.5	1799.8
577.8	1800.46
578.1	1800.91
578.4	1801.1
578.7	1801.02
579	1800.63
579.3	1799.91
579.6	1798.84
579.9	1797.43
580.2	1795.66
580.5	1793.57
580.8	1791.16
581.1	1788.47
581.4	1785.55
581.7	1782.45
582	1779.2
582.3	1775.89
582.6	1772.56
582.9	1769.27
583.2	1766.08
583.5	1763.04
583.8	1760.2
584.1	1757.6
584.4	1755.26
584.7	1753.2
585	1751.44
585.3	1749.98
585.6	1748.8
585.9	1747.9
586.2	1747.24
586.5	1746.81
586.8	1746.56
587.1	1746.47
587.4	1746.51
587.7	1746.62
588	1746.8
588.3	1746.99
588.6	1747.18
588.9	1747.34
589.2	1747.45
589.5	1747.5
589.8	1747.46
590.1	1747.34
590.4	1747.12
590.7	1746.8
591	1746.37
591.3	1745.83
591.6	1745.18
591.9	1744.41
592.2	1743.53
592.5	1742.54
592.8	1741.44
593.1	1740.23
593.4	1738.92
593.7	1737.51
594	1736.03
594.3	1734.48
594.6	1732.88
594.9	1731.26
595.2	1729.62
595.5	1728
595.8	1726.42
596.1	1724.9
596.4	1723.47
596.7	1722.15
597	1720.97
597.3	1719.93
597.6	1719.05
597.9	1718.35
598.2	1717.82
598.5	1717.46
598.8	1717.28
599.1	1717.26
599.4	1717.39
[truncated: 12,502 more rows]

## Sheet: Site 1-3
Raman shift (cm-1)	count
0	920.939
0.3	904.704
0.6	889.157
0.9	874.592
1.2	861.263
1.5	849.38
1.8	839.105
2.1	830.55
2.4	823.78
2.7	818.81
3	815.616
3.3	814.137
3.6	814.282
3.9	815.939
4.2	818.98
4.5	823.269
4.8	828.668
5.1	835.042
5.4	842.261
5.7	850.204
6	858.758
6.3	867.819
6.6	877.289
6.9	887.078
7.2	897.093
7.5	907.244
7.8	917.436
8.1	927.57
8.4	937.542
8.7	947.24
9	956.551
9.3	965.359
9.6	973.551
9.9	981.02
10.2	987.674
10.5	993.438
10.8	998.261
11.1	1002.12
11.4	1005.03
11.7	1007.03
12	1008.2
12.3	1008.68
12.6	1008.61
12.9	1008.17
13.2	1007.57
13.5	1007.03
13.8	1006.77
14.1	1007.02
14.4	1007.98
14.7	1009.82
15	1012.69
15.3	1016.68
15.6	1021.83
15.9	1028.13
16.2	1035.49
16.5	1043.79
16.8	1052.82
17.1	1062.33
17.4	1072.03
17.7	1081.59
18	1090.65
18.3	1098.84
18.6	1105.81
18.9	1111.2
19.2	1114.69
19.5	1116.01
19.8	1114.94
20.1	1111.32
20.4	1105.06
20.7	1096.15
21	1084.64
21.3	1070.66
21.6	1054.44
21.9	1036.23
22.2	1016.37
22.5	995.226
22.8	973.213
23.1	950.762
23.4	928.315
23.7	906.309
24	885.167
24.3	865.285
24.6	847.02
24.9	830.684
25.2	816.533
25.5	804.77
25.8	795.532
26.1	788.899
26.4	784.887
26.7	783.457
27	784.519
27.3	787.934
27.6	793.527
27.9	801.091
28.2	810.396
28.5	821.201
28.8	833.257
29.1	846.319
29.4	860.151
29.7	874.533
30	889.263
30.3	904.165
30.6	919.084
30.9	933.893
31.2	948.49
31.5	962.794
31.8	976.743
32.1	990.29
32.4	1003.4
32.7	1016.04
33	1028.19
33.3	1039.8
33.6	1050.85
33.9	1061.28
34.2	1071.02
34.5	1080.02
34.8	1088.18
35.1	1095.42
35.4	1101.62
35.7	1106.7
36	1110.54
36.3	1113.07
36.6	1114.2
36.9	1113.88
37.2	1112.08
37.5	1108.81
37.8	1104.09
38.1	1098
38.4	1090.64
38.7	1082.15
39	1072.7
39.3	1062.51
39.6	1051.78
39.9	1040.77
40.2	1029.71
40.5	1018.85
40.8	1008.43
41.1	998.671
41.4	989.767
41.7	981.884
42	975.153
42.3	969.668
42.6	965.481
42.9	962.607
43.2	961.023
43.5	960.675
43.8	961.481
44.1	963.335
44.4	966.12
44.7	969.708
45	973.973
45.3	978.794
45.6	984.061
45.9	989.678
46.2	995.568
46.5	1001.67
46.8	1007.95
47.1	1014.38
47.4	1020.95
47.7	1027.66
48	1034.51
48.3	1041.51
48.6	1048.66
48.9	1055.95
49.2	1063.35
49.5	1070.83
49.8	1078.35
50.1	1085.84
50.4	1093.23
50.7	1100.44
51	1107.38
51.3	1113.99
51.6	1120.2
51.9	1125.96
52.2	1131.25
52.5	1136.05
52.8	1140.42
53.1	1144.41
53.4	1148.11
53.7	1151.65
54	1155.19
54.3	1158.88
54.6	1162.91
54.9	1167.45
55.2	1172.66
55.5	1178.71
55.8	1185.69
56.1	1193.7
56.4	1202.75
56.7	1212.84
57	1223.88
57.3	1235.74
57.6	1248.24
57.9	1261.15
58.2	1274.2
58.5	1287.11
58.8	1299.56
59.1	1311.26
59.4	1321.9
59.7	1331.22
60	1339.01
60.3	1345.09
60.6	1349.35
60.9	1351.77
61.2	1352.37
61.5	1351.27
61.8	1348.63
62.1	1344.71
62.4	1339.78
62.7	1334.17
63	1328.24
63.3	1322.35
63.6	1316.84
63.9	1312.05
64.2	1308.26
64.5	1305.72
64.8	1304.59
65.1	1304.98
65.4	1306.91
65.7	1310.35
66	1315.17
66.3	1321.17
66.6	1328.12
66.9	1335.73
67.2	1343.65
67.5	1351.56
67.8	1359.1
68.1	1365.92
68.4	1371.74
68.7	1376.26
69	1379.27
69.3	1380.61
69.6	1380.18
69.9	1377.95
70.2	1373.95
70.5	1368.28
70.8	1361.11
71.1	1352.65
71.4	1343.13
71.7	1332.85
72	1322.09
72.3	1311.18
72.6	1300.39
72.9	1290.03
73.2	1280.35
73.5	1271.56
73.8	1263.87
74.1	1257.42
74.4	1252.29
74.7	1248.55
75	1246.2
75.3	1245.21
75.6	1245.49
75.9	1246.96
76.2	1249.48
76.5	1252.9
76.8	1257.06
77.1	1261.79
77.4	1266.94
77.7	1272.33
78	1277.83
78.3	1283.29
78.6	1288.61
78.9	1293.68
79.2	1298.43
79.5	1302.81
79.8	1306.8
80.1	1310.38
80.4	1313.58
80.7	1316.42
81	1318.96
81.3	1321.27
81.6	1323.43
81.9	1325.53
82.2	1327.67
82.5	1329.96
82.8	1332.51
83.1	1335.43
83.4	1338.82
83.7	1342.79
84	1347.43
84.3	1352.83
84.6	1359.05
84.9	1366.15
85.2	1374.17
85.5	1383.11
85.8	1392.98
86.1	1403.75
86.4	1415.35
86.7	1427.72
87	1440.76
87.3	1454.34
87.6	1468.33
87.9	1482.57
88.2	1496.89
88.5	1511.11
88.8	1525.06
89.1	1538.55
89.4	1551.41
89.7	1563.47
90	1574.59
90.3	1584.63
90.6	1593.49
90.9	1601.1
91.2	1607.4
91.5	1612.38
91.8	1616.07
92.1	1618.52
92.4	1619.81
92.7	1620.05
93	1619.39
93.3	1618
93.6	1616.06
93.9	1613.78
94.2	1611.36
94.5	1609.01
94.8	1606.96
95.1	1605.4
95.4	1604.54
95.7	1604.54
96	1605.58
96.3	1607.79
96.6	1611.29
96.9	1616.17
97.2	1622.51
97.5	1630.35
97.8	1639.71
98.1	1650.61
98.4	1663.04
98.7	1676.98
99	1692.41
99.3	1709.31
99.6	1727.64
99.9	1747.38
100.2	1768.53
100.5	1791.09
100.8	1815.08
101.1	1840.53
101.4	1867.51
101.7	1896.07
102	1926.34
102.3	1958.41
102.6	1992.44
102.9	2028.59
103.2	2067.03
103.5	2107.96
103.8	2151.58
104.1	2198.13
104.4	2247.84
104.7	2300.94
105	2357.69
105.3	2418.34
105.6	2483.15
105.9	2552.38
106.2	2626.27
106.5	2705.08
106.8	2789.05
107.1	2878.42
107.4	2973.41
107.7	3074.22
108	3181.04
108.3	3294.03
108.6	3413.34
108.9	3539.08
109.2	3671.32
109.5	3810.11
109.8	3955.44
110.1	4107.28
110.4	4265.53
110.7	4430.08
111	4600.73
111.3	4777.26
111.6	4959.39
111.9	5146.81
112.2	5339.14
112.5	5535.97
112.8	5736.87
113.1	5941.33
113.4	6148.86
113.7	6358.91
114	6570.91
114.3	6784.28
114.6	6998.44
114.9	7212.77
115.2	7426.68
115.5	7639.55
115.8	7850.78
116.1	8059.77
116.4	8265.92
116.7	8468.65
117	8667.38
117.3	8861.56
117.6	9050.64
117.9	9234.1
118.2	9411.42
118.5	9582.14
118.8	9745.78
119.1	9901.91
119.4	10050.1
119.7	10190.1
120	10321.4
120.3	10443.9
120.6	10557.1
120.9	10661.1
121.2	10755.5
121.5	10840.3
121.8	10915.4
122.1	10980.9
122.4	11036.7
122.7	11083
123	11119.9
123.3	11147.6
123.6	11166.3
123.9	11176.4
124.2	11178
124.5	11171.7
124.8	11157.6
125.1	11136.2
125.4	11107.9
125.7	11073.2
126	11032.3
126.3	10985.8
126.6	10934.1
126.9	10877.7
127.2	10816.9
127.5	10752.1
127.8	10684
128.1	10612.7
128.4	10538.9
128.7	10462.9
129	10385.1
129.3	10305.9
129.6	10225.8
129.9	10145.1
130.2	10064.2
130.5	9983.5
130.8	9903.33
131.1	9824.03
131.4	9745.91
131.7	9669.23
132	9594.27
132.3	9521.25
132.6	9450.37
132.9	9381.79
133.2	9315.66
133.5	9252.06
133.8	9191.08
134.1	9132.76
134.4	9077.12
134.7	9024.15
135	8973.83
135.3	8926.12
135.6	8880.95
135.9	8838.25
136.2	8797.96
136.5	8759.98
136.8	8724.22
137.1	8690.61
137.4	8659.05
137.7	8629.45
138	8601.74
138.3	8575.82
138.6	8551.63
138.9	8529.08
139.2	8508.09
139.5	8488.59
139.8	8470.5
140.1	8453.76
140.4	8438.28
140.7	8424
141	8410.84
141.3	8398.74
141.6	8387.61
141.9	8377.4
142.2	8368.04
142.5	8359.47
142.8	8351.63
143.1	8344.47
143.4	8337.95
143.7	8332.03
144	8326.66
144.3	8321.81
144.6	8317.45
144.9	8313.57
145.2	8310.12
145.5	8307.09
145.8	8304.46
146.1	8302.2
146.4	8300.27
146.7	8298.67
147	8297.34
147.3	8296.26
147.6	8295.39
147.9	8294.69
148.2	8294.13
148.5	8293.66
148.8	8293.24
149.1	8292.84
149.4	8292.42
149.7	8291.96
150	8291.44
150.3	8290.85
150.6	8290.17
150.9	8289.41
151.2	8288.58
151.5	8287.7
151.8	8286.79
152.1	8285.9
152.4	8285.06
152.7	8284.31
153	8283.72
153.3	8283.32
153.6	8283.18
153.9	8283.36
154.2	8283.89
154.5	8284.83
154.8	8286.24
155.1	8288.15
155.4	8290.6
155.7	8293.62
156	8297.24
156.3	8301.49
156.6	8306.37
156.9	8311.91
157.2	8318.1
157.5	8324.96
157.8	8332.46
158.1	8340.62
158.4	8349.42
158.7	8358.84
159	8368.86
159.3	8379.47
159.6	8390.63
159.9	8402.32
160.2	8414.51
160.5	8427.15
160.8	8440.2
161.1	8453.61
161.4	8467.32
161.7	8481.28
162	8495.4
162.3	8509.62
162.6	8523.84
162.9	8537.96
163.2	8551.88
163.5	8565.49
163.8	8578.65
164.1	8591.25
164.4	8603.15
164.7	8614.19
165	8624.24
165.3	8633.15
165.6	8640.76
165.9	8646.94
166.2	8651.55
166.5	8654.45
166.8	8655.52
167.1	8654.67
167.4	8651.8
167.7	8646.84
168	8639.75
168.3	8630.5
168.6	8619.08
168.9	8605.53
169.2	8589.88
169.5	8572.23
169.8	8552.65
170.1	8531.27
170.4	8508.24
170.7	8483.7
171	8457.82
171.3	8430.79
171.6	8402.79
171.9	8374.01
172.2	8344.65
172.5	8314.9
172.8	8284.94
173.1	8254.93
173.4	8225.05
173.7	8195.44
174	8166.23
174.3	8137.54
174.6	8109.46
174.9	8082.07
175.2	8055.43
175.5	8029.59
175.8	8004.58
176.1	7980.4
176.4	7957.06
176.7	7934.55
177	7912.83
177.3	7891.89
177.6	7871.68
177.9	7852.15
178.2	7833.27
178.5	7814.97
178.8	7797.21
179.1	7779.93
179.4	7763.09
179.7	7746.65
180	7730.54
180.3	7714.73
180.6	7699.19
180.9	7683.87
181.2	7668.74
181.5	7653.78
181.8	7638.95
182.1	7624.23
182.4	7609.6
182.7	7595.03
183	7580.51
183.3	7566.01
183.6	7551.52
183.9	7537
184.2	7522.44
184.5	7507.81
184.8	7493.09
185.1	7478.24
185.4	7463.25
185.7	7448.1
186	7432.74
186.3	7417.16
186.6	7401.34
186.9	7385.26
187.2	7368.9
187.5	7352.25
187.8	7335.32
188.1	7318.08
188.4	7300.56
188.7	7282.76
189	7264.69
189.3	7246.38
189.6	7227.84
189.9	7209.1
190.2	7190.18
190.5	7171.11
190.8	7151.92
191.1	7132.62
191.4	7113.25
191.7	7093.8
192	7074.31
192.3	7054.78
192.6	7035.2
192.9	7015.59
193.2	6995.94
193.5	6976.24
193.8	6956.5
194.1	6936.69
194.4	6916.82
194.7	6896.88
195	6876.86
195.3	6856.77
195.6	6836.62
195.9	6816.4
196.2	6796.14
196.5	6775.84
196.8	6755.54
197.1	6735.24
197.4	6714.98
197.7	6694.78
198	6674.66
198.3	6654.64
198.6	6634.74
198.9	6614.97
199.2	6595.35
199.5	6575.86
199.8	6556.52
200.1	6537.31
200.4	6518.23
200.7	6499.26
201	6480.37
201.3	6461.55
201.6	6442.78
201.9	6424.04
202.2	6405.3
202.5	6386.56
202.8	6367.8
203.1	6349.02
203.4	6330.21
203.7	6311.36
204	6292.49
204.3	6273.61
204.6	6254.71
204.9	6235.82
205.2	6216.94
205.5	6198.08
205.8	6179.25
206.1	6160.45
206.4	6141.67
206.7	6122.91
207	6104.16
207.3	6085.4
207.6	6066.61
207.9	6047.77
208.2	6028.85
208.5	6009.82
208.8	5990.66
209.1	5971.35
209.4	5951.86
209.7	5932.19
210	5912.32
210.3	5892.27
210.6	5872.03
210.9	5851.64
211.2	5831.11
211.5	5810.49
211.8	5789.82
212.1	5769.15
212.4	5748.52
212.7	5727.99
213	5707.62
213.3	5687.45
213.6	5667.54
213.9	5647.91
214.2	5628.61
214.5	5609.65
214.8	5591.04
215.1	5572.79
215.4	5554.89
215.7	5537.3
216	5520.01
216.3	5502.97
216.6	5486.14
216.9	5469.45
217.2	5452.86
217.5	5436.31
217.8	5419.75
218.1	5403.11
218.4	5386.34
218.7	5369.42
219	5352.3
219.3	5334.95
219.6	5317.36
219.9	5299.53
220.2	5281.45
220.5	5263.14
220.8	5244.62
221.1	5225.92
221.4	5207.07
221.7	5188.11
222	5169.09
222.3	5150.05
222.6	5131.03
222.9	5112.08
223.2	5093.24
223.5	5074.54
223.8	5056.02
224.1	5037.68
224.4	5019.57
224.7	5001.67
225	4984
225.3	4966.56
225.6	4949.33
225.9	4932.3
226.2	4915.46
226.5	4898.77
226.8	4882.23
227.1	4865.8
227.4	4849.46
227.7	4833.19
228	4816.96
228.3	4800.77
228.6	4784.6
228.9	4768.44
229.2	4752.28
229.5	4736.12
229.8	4719.97
230.1	4703.83
230.4	4687.72
230.7	4671.64
231	4655.61
231.3	4639.64
231.6	4623.75
231.9	4607.94
232.2	4592.25
232.5	4576.66
232.8	4561.21
233.1	4545.88
233.4	4530.69
233.7	4515.64
234	4500.73
234.3	4485.96
234.6	4471.33
234.9	4456.82
235.2	4442.44
235.5	4428.18
235.8	4414.04
236.1	4400.01
236.4	4386.09
236.7	4372.27
237	4358.55
237.3	4344.93
237.6	4331.4
237.9	4317.96
238.2	4304.6
238.5	4291.34
238.8	4278.15
239.1	4265.03
239.4	4251.98
239.7	4238.99
240	4226.05
240.3	4213.15
240.6	4200.28
240.9	4187.43
241.2	4174.59
241.5	4161.75
241.8	4148.9
242.1	4136.03
242.4	4123.13
242.7	4110.21
243	4097.27
243.3	4084.3
243.6	4071.32
243.9	4058.32
244.2	4045.32
244.5	4032.34
244.8	4019.37
245.1	4006.44
245.4	3993.55
245.7	3980.71
246	3967.94
246.3	3955.25
246.6	3942.63
246.9	3930.08
247.2	3917.61
247.5	3905.21
247.8	3892.87
248.1	3880.59
248.4	3868.35
248.7	3856.14
249	3843.95
249.3	3831.76
249.6	3819.58
249.9	3807.39
250.2	3795.18
250.5	3782.97
250.8	3770.74
251.1	3758.52
251.4	3746.3
251.7	3734.11
252	3721.95
252.3	3709.85
252.6	3697.83
252.9	3685.9
253.2	3674.08
253.5	3662.39
253.8	3650.84
254.1	3639.44
254.4	3628.2
254.7	3617.1
255	3606.15
255.3	3595.34
255.6	3584.65
255.9	3574.06
256.2	3563.54
256.5	3553.08
256.8	3542.64
257.1	3532.2
257.4	3521.73
257.7	3511.2
258	3500.59
258.3	3489.87
258.6	3479.04
258.9	3468.07
259.2	3456.97
259.5	3445.71
259.8	3434.32
260.1	3422.79
260.4	3411.12
260.7	3399.35
261	3387.47
261.3	3375.51
261.6	3363.48
261.9	3351.42
262.2	3339.33
262.5	3327.24
262.8	3315.17
263.1	3303.15
263.4	3291.19
263.7	3279.31
264	3267.52
264.3	3255.86
264.6	3244.33
264.9	3232.94
265.2	3221.72
265.5	3210.67
265.8	3199.8
266.1	3189.12
266.4	3178.64
266.7	3168.36
267	3158.28
267.3	3148.39
267.6	3138.7
267.9	3129.18
268.2	3119.83
268.5	3110.63
268.8	3101.55
269.1	3092.56
269.4	3083.65
269.7	3074.79
270	3065.93
270.3	3057.06
270.6	3048.14
270.9	3039.15
271.2	3030.06
271.5	3020.86
271.8	3011.54
272.1	3002.08
272.4	2992.49
272.7	2982.76
273	2972.93
273.3	2962.99
273.6	2952.98
273.9	2942.93
274.2	2932.86
274.5	2922.81
274.8	2912.83
275.1	2902.93
275.4	2893.16
275.7	2883.54
276	2874.1
276.3	2864.87
276.6	2855.84
276.9	2847.04
277.2	2838.47
277.5	2830.1
277.8	2821.94
278.1	2813.96
278.4	2806.14
278.7	2798.45
279	2790.87
279.3	2783.35
279.6	2775.87
279.9	2768.39
280.2	2760.89
280.5	2753.33
280.8	2745.7
281.1	2737.97
281.4	2730.14
281.7	2722.19
282	2714.13
282.3	2705.94
282.6	2697.65
282.9	2689.26
283.2	2680.79
283.5	2672.25
283.8	2663.66
284.1	2655.04
284.4	2646.42
284.7	2637.81
285	2629.24
285.3	2620.72
285.6	2612.28
285.9	2603.93
286.2	2595.68
286.5	2587.54
286.8	2579.52
287.1	2571.63
287.4	2563.87
287.7	2556.24
288	2548.75
288.3	2541.38
288.6	2534.14
288.9	2527.02
289.2	2520.02
289.5	2513.13
289.8	2506.34
290.1	2499.64
290.4	2493.03
290.7	2486.51
291	2480.06
291.3	2473.69
291.6	2467.38
291.9	2461.14
292.2	2454.95
292.5	2448.83
292.8	2442.76
293.1	2436.74
293.4	2430.78
293.7	2424.87
294	2419.02
294.3	2413.22
294.6	2407.47
294.9	2401.77
295.2	2396.11
295.5	2390.5
295.8	2384.94
296.1	2379.41
296.4	2373.91
296.7	2368.43
297	2362.98
297.3	2357.54
297.6	2352.1
297.9	2346.67
298.2	2341.22
298.5	2335.77
298.8	2330.3
299.1	2324.82
299.4	2319.32
299.7	2313.81
300	2308.28
300.3	2302.76
300.6	2297.25
300.9	2291.75
301.2	2286.28
301.5	2280.86
301.8	2275.51
302.1	2270.23
302.4	2265.04
302.7	2259.96
303	2255.01
303.3	2250.19
303.6	2245.52
303.9	2241
304.2	2236.64
304.5	2232.45
304.8	2228.42
305.1	2224.54
305.4	2220.82
305.7	2217.24
306	2213.79
306.3	2210.45
306.6	2207.2
306.9	2204.03
307.2	2200.92
307.5	2197.85
307.8	2194.79
308.1	2191.72
308.4	2188.63
308.7	2185.5
309	2182.31
309.3	2179.05
309.6	2175.7
309.9	2172.27
310.2	2168.73
310.5	2165.09
310.8	2161.35
311.1	2157.52
311.4	2153.59
311.7	2149.59
312	2145.52
312.3	2141.4
312.6	2137.25
312.9	2133.08
313.2	2128.92
313.5	2124.8
313.8	2120.74
314.1	2116.76
314.4	2112.88
314.7	2109.13
315	2105.52
315.3	2102.08
315.6	2098.81
315.9	2095.73
316.2	2092.85
316.5	2090.17
316.8	2087.67
317.1	2085.36
317.4	2083.23
317.7	2081.24
318	2079.4
318.3	2077.67
318.6	2076.02
318.9	2074.43
319.2	2072.87
319.5	2071.31
319.8	2069.73
320.1	2068.1
320.4	2066.4
320.7	2064.61
321	2062.73
321.3	2060.74
321.6	2058.64
321.9	2056.45
322.2	2054.16
322.5	2051.8
322.8	2049.39
323.1	2046.94
323.4	2044.5
323.7	2042.08
324	2039.71
324.3	2037.42
324.6	2035.25
324.9	2033.21
325.2	2031.32
325.5	2029.6
325.8	2028.06
326.1	2026.71
326.4	2025.55
326.7	2024.56
327	2023.74
327.3	2023.07
327.6	2022.53
327.9	2022.09
328.2	2021.72
328.5	2021.41
328.8	2021.11
329.1	2020.79
329.4	2020.44
329.7	2020.02
330	2019.51
330.3	2018.9
330.6	2018.16
330.9	2017.3
331.2	2016.29
331.5	2015.15
331.8	2013.88
332.1	2012.48
332.4	2010.98
332.7	2009.37
333	2007.69
333.3	2005.95
333.6	2004.17
333.9	2002.38
334.2	2000.6
334.5	1998.84
334.8	1997.13
335.1	1995.49
335.4	1993.92
335.7	1992.45
336	1991.08
336.3	1989.83
336.6	1988.69
336.9	1987.67
337.2	1986.76
337.5	1985.97
337.8	1985.28
338.1	1984.7
338.4	1984.2
338.7	1983.78
339	1983.44
339.3	1983.15
339.6	1982.9
339.9	1982.69
340.2	1982.51
340.5	1982.34
340.8	1982.19
341.1	1982.03
341.4	1981.88
341.7	1981.72
342	1981.56
342.3	1981.4
342.6	1981.23
342.9	1981.07
343.2	1980.91
343.5	1980.76
343.8	1980.63
344.1	1980.51
344.4	1980.42
344.7	1980.36
345	1980.33
345.3	1980.32
345.6	1980.35
345.9	1980.41
346.2	1980.49
346.5	1980.6
346.8	1980.73
347.1	1980.87
347.4	1981.01
347.7	1981.15
348	1981.29
348.3	1981.41
348.6	1981.52
348.9	1981.6
349.2	1981.66
349.5	1981.69
349.8	1981.7
350.1	1981.68
350.4	1981.64
350.7	1981.59
351	1981.52
351.3	1981.45
351.6	1981.39
351.9	1981.35
352.2	1981.32
352.5	1981.33
352.8	1981.37
353.1	1981.46
353.4	1981.61
353.7	1981.81
354	1982.06
354.3	1982.38
354.6	1982.76
354.9	1983.19
355.2	1983.68
355.5	1984.21
355.8	1984.79
356.1	1985.4
356.4	1986.03
356.7	1986.68
357	1987.33
357.3	1987.99
357.6	1988.63
357.9	1989.25
358.2	1989.85
358.5	1990.41
358.8	1990.94
359.1	1991.43
359.4	1991.88
359.7	1992.28
360	1992.64
360.3	1992.97
360.6	1993.25
360.9	1993.5
361.2	1993.73
361.5	1993.93
361.8	1994.12
362.1	1994.29
362.4	1994.46
362.7	1994.62
363	1994.8
363.3	1994.98
363.6	1995.18
363.9	1995.39
364.2	1995.62
364.5	1995.88
364.8	1996.16
365.1	1996.47
365.4	1996.81
365.7	1997.17
366	1997.57
366.3	1998
366.6	1998.47
366.9	1998.96
367.2	1999.5
367.5	2000.07
367.8	2000.68
368.1	2001.33
368.4	2002.02
368.7	2002.75
369	2003.52
369.3	2004.32
369.6	2005.15
369.9	2006.01
370.2	2006.89
370.5	2007.78
370.8	2008.68
371.1	2009.56
371.4	2010.44
371.7	2011.28
372	2012.09
372.3	2012.85
372.6	2013.55
372.9	2014.19
373.2	2014.76
373.5	2015.27
373.8	2015.71
374.1	2016.09
374.4	2016.41
374.7	2016.69
375	2016.94
375.3	2017.17
375.6	2017.4
375.9	2017.65
376.2	2017.94
376.5	2018.28
376.8	2018.7
377.1	2019.19
377.4	2019.78
377.7	2020.47
378	2021.25
378.3	2022.13
378.6	2023.09
378.9	2024.12
379.2	2025.21
379.5	2026.32
379.8	2027.44
380.1	2028.55
380.4	2029.6
380.7	2030.59
381	2031.47
381.3	2032.25
381.6	2032.89
381.9	2033.39
382.2	2033.74
382.5	2033.95
382.8	2034.02
383.1	2033.97
383.4	2033.81
383.7	2033.59
384	2033.31
384.3	2033.03
384.6	2032.76
384.9	2032.56
385.2	2032.44
385.5	2032.44
385.8	2032.6
386.1	2032.92
386.4	2033.42
386.7	2034.12
387	2035.02
387.3	2036.12
387.6	2037.39
387.9	2038.84
388.2	2040.43
388.5	2042.14
388.8	2043.95
389.1	2045.81
389.4	2047.71
389.7	2049.6
390	2051.47
390.3	2053.27
390.6	2054.99
390.9	2056.6
391.2	2058.08
391.5	2059.43
391.8	2060.62
392.1	2061.67
392.4	2062.56
392.7	2063.29
393	2063.88
393.3	2064.32
393.6	2064.64
393.9	2064.84
394.2	2064.94
394.5	2064.96
394.8	2064.91
395.1	2064.82
395.4	2064.7
395.7	2064.58
396	2064.48
396.3	2064.42
396.6	2064.43
396.9	2064.52
397.2	2064.71
397.5	2065.02
397.8	2065.47
398.1	2066.07
398.4	2066.81
398.7	2067.71
399	2068.77
399.3	2069.97
399.6	2071.31
399.9	2072.76
400.2	2074.3
400.5	2075.9
400.8	2077.55
401.1	2079.19
401.4	2080.8
401.7	2082.35
402	2083.79
402.3	2085.12
402.6	2086.29
402.9	2087.29
403.2	2088.1
403.5	2088.73
403.8	2089.17
404.1	2089.42
404.4	2089.5
404.7	2089.44
405	2089.26
405.3	2088.98
405.6	2088.65
405.9	2088.3
406.2	2087.97
406.5	2087.68
406.8	2087.48
407.1	2087.4
407.4	2087.46
407.7	2087.7
408	2088.14
408.3	2088.79
408.6	2089.68
408.9	2090.84
409.2	2092.26
409.5	2093.99
409.8	2096.03
410.1	2098.42
410.4	2101.17
410.7	2104.31
411	2107.89
411.3	2111.91
411.6	2116.43
411.9	2121.46
412.2	2127.02
412.5	2133.15
412.8	2139.84
413.1	2147.09
413.4	2154.9
413.7	2163.23
414	2172.04
414.3	2181.26
414.6	2190.81
414.9	2200.61
415.2	2210.54
415.5	2220.46
415.8	2230.26
416.1	2239.78
416.4	2248.87
416.7	2257.4
417	2265.21
417.3	2272.17
417.6	2278.17
417.9	2283.1
418.2	2286.87
418.5	2289.42
418.8	2290.73
419.1	2290.76
419.4	2289.55
419.7	2287.13
420	2283.57
420.3	2278.95
420.6	2273.37
420.9	2266.97
421.2	2259.86
421.5	2252.19
421.8	2244.11
422.1	2235.75
422.4	2227.26
422.7	2218.77
423	2210.41
423.3	2202.28
423.6	2194.48
423.9	2187.09
424.2	2180.17
424.5	2173.78
424.8	2167.96
425.1	2162.71
425.4	2158.04
425.7	2153.96
426	2150.45
426.3	2147.47
426.6	2145.02
426.9	2143.04
427.2	2141.51
427.5	2140.38
427.8	2139.63
428.1	2139.2
428.4	2139.07
428.7	2139.2
429	2139.56
429.3	2140.12
429.6	2140.85
429.9	2141.72
430.2	2142.72
430.5	2143.82
430.8	2145
431.1	2146.24
431.4	2147.53
431.7	2148.84
432	2150.16
432.3	2151.47
432.6	2152.76
432.9	2154.01
433.2	2155.21
433.5	2156.34
433.8	2157.4
434.1	2158.36
434.4	2159.22
434.7	2159.98
435	2160.62
435.3	2161.15
435.6	2161.56
435.9	2161.85
436.2	2162.02
436.5	2162.09
436.8	2162.05
437.1	2161.92
437.4	2161.7
437.7	2161.41
438	2161.06
438.3	2160.66
438.6	2160.24
438.9	2159.79
439.2	2159.34
439.5	2158.91
439.8	2158.49
440.1	2158.12
440.4	2157.79
440.7	2157.52
441	2157.33
441.3	2157.21
441.6	2157.19
441.9	2157.26
442.2	2157.44
442.5	2157.72
442.8	2158.13
443.1	2158.65
443.4	2159.29
443.7	2160.06
444	2160.95
444.3	2161.96
444.6	2163.09
444.9	2164.33
445.2	2165.68
445.5	2167.12
445.8	2168.64
446.1	2170.23
446.4	2171.87
446.7	2173.54
447	2175.21
447.3	2176.87
447.6	2178.49
447.9	2180.05
448.2	2181.52
448.5	2182.87
448.8	2184.08
449.1	2185.14
449.4	2186.01
449.7	2186.69
450	2187.17
450.3	2187.44
450.6	2187.49
450.9	2187.33
451.2	2186.96
451.5	2186.39
451.8	2185.64
452.1	2184.73
452.4	2183.67
452.7	2182.49
453	2181.22
453.3	2179.87
453.6	2178.47
453.9	2177.05
454.2	2175.62
454.5	2174.2
454.8	2172.8
455.1	2171.44
455.4	2170.12
455.7	2168.83
456	2167.59
456.3	2166.39
456.6	2165.21
456.9	2164.04
457.2	2162.87
457.5	2161.7
457.8	2160.49
458.1	2159.25
458.4	2157.96
458.7	2156.62
459	2155.21
459.3	2153.74
459.6	2152.2
459.9	2150.62
460.2	2148.99
460.5	2147.33
460.8	2145.66
461.1	2144.01
461.4	2142.39
461.7	2140.82
462	2139.34
462.3	2137.96
462.6	2136.71
462.9	2135.61
463.2	2134.66
463.5	2133.88
463.8	2133.28
464.1	2132.85
464.4	2132.59
464.7	2132.5
465	2132.54
465.3	2132.71
465.6	2132.98
465.9	2133.33
466.2	2133.73
466.5	2134.15
466.8	2134.57
467.1	2134.96
467.4	2135.31
467.7	2135.59
468	2135.78
468.3	2135.89
468.6	2135.9
468.9	2135.81
469.2	2135.62
469.5	2135.34
469.8	2134.99
470.1	2134.57
470.4	2134.1
470.7	2133.59
471	2133.05
471.3	2132.5
471.6	2131.95
471.9	2131.4
472.2	2130.87
472.5	2130.36
472.8	2129.86
473.1	2129.38
473.4	2128.92
473.7	2128.45
474	2127.98
474.3	2127.51
474.6	2127.01
474.9	2126.49
475.2	2125.93
475.5	2125.34
475.8	2124.7
476.1	2124.02
476.4	2123.3
476.7	2122.53
477	2121.73
477.3	2120.88
477.6	2120.01
477.9	2119.11
478.2	2118.19
478.5	2117.25
478.8	2116.3
479.1	2115.33
479.4	2114.35
479.7	2113.36
480	2112.34
480.3	2111.32
480.6	2110.27
480.9	2109.19
481.2	2108.09
481.5	2106.97
481.8	2105.82
482.1	2104.66
482.4	2103.48
482.7	2102.29
483	2101.11
483.3	2099.95
483.6	2098.82
483.9	2097.74
484.2	2096.72
484.5	2095.79
484.8	2094.95
485.1	2094.21
485.4	2093.6
485.7	2093.1
486	2092.73
486.3	2092.48
486.6	2092.35
486.9	2092.32
487.2	2092.37
487.5	2092.5
487.8	2092.68
488.1	2092.89
488.4	2093.1
488.7	2093.31
489	2093.47
489.3	2093.59
489.6	2093.65
489.9	2093.64
490.2	2093.56
490.5	2093.41
490.8	2093.19
491.1	2092.91
491.4	2092.6
491.7	2092.27
492	2091.93
492.3	2091.61
492.6	2091.32
492.9	2091.08
493.2	2090.9
493.5	2090.8
493.8	2090.78
494.1	2090.84
494.4	2090.97
494.7	2091.16
495	2091.4
495.3	2091.67
495.6	2091.94
495.9	2092.19
496.2	2092.4
496.5	2092.52
496.8	2092.55
497.1	2092.45
497.4	2092.2
497.7	2091.8
498	2091.22
498.3	2090.47
498.6	2089.54
498.9	2088.44
499.2	2087.19
499.5	2085.79
499.8	2084.26
500.1	2082.63
500.4	2080.93
500.7	2079.17
501	2077.39
501.3	2075.61
501.6	2073.86
501.9	2072.15
502.2	2070.5
502.5	2068.94
502.8	2067.47
503.1	2066.09
503.4	2064.82
503.7	2063.66
504	2062.59
504.3	2061.62
504.6	2060.75
504.9	2059.96
505.2	2059.23
505.5	2058.58
505.8	2057.97
506.1	2057.4
506.4	2056.87
506.7	2056.36
507	2055.86
507.3	2055.38
507.6	2054.9
507.9	2054.42
508.2	2053.95
508.5	2053.47
508.8	2053
509.1	2052.52
509.4	2052.05
509.7	2051.59
510	2051.13
510.3	2050.69
510.6	2050.26
510.9	2049.85
511.2	2049.46
511.5	2049.1
511.8	2048.76
512.1	2048.45
512.4	2048.17
512.7	2047.91
513	2047.69
513.3	2047.5
513.6	2047.33
513.9	2047.2
514.2	2047.1
514.5	2047.02
514.8	2046.98
515.1	2046.96
515.4	2046.96
515.7	2046.99
516	2047.04
516.3	2047.11
516.6	2047.19
516.9	2047.28
517.2	2047.39
517.5	2047.5
517.8	2047.6
518.1	2047.7
518.4	2047.79
518.7	2047.85
519	2047.9
519.3	2047.9
519.6	2047.87
519.9	2047.8
520.2	2047.67
520.5	2047.49
520.8	2047.24
521.1	2046.93
521.4	2046.55
521.7	2046.1
522	2045.58
522.3	2044.99
522.6	2044.32
522.9	2043.59
523.2	2042.79
523.5	2041.93
523.8	2041
524.1	2040.02
524.4	2038.99
524.7	2037.92
525	2036.81
525.3	2035.67
525.6	2034.51
525.9	2033.34
526.2	2032.17
526.5	2031.01
526.8	2029.88
527.1	2028.78
527.4	2027.74
527.7	2026.76
528	2025.85
528.3	2025.04
528.6	2024.32
528.9	2023.71
529.2	2023.21
529.5	2022.83
529.8	2022.55
530.1	2022.38
530.4	2022.29
530.7	2022.28
531	2022.32
531.3	2022.39
531.6	2022.46
531.9	2022.5
532.2	2022.48
532.5	2022.36
532.8	2022.13
533.1	2021.74
533.4	2021.18
533.7	2020.43
534	2019.48
534.3	2018.32
534.6	2016.95
534.9	2015.39
535.2	2013.65
535.5	2011.74
535.8	2009.71
536.1	2007.58
536.4	2005.4
536.7	2003.19
537	2000.99
537.3	1998.85
537.6	1996.8
537.9	1994.87
538.2	1993.09
538.5	1991.47
538.8	1990.02
539.1	1988.77
539.4	1987.7
539.7	1986.81
540	1986.1
540.3	1985.55
540.6	1985.14
540.9	1984.86
541.2	1984.7
541.5	1984.62
541.8	1984.62
542.1	1984.69
542.4	1984.81
542.7	1984.97
543	1985.17
543.3	1985.42
543.6	1985.7
543.9	1986.02
544.2	1986.39
544.5	1986.81
544.8	1987.27
545.1	1987.78
545.4	1988.34
545.7	1988.94
546	1989.58
546.3	1990.24
546.6	1990.92
546.9	1991.59
547.2	1992.23
547.5	1992.83
547.8	1993.37
548.1	1993.83
548.4	1994.18
548.7	1994.41
549	1994.52
549.3	1994.48
549.6	1994.29
549.9	1993.95
550.2	1993.47
550.5	1992.85
550.8	1992.11
551.1	1991.25
551.4	1990.31
551.7	1989.29
552	1988.22
552.3	1987.13
552.6	1986.03
552.9	1984.96
553.2	1983.92
553.5	1982.93
553.8	1982.01
554.1	1981.17
554.4	1980.42
554.7	1979.75
555	1979.17
555.3	1978.68
555.6	1978.26
555.9	1977.91
556.2	1977.61
556.5	1977.36
556.8	1977.15
557.1	1976.96
557.4	1976.77
557.7	1976.58
558	1976.38
558.3	1976.16
558.6	1975.92
558.9	1975.64
559.2	1975.32
559.5	1974.96
559.8	1974.56
560.1	1974.12
560.4	1973.63
560.7	1973.1
561	1972.51
561.3	1971.88
561.6	1971.2
561.9	1970.47
562.2	1969.68
562.5	1968.83
562.8	1967.93
563.1	1966.96
563.4	1965.92
563.7	1964.83
564	1963.67
564.3	1962.46
564.6	1961.2
564.9	1959.9
565.2	1958.57
565.5	1957.22
565.8	1955.87
566.1	1954.53
566.4	1953.23
566.7	1951.98
567	1950.79
567.3	1949.69
567.6	1948.68
567.9	1947.79
568.2	1947.01
568.5	1946.37
568.8	1945.85
569.1	1945.46
569.4	1945.2
569.7	1945.06
570	1945.04
570.3	1945.12
570.6	1945.29
570.9	1945.55
571.2	1945.87
571.5	1946.27
571.8	1946.71
572.1	1947.21
572.4	1947.75
572.7	1948.34
573	1948.96
573.3	1949.63
573.6	1950.35
573.9	1951.11
574.2	1951.92
574.5	1952.77
574.8	1953.67
575.1	1954.6
575.4	1955.56
575.7	1956.54
576	1957.51
576.3	1958.45
576.6	1959.34
576.9	1960.16
577.2	1960.87
577.5	1961.45
577.8	1961.86
578.1	1962.09
578.4	1962.1
578.7	1961.88
579	1961.42
579.3	1960.7
579.6	1959.73
579.9	1958.52
580.2	1957.07
580.5	1955.41
580.8	1953.57
581.1	1951.57
581.4	1949.45
581.7	1947.26
582	1945.03
582.3	1942.8
582.6	1940.62
582.9	1938.5
583.2	1936.5
583.5	1934.62
583.8	1932.89
584.1	1931.32
584.4	1929.92
584.7	1928.68
585	1927.59
585.3	1926.65
585.6	1925.82
585.9	1925.09
586.2	1924.43
586.5	1923.81
586.8	1923.22
587.1	1922.61
587.4	1921.98
587.7	1921.3
588	1920.56
588.3	1919.75
588.6	1918.87
588.9	1917.92
589.2	1916.9
589.5	1915.84
589.8	1914.74
590.1	1913.62
590.4	1912.51
590.7	1911.44
591	1910.41
591.3	1909.46
591.6	1908.6
591.9	1907.85
592.2	1907.22
592.5	1906.71
592.8	1906.34
593.1	1906.09
593.4	1905.96
593.7	1905.93
594	1905.99
594.3	1906.12
594.6	1906.3
594.9	1906.5
595.2	1906.69
595.5	1906.86
595.8	1906.98
596.1	1907.03
596.4	1906.99
596.7	1906.85
597	1906.6
597.3	1906.23
597.6	1905.74
597.9	1905.13
598.2	1904.41
598.5	1903.59
598.8	1902.67
599.1	1901.69
599.4	1900.64
[truncated: 12,502 more rows]

## Sheet: Site 1-4
Raman shift (cm-1)	count
0	1096.72
0.3	1107.07
0.6	1115.76
0.9	1122.92
1.2	1128.76
1.5	1133.52
1.8	1137.43
2.1	1140.75
2.4	1143.73
2.7	1146.63
3	1149.64
3.3	1152.98
3.6	1156.81
3.9	1161.24
4.2	1166.38
4.5	1172.27
4.8	1178.93
5.1	1186.34
5.4	1194.44
5.7	1203.17
6	1212.42
6.3	1222.07
6.6	1232.01
6.9	1242.08
7.2	1252.15
7.5	1262.07
7.8	1271.71
8.1	1280.93
8.4	1289.6
8.7	1297.61
9	1304.84
9.3	1311.19
9.6	1316.59
9.9	1320.95
10.2	1324.21
10.5	1326.34
10.8	1327.29
11.1	1327.06
11.4	1325.64
11.7	1323.07
12	1319.39
12.3	1314.66
12.6	1308.99
12.9	1302.48
13.2	1295.28
13.5	1287.55
13.8	1279.48
14.1	1271.26
14.4	1263.14
14.7	1255.33
15	1248.08
15.3	1241.66
15.6	1236.28
15.9	1232.19
16.2	1229.62
16.5	1228.74
16.8	1229.73
17.1	1232.71
17.4	1237.77
17.7	1244.97
18	1254.29
18.3	1265.68
18.6	1279.04
18.9	1294.22
19.2	1311.02
19.5	1329.22
19.8	1348.53
20.1	1368.66
20.4	1389.3
20.7	1410.1
21	1430.73
21.3	1450.87
21.6	1470.2
21.9	1488.42
22.2	1505.27
22.5	1520.5
22.8	1533.94
23.1	1545.42
23.4	1554.82
23.7	1562.09
24	1567.19
24.3	1570.12
24.6	1570.94
24.9	1569.7
25.2	1566.51
25.5	1561.46
25.8	1554.69
26.1	1546.32
26.4	1536.49
26.7	1525.32
27	1512.93
27.3	1499.46
27.6	1485.01
27.9	1469.7
28.2	1453.63
28.5	1436.91
28.8	1419.65
29.1	1401.96
29.4	1383.97
29.7	1365.8
30	1347.61
30.3	1329.57
30.6	1311.84
30.9	1294.61
31.2	1278.1
31.5	1262.51
31.8	1248.04
32.1	1234.92
32.4	1223.33
32.7	1213.46
33	1205.47
33.3	1199.48
33.6	1195.59
33.9	1193.85
34.2	1194.27
34.5	1196.81
34.8	1201.4
35.1	1207.91
35.4	1216.2
35.7	1226.05
36	1237.27
36.3	1249.63
36.6	1262.88
36.9	1276.78
37.2	1291.13
37.5	1305.71
37.8	1320.35
38.1	1334.91
38.4	1349.29
38.7	1363.43
39	1377.32
39.3	1390.97
39.6	1404.46
39.9	1417.87
40.2	1431.32
40.5	1444.93
40.8	1458.86
41.1	1473.22
41.4	1488.14
41.7	1503.73
42	1520.04
42.3	1537.12
42.6	1554.94
42.9	1573.44
43.2	1592.53
43.5	1612.04
43.8	1631.77
44.1	1651.5
44.4	1670.95
44.7	1689.81
45	1707.79
45.3	1724.56
45.6	1739.8
45.9	1753.22
46.2	1764.53
46.5	1773.48
46.8	1779.88
47.1	1783.56
47.4	1784.43
47.7	1782.44
48	1777.6
48.3	1770
48.6	1759.77
48.9	1747.11
49.2	1732.28
49.5	1715.58
49.8	1697.35
50.1	1677.97
50.4	1657.86
50.7	1637.43
51	1617.12
51.3	1597.37
51.6	1578.58
51.9	1561.16
52.2	1545.47
52.5	1531.83
52.8	1520.53
53.1	1511.78
53.4	1505.74
53.7	1502.53
54	1502.16
54.3	1504.62
54.6	1509.81
54.9	1517.56
55.2	1527.69
55.5	1539.93
55.8	1553.99
56.1	1569.56
56.4	1586.29
56.7	1603.84
57	1621.9
57.3	1640.12
57.6	1658.22
57.9	1675.96
58.2	1693.12
58.5	1709.54
58.8	1725.13
59.1	1739.82
59.4	1753.63
59.7	1766.62
60	1778.87
60.3	1790.54
60.6	1801.78
60.9	1812.79
61.2	1823.75
61.5	1834.85
61.8	1846.26
62.1	1858.12
62.4	1870.55
62.7	1883.6
63	1897.31
63.3	1911.65
63.6	1926.52
63.9	1941.83
64.2	1957.39
64.5	1972.99
64.8	1988.4
65.1	2003.38
65.4	2017.65
65.7	2030.97
66	2043.07
66.3	2053.74
66.6	2062.78
66.9	2070.04
67.2	2075.4
67.5	2078.81
67.8	2080.24
68.1	2079.72
68.4	2077.36
68.7	2073.25
69	2067.56
69.3	2060.49
69.6	2052.23
69.9	2043.03
70.2	2033.12
70.5	2022.73
70.8	2012.11
71.1	2001.47
71.4	1991.02
71.7	1980.97
72	1971.5
72.3	1962.76
72.6	1954.91
72.9	1948.06
73.2	1942.34
73.5	1937.85
73.8	1934.67
74.1	1932.89
74.4	1932.57
74.7	1933.77
75	1936.54
75.3	1940.89
75.6	1946.84
75.9	1954.37
76.2	1963.43
76.5	1973.96
76.8	1985.85
77.1	1998.94
77.4	2013.08
77.7	2028.02
78	2043.51
78.3	2059.27
78.6	2074.97
78.9	2090.29
79.2	2104.88
79.5	2118.39
79.8	2130.5
80.1	2140.91
80.4	2149.34
80.7	2155.6
81	2159.55
81.3	2161.1
81.6	2160.27
81.9	2157.17
82.2	2151.95
82.5	2144.93
82.8	2136.42
83.1	2126.85
83.4	2116.72
83.7	2106.54
84	2096.87
84.3	2088.26
84.6	2081.28
84.9	2076.41
85.2	2074.15
85.5	2074.88
85.8	2078.89
86.1	2086.43
86.4	2097.56
86.7	2112.31
87	2130.56
87.3	2152.05
87.6	2176.5
87.9	2203.48
88.2	2232.51
88.5	2263.07
88.8	2294.6
89.1	2326.53
89.4	2358.3
89.7	2389.42
90	2419.39
90.3	2447.87
90.6	2474.53
90.9	2499.18
91.2	2521.75
91.5	2542.23
91.8	2560.76
92.1	2577.56
92.4	2592.93
92.7	2607.26
93	2620.99
93.3	2634.59
93.6	2648.56
93.9	2663.4
94.2	2679.57
94.5	2697.49
94.8	2717.57
95.1	2740.09
95.4	2765.3
95.7	2793.35
96	2824.3
96.3	2858.17
96.6	2894.87
96.9	2934.28
97.2	2976.21
97.5	3020.46
97.8	3066.81
98.1	3115.03
98.4	3164.95
98.7	3216.38
99	3269.25
99.3	3323.5
99.6	3379.17
99.9	3436.38
100.2	3495.31
100.5	3556.25
100.8	3619.55
101.1	3685.61
101.4	3754.93
101.7	3828.02
102	3905.43
102.3	3987.73
102.6	4075.51
102.9	4169.31
103.2	4269.68
103.5	4377.15
103.8	4492.15
104.1	4615.15
104.4	4746.52
104.7	4886.6
105	5035.69
105.3	5194.08
105.6	5362.01
105.9	5539.73
106.2	5727.47
106.5	5925.49
106.8	6134.06
107.1	6353.49
107.4	6584.12
107.7	6826.33
108	7080.55
108.3	7347.24
108.6	7626.92
108.9	7920.1
109.2	8227.31
109.5	8549.11
109.8	8885.99
110.1	9238.39
110.4	9606.73
110.7	9991.28
111	10392.2
111.3	10809.6
111.6	11243.2
111.9	11692.9
112.2	12158.1
112.5	12638.1
112.8	13132
113.1	13638.7
113.4	14157
113.7	14685.3
114	15222
114.3	15765.2
114.6	16313.2
114.9	16863.8
115.2	17414.9
115.5	17964.5
115.8	18510.4
116.1	19050.5
116.4	19582.7
116.7	20105.2
117	20616
117.3	21113.5
117.6	21596
117.9	22062.3
118.2	22511
118.5	22941
118.8	23351.6
119.1	23742
119.4	24111.5
119.7	24459.9
120	24786.7
120.3	25092
120.6	25375.5
120.9	25637.3
121.2	25877.5
121.5	26096.2
121.8	26293.7
122.1	26470.3
122.4	26626.1
122.7	26761.4
123	26876.7
123.3	26972.1
123.6	27048.2
123.9	27105.3
124.2	27143.8
124.5	27164.2
124.8	27167
125.1	27152.9
125.4	27122.4
125.7	27076.3
126	27015.2
126.3	26940.1
126.6	26851.7
126.9	26751
127.2	26639
127.5	26516.6
127.8	26384.9
128.1	26245
128.4	26097.8
128.7	25944.3
129	25785.6
129.3	25622.7
129.6	25456.5
129.9	25287.8
130.2	25117.6
130.5	24946.4
130.8	24775.1
131.1	24604.3
131.4	24434.6
131.7	24266.5
132	24100.4
132.3	23936.8
132.6	23776.1
132.9	23618.5
133.2	23464.4
133.5	23314.1
133.8	23167.7
134.1	23025.6
134.4	22887.9
134.7	22754.8
135	22626.4
135.3	22502.9
135.6	22384.4
135.9	22270.9
136.2	22162.5
136.5	22059.2
136.8	21960.9
137.1	21867.5
137.4	21779
137.7	21695.3
138	21616.1
138.3	21541.2
138.6	21470.5
138.9	21403.7
139.2	21340.5
139.5	21280.8
139.8	21224.3
140.1	21170.8
140.4	21120.1
140.7	21071.9
141	21026.3
141.3	20983
141.6	20941.9
141.9	20903.1
142.2	20866.3
142.5	20831.8
142.8	20799.3
143.1	20769
143.4	20740.7
143.7	20714.6
144	20690.6
144.3	20668.6
144.6	20648.5
144.9	20630.4
145.2	20613.9
145.5	20599
145.8	20585.5
146.1	20573.1
146.4	20561.7
146.7	20550.9
147	20540.5
147.3	20530.2
147.6	20519.8
147.9	20509
148.2	20497.7
148.5	20485.5
148.8	20472.4
149.1	20458.3
149.4	20443.1
149.7	20426.8
150	20409.4
150.3	20391
150.6	20371.6
150.9	20351.4
151.2	20330.6
151.5	20309.4
151.8	20288
152.1	20266.6
152.4	20245.3
152.7	20224.5
153	20204.4
153.3	20185
153.6	20166.7
153.9	20149.5
154.2	20133.6
154.5	20119.1
154.8	20106.1
155.1	20094.7
155.4	20084.9
155.7	20076.8
156	20070.4
156.3	20065.6
156.6	20062.5
156.9	20061
157.2	20061.2
157.5	20063
157.8	20066.3
158.1	20071.1
158.4	20077.5
158.7	20085.2
159	20094.3
159.3	20104.7
159.6	20116.4
159.9	20129.2
160.2	20143.1
160.5	20158
160.8	20173.8
161.1	20190.4
161.4	20207.7
161.7	20225.5
162	20243.7
162.3	20262.2
162.6	20280.7
162.9	20299.2
163.2	20317.3
163.5	20335
163.8	20352.1
164.1	20368.2
164.4	20383.2
164.7	20396.9
165	20409
165.3	20419.4
165.6	20427.7
165.9	20433.8
166.2	20437.4
166.5	20438.4
166.8	20436.6
167.1	20431.8
167.4	20423.8
167.7	20412.6
168	20398
168.3	20380
168.6	20358.5
168.9	20333.7
169.2	20305.4
169.5	20273.9
169.8	20239.2
170.1	20201.5
170.4	20160.9
170.7	20117.7
171	20072.1
171.3	20024.4
171.6	19974.8
171.9	19923.7
172.2	19871.2
172.5	19817.7
172.8	19763.5
173.1	19708.8
173.4	19653.9
173.7	19598.9
174	19544.1
174.3	19489.7
174.6	19435.7
174.9	19382.3
175.2	19329.7
175.5	19277.8
175.8	19226.6
176.1	19176.3
176.4	19126.8
176.7	19078
177	19030
177.3	18982.7
177.6	18936.1
177.9	18890.1
178.2	18844.7
178.5	18799.8
178.8	18755.4
179.1	18711.5
179.4	18668.1
179.7	18625.2
180	18582.7
180.3	18540.8
180.6	18499.3
180.9	18458.3
181.2	18417.9
181.5	18378
181.8	18338.8
182.1	18300.1
182.4	18262
182.7	18224.5
183	18187.7
183.3	18151.3
183.6	18115.5
183.9	18080.2
184.2	18045.2
184.5	18010.6
184.8	17976.2
185.1	17942
185.4	17907.7
185.7	17873.4
186	17838.8
186.3	17803.9
186.6	17768.5
186.9	17732.5
187.2	17695.9
187.5	17658.4
187.8	17620.1
188.1	17580.9
188.4	17540.7
188.7	17499.4
189	17457.2
189.3	17414
189.6	17369.7
189.9	17324.6
190.2	17278.6
190.5	17231.9
190.8	17184.5
191.1	17136.6
191.4	17088.3
191.7	17039.6
192	16990.8
192.3	16941.9
192.6	16893.1
192.9	16844.4
193.2	16795.9
193.5	16747.7
193.8	16699.9
194.1	16652.5
194.4	16605.4
194.7	16558.7
195	16512.3
195.3	16466.2
195.6	16420.3
195.9	16374.6
196.2	16328.9
196.5	16283.2
196.8	16237.4
197.1	16191.5
197.4	16145.2
197.7	16098.7
198	16051.8
198.3	16004.4
198.6	15956.7
198.9	15908.6
199.2	15860
199.5	15811.1
199.8	15761.9
200.1	15712.4
200.4	15662.7
200.7	15612.9
201	15563.1
201.3	15513.3
201.6	15463.6
201.9	15414.1
202.2	15364.8
202.5	15315.7
202.8	15267
203.1	15218.5
203.4	15170.3
203.7	15122.4
204	15074.7
204.3	15027.2
204.6	14980
204.9	14932.8
205.2	14885.8
205.5	14838.8
205.8	14791.9
206.1	14744.9
206.4	14698
206.7	14651
207	14603.9
207.3	14556.9
207.6	14509.9
207.9	14462.9
208.2	14415.9
208.5	14369.1
208.8	14322.4
209.1	14275.9
209.4	14229.6
209.7	14183.4
210	14137.6
210.3	14091.9
210.6	14046.5
210.9	14001.2
211.2	13956.1
211.5	13911
211.8	13866.1
212.1	13821.1
212.4	13776
212.7	13730.8
213	13685.4
213.3	13639.8
213.6	13593.9
213.9	13547.7
214.2	13501.1
214.5	13454.3
214.8	13407.1
215.1	13359.7
215.4	13312.1
215.7	13264.3
216	13216.4
216.3	13168.6
216.6	13120.8
216.9	13073.2
217.2	13025.8
217.5	12978.7
217.8	12932.1
218.1	12885.8
218.4	12840
218.7	12794.7
219	12749.9
219.3	12705.5
219.6	12661.6
219.9	12618.2
220.2	12575
220.5	12532.2
220.8	12489.6
221.1	12447.1
221.4	12404.8
221.7	12362.5
222	12320.2
222.3	12277.9
222.6	12235.5
222.9	12193
223.2	12150.4
223.5	12107.7
223.8	12065
224.1	12022.3
224.4	11979.6
224.7	11937
225	11894.5
225.3	11852.3
225.6	11810.4
225.9	11768.8
226.2	11727.6
226.5	11686.9
226.8	11646.7
227.1	11606.9
227.4	11567.8
227.7	11529.1
228	11491.1
228.3	11453.5
228.6	11416.4
228.9	11379.8
229.2	11343.7
229.5	11307.9
229.8	11272.4
230.1	11237.3
230.4	11202.4
230.7	11167.6
231	11133
231.3	11098.5
231.6	11064.1
231.9	11029.8
232.2	10995.4
232.5	10961
232.8	10926.7
233.1	10892.3
233.4	10857.8
233.7	10823.4
234	10788.8
234.3	10754.3
234.6	10719.8
234.9	10685.2
235.2	10650.6
235.5	10616
235.8	10581.5
236.1	10547
236.4	10512.5
236.7	10478.2
237	10443.9
237.3	10409.7
237.6	10375.6
237.9	10341.7
238.2	10308
238.5	10274.4
238.8	10241
239.1	10207.8
239.4	10174.8
239.7	10142.1
240	10109.5
240.3	10077.2
240.6	10045
240.9	10013.1
241.2	9981.28
241.5	9949.66
241.8	9918.17
242.1	9886.8
242.4	9855.52
242.7	9824.32
243	9793.17
243.3	9762.07
243.6	9730.99
243.9	9699.93
244.2	9668.9
244.5	9637.88
244.8	9606.88
245.1	9575.92
245.4	9545.01
245.7	9514.16
246	9483.38
246.3	9452.68
246.6	9422.09
246.9	9391.6
247.2	9361.23
247.5	9330.97
247.8	9300.81
248.1	9270.75
248.4	9240.76
248.7	9210.82
249	9180.9
249.3	9150.97
249.6	9121
249.9	9090.95
250.2	9060.8
250.5	9030.51
250.8	9000.07
251.1	8969.45
251.4	8938.65
251.7	8907.68
252	8876.55
252.3	8845.27
252.6	8813.89
252.9	8782.43
253.2	8750.96
253.5	8719.51
253.8	8688.16
254.1	8656.95
254.4	8625.96
254.7	8595.23
255	8564.82
255.3	8534.77
255.6	8505.12
255.9	8475.9
256.2	8447.13
256.5	8418.81
256.8	8390.93
257.1	8363.5
257.4	8336.48
257.7	8309.84
258	8283.55
258.3	8257.57
258.6	8231.86
258.9	8206.37
259.2	8181.05
259.5	8155.87
259.8	8130.78
260.1	8105.76
260.4	8080.76
260.7	8055.78
261	8030.78
261.3	8005.75
261.6	7980.69
261.9	7955.59
262.2	7930.45
262.5	7905.26
262.8	7880.04
263.1	7854.78
263.4	7829.5
263.7	7804.19
264	7778.88
264.3	7753.55
264.6	7728.23
264.9	7702.92
265.2	7677.63
265.5	7652.37
265.8	7627.14
266.1	7601.96
266.4	7576.84
266.7	7551.79
267	7526.83
267.3	7501.97
267.6	7477.23
267.9	7452.61
268.2	7428.14
268.5	7403.83
268.8	7379.68
269.1	7355.71
269.4	7331.91
269.7	7308.3
270	7284.86
270.3	7261.61
270.6	7238.52
270.9	7215.59
271.2	7192.8
271.5	7170.15
271.8	7147.62
272.1	7125.19
272.4	7102.85
272.7	7080.59
273	7058.4
273.3	7036.28
273.6	7014.22
273.9	6992.22
274.2	6970.29
274.5	6948.44
274.8	6926.67
275.1	6905.01
275.4	6883.45
275.7	6862.02
276	6840.72
276.3	6819.57
276.6	6798.57
276.9	6777.73
277.2	6757.06
277.5	6736.53
277.8	6716.16
278.1	6695.92
278.4	6675.79
278.7	6655.77
279	6635.83
279.3	6615.94
279.6	6596.08
279.9	6576.24
280.2	6556.38
280.5	6536.5
280.8	6516.58
281.1	6496.61
281.4	6476.59
281.7	6456.52
282	6436.42
282.3	6416.28
282.6	6396.14
282.9	6376.01
283.2	6355.92
283.5	6335.89
283.8	6315.96
284.1	6296.14
284.4	6276.48
284.7	6256.99
285	6237.68
285.3	6218.59
285.6	6199.72
285.9	6181.07
286.2	6162.65
286.5	6144.45
286.8	6126.46
287.1	6108.68
287.4	6091.07
287.7	6073.62
288	6056.3
288.3	6039.1
288.6	6021.99
288.9	6004.95
289.2	5987.96
289.5	5971
289.8	5954.06
290.1	5937.13
290.4	5920.21
290.7	5903.31
291	5886.42
291.3	5869.57
291.6	5852.75
291.9	5836.01
292.2	5819.34
292.5	5802.78
292.8	5786.35
293.1	5770.06
293.4	5753.94
293.7	5738.01
294	5722.27
294.3	5706.73
294.6	5691.41
294.9	5676.3
295.2	5661.39
295.5	5646.69
295.8	5632.17
296.1	5617.82
296.4	5603.63
296.7	5589.58
297	5575.64
297.3	5561.81
297.6	5548.07
297.9	5534.41
298.2	5520.82
298.5	5507.29
298.8	5493.83
299.1	5480.43
299.4	5467.11
299.7	5453.88
300	5440.75
300.3	5427.74
300.6	5414.86
300.9	5402.14
301.2	5389.58
301.5	5377.21
301.8	5365.03
302.1	5353.06
302.4	5341.29
302.7	5329.73
303	5318.37
303.3	5307.22
303.6	5296.25
303.9	5285.45
304.2	5274.83
304.5	5264.35
304.8	5254
305.1	5243.79
305.4	5233.68
305.7	5223.69
306	5213.8
306.3	5204.01
306.6	5194.33
306.9	5184.77
307.2	5175.33
307.5	5166.01
307.8	5156.84
308.1	5147.83
308.4	5138.97
308.7	5130.28
309	5121.76
309.3	5113.41
309.6	5105.23
309.9	5097.19
310.2	5089.3
310.5	5081.52
310.8	5073.85
311.1	5066.25
311.4	5058.7
311.7	5051.17
312	5043.66
312.3	5036.13
312.6	5028.58
312.9	5020.99
313.2	5013.36
313.5	5005.7
313.8	4998.02
314.1	4990.34
314.4	4982.68
314.7	4975.07
315	4967.55
315.3	4960.14
315.6	4952.88
315.9	4945.81
316.2	4938.96
316.5	4932.35
316.8	4925.99
317.1	4919.91
317.4	4914.09
317.7	4908.55
318	4903.25
318.3	4898.19
318.6	4893.33
318.9	4888.64
319.2	4884.07
319.5	4879.6
319.8	4875.17
320.1	4870.75
320.4	4866.3
320.7	4861.79
321	4857.19
321.3	4852.49
321.6	4847.68
321.9	4842.74
322.2	4837.69
322.5	4832.55
322.8	4827.32
323.1	4822.03
323.4	4816.71
323.7	4811.4
324	4806.11
324.3	4800.89
324.6	4795.76
324.9	4790.74
325.2	4785.85
325.5	4781.12
325.8	4776.55
326.1	4772.13
326.4	4767.88
326.7	4763.78
327	4759.81
327.3	4755.98
327.6	4752.25
327.9	4748.61
328.2	4745.03
328.5	4741.51
328.8	4738.02
329.1	4734.56
329.4	4731.1
329.7	4727.64
330	4724.18
330.3	4720.72
330.6	4717.25
330.9	4713.8
331.2	4710.35
331.5	4706.93
331.8	4703.54
332.1	4700.2
332.4	4696.91
332.7	4693.69
333	4690.55
333.3	4687.49
333.6	4684.53
333.9	4681.66
334.2	4678.9
334.5	4676.24
334.8	4673.7
335.1	4671.27
335.4	4668.95
335.7	4666.76
336	4664.69
336.3	4662.74
336.6	4660.93
336.9	4659.24
337.2	4657.7
337.5	4656.3
337.8	4655.04
338.1	4653.93
338.4	4652.97
338.7	4652.14
339	4651.46
339.3	4650.91
339.6	4650.48
339.9	4650.15
340.2	4649.91
340.5	4649.74
340.8	4649.63
341.1	4649.53
341.4	4649.44
341.7	4649.33
342	4649.17
342.3	4648.95
342.6	4648.64
342.9	4648.23
343.2	4647.71
343.5	4647.06
343.8	4646.3
344.1	4645.41
344.4	4644.4
344.7	4643.29
345	4642.09
345.3	4640.81
345.6	4639.49
345.9	4638.13
346.2	4636.76
346.5	4635.41
346.8	4634.1
347.1	4632.85
347.4	4631.68
347.7	4630.61
348	4629.64
348.3	4628.8
348.6	4628.09
348.9	4627.51
349.2	4627.08
349.5	4626.77
349.8	4626.61
350.1	4626.57
350.4	4626.66
350.7	4626.88
351	4627.2
351.3	4627.63
351.6	4628.16
351.9	4628.78
352.2	4629.48
352.5	4630.27
352.8	4631.11
353.1	4632.02
353.4	4632.98
353.7	4633.97
354	4634.99
354.3	4636.03
354.6	4637.06
354.9	4638.08
355.2	4639.07
355.5	4640
355.8	4640.88
356.1	4641.67
356.4	4642.36
356.7	4642.95
357	4643.41
357.3	4643.75
357.6	4643.95
357.9	4644.02
358.2	4643.97
358.5	4643.79
358.8	4643.51
359.1	4643.14
359.4	4642.7
359.7	4642.22
360	4641.72
360.3	4641.24
360.6	4640.79
360.9	4640.41
361.2	4640.12
361.5	4639.94
361.8	4639.9
362.1	4640.01
362.4	4640.27
362.7	4640.69
363	4641.28
363.3	4642.01
363.6	4642.89
363.9	4643.9
364.2	4645.01
364.5	4646.21
364.8	4647.48
365.1	4648.78
365.4	4650.1
365.7	4651.43
366	4652.73
366.3	4654.01
366.6	4655.24
366.9	4656.43
367.2	4657.57
367.5	4658.67
367.8	4659.74
368.1	4660.8
368.4	4661.85
368.7	4662.91
369	4664.01
369.3	4665.16
369.6	4666.37
369.9	4667.67
370.2	4669.06
370.5	4670.55
370.8	4672.15
371.1	4673.86
371.4	4675.67
371.7	4677.58
372	4679.57
372.3	4681.63
372.6	4683.74
372.9	4685.89
373.2	4688.06
373.5	4690.23
373.8	4692.38
374.1	4694.5
374.4	4696.58
374.7	4698.6
375	4700.56
375.3	4702.46
375.6	4704.28
375.9	4706.05
376.2	4707.75
376.5	4709.39
376.8	4710.97
377.1	4712.5
377.4	4713.99
377.7	4715.43
378	4716.83
378.3	4718.19
378.6	4719.5
378.9	4720.76
379.2	4721.96
379.5	4723.1
379.8	4724.17
380.1	4725.16
380.4	4726.06
380.7	4726.88
381	4727.6
381.3	4728.23
381.6	4728.77
381.9	4729.23
382.2	4729.62
382.5	4729.95
382.8	4730.24
383.1	4730.5
383.4	4730.77
383.7	4731.05
384	4731.38
384.3	4731.76
384.6	4732.23
384.9	4732.79
385.2	4733.46
385.5	4734.23
385.8	4735.12
386.1	4736.11
386.4	4737.21
386.7	4738.38
387	4739.63
387.3	4740.92
387.6	4742.25
387.9	4743.57
388.2	4744.89
388.5	4746.16
388.8	4747.39
389.1	4748.55
389.4	4749.65
389.7	4750.67
390	4751.62
390.3	4752.52
390.6	4753.38
390.9	4754.21
391.2	4755.04
391.5	4755.9
391.8	4756.8
392.1	4757.77
392.4	4758.84
392.7	4760.03
393	4761.34
393.3	4762.79
393.6	4764.38
393.9	4766.11
394.2	4767.97
394.5	4769.94
394.8	4772.02
395.1	4774.16
395.4	4776.36
395.7	4778.58
396	4780.8
396.3	4782.98
396.6	4785.12
396.9	4787.19
397.2	4789.17
397.5	4791.06
397.8	4792.86
398.1	4794.56
398.4	4796.18
398.7	4797.73
399	4799.21
399.3	4800.66
399.6	4802.07
399.9	4803.47
400.2	4804.87
400.5	4806.29
400.8	4807.72
401.1	4809.17
401.4	4810.64
401.7	4812.11
402	4813.58
402.3	4815.04
402.6	4816.46
402.9	4817.83
403.2	4819.14
403.5	4820.36
403.8	4821.5
404.1	4822.55
404.4	4823.51
404.7	4824.38
405	4825.18
405.3	4825.94
405.6	4826.68
405.9	4827.42
406.2	4828.21
406.5	4829.06
406.8	4830.03
407.1	4831.12
407.4	4832.36
407.7	4833.78
408	4835.37
408.3	4837.14
408.6	4839.08
408.9	4841.18
409.2	4843.43
409.5	4845.79
409.8	4848.27
410.1	4850.84
410.4	4853.51
410.7	4856.28
411	4859.19
411.3	4862.28
411.6	4865.63
411.9	4869.32
412.2	4873.48
412.5	4878.25
412.8	4883.79
413.1	4890.26
413.4	4897.85
413.7	4906.74
414	4917.1
414.3	4929.09
414.6	4942.84
414.9	4958.44
415.2	4975.95
415.5	4995.34
415.8	5016.57
416.1	5039.49
416.4	5063.91
416.7	5089.58
417	5116.15
417.3	5143.26
417.6	5170.48
417.9	5197.32
418.2	5223.3
418.5	5247.92
418.8	5270.67
419.1	5291.08
419.4	5308.7
419.7	5323.15
420	5334.11
420.3	5341.32
420.6	5344.64
420.9	5344
421.2	5339.41
421.5	5331.01
421.8	5319
422.1	5303.69
422.4	5285.44
422.7	5264.66
423	5241.84
423.3	5217.48
423.6	5192.09
423.9	5166.2
424.2	5140.29
424.5	5114.83
424.8	5090.26
425.1	5066.91
425.4	5045.12
425.7	5025.13
426	5007.09
426.3	4991.14
426.6	4977.3
426.9	4965.57
427.2	4955.88
427.5	4948.11
427.8	4942.15
428.1	4937.8
428.4	4934.89
428.7	4933.23
429	4932.63
429.3	4932.9
429.6	4933.88
429.9	4935.41
430.2	4937.36
430.5	4939.6
430.8	4942.03
431.1	4944.58
431.4	4947.18
431.7	4949.77
432	4952.31
432.3	4954.76
432.6	4957.09
432.9	4959.29
433.2	4961.3
433.5	4963.12
433.8	4964.71
434.1	4966.05
434.4	4967.11
434.7	4967.87
435	4968.3
435.3	4968.38
435.6	4968.11
435.9	4967.48
436.2	4966.49
436.5	4965.14
436.8	4963.47
437.1	4961.49
437.4	4959.24
437.7	4956.75
438	4954.08
438.3	4951.26
438.6	4948.34
438.9	4945.38
439.2	4942.42
439.5	4939.5
439.8	4936.67
440.1	4933.95
440.4	4931.38
440.7	4928.99
441	4926.79
441.3	4924.8
441.6	4923.04
441.9	4921.52
442.2	4920.23
442.5	4919.21
442.8	4918.43
443.1	4917.93
443.4	4917.7
443.7	4917.74
444	4918.08
444.3	4918.71
444.6	4919.64
444.9	4920.87
445.2	4922.41
445.5	4924.26
445.8	4926.39
446.1	4928.81
446.4	4931.49
446.7	4934.4
447	4937.5
447.3	4940.77
447.6	4944.14
447.9	4947.56
448.2	4950.98
448.5	4954.34
448.8	4957.57
449.1	4960.61
449.4	4963.4
449.7	4965.88
450	4968
450.3	4969.73
450.6	4971.01
450.9	4971.83
451.2	4972.18
451.5	4972.04
451.8	4971.43
452.1	4970.35
452.4	4968.83
452.7	4966.91
453	4964.63
453.3	4962.02
453.6	4959.15
453.9	4956.05
454.2	4952.79
454.5	4949.4
454.8	4945.94
455.1	4942.44
455.4	4938.95
455.7	4935.49
456	4932.09
456.3	4928.77
456.6	4925.55
456.9	4922.42
457.2	4919.39
457.5	4916.47
457.8	4913.64
458.1	4910.92
458.4	4908.29
458.7	4905.76
459	4903.31
459.3	4900.96
459.6	4898.71
459.9	4896.56
460.2	4894.52
460.5	4892.61
460.8	4890.82
461.1	4889.18
461.4	4887.69
461.7	4886.36
462	4885.2
462.3	4884.19
462.6	4883.34
462.9	4882.64
463.2	4882.06
463.5	4881.59
463.8	4881.19
464.1	4880.84
464.4	4880.48
464.7	4880.09
465	4879.62
465.3	4879.03
465.6	4878.28
465.9	4877.33
466.2	4876.15
466.5	4874.72
466.8	4873.02
467.1	4871.04
467.4	4868.78
467.7	4866.25
468	4863.48
468.3	4860.5
468.6	4857.33
468.9	4854.03
469.2	4850.65
469.5	4847.23
469.8	4843.85
470.1	4840.54
470.4	4837.38
470.7	4834.4
471	4831.66
471.3	4829.19
471.6	4827.04
471.9	4825.21
472.2	4823.72
472.5	4822.58
472.8	4821.77
473.1	4821.28
473.4	4821.09
473.7	4821.15
474	4821.43
474.3	4821.87
474.6	4822.43
474.9	4823.04
475.2	4823.66
475.5	4824.23
475.8	4824.69
476.1	4825
476.4	4825.12
476.7	4825.02
477	4824.66
477.3	4824.03
477.6	4823.13
477.9	4821.95
478.2	4820.5
478.5	4818.8
478.8	4816.89
479.1	4814.78
479.4	4812.53
479.7	4810.17
480	4807.75
480.3	4805.31
480.6	4802.9
480.9	4800.55
481.2	4798.3
481.5	4796.17
481.8	4794.2
482.1	4792.4
482.4	4790.76
482.7	4789.3
483	4788
483.3	4786.84
483.6	4785.8
483.9	4784.85
484.2	4783.96
484.5	4783.1
484.8	4782.22
485.1	4781.3
485.4	4780.3
485.7	4779.2
486	4777.96
486.3	4776.57
486.6	4775.03
486.9	4773.33
487.2	4771.47
487.5	4769.47
487.8	4767.34
488.1	4765.11
488.4	4762.8
488.7	4760.46
489	4758.11
489.3	4755.78
489.6	4753.52
489.9	4751.35
490.2	4749.3
490.5	4747.4
490.8	4745.66
491.1	4744.09
491.4	4742.69
491.7	4741.48
492	4740.43
492.3	4739.53
492.6	4738.77
492.9	4738.12
493.2	4737.56
493.5	4737.06
493.8	4736.58
494.1	4736.1
494.4	4735.6
494.7	4735.03
495	4734.39
495.3	4733.64
495.6	4732.78
495.9	4731.77
496.2	4730.62
496.5	4729.31
496.8	4727.84
497.1	4726.2
497.4	4724.39
497.7	4722.41
498	4720.26
498.3	4717.94
498.6	4715.45
498.9	4712.8
499.2	4709.99
499.5	4707.02
499.8	4703.9
500.1	4700.63
500.4	4697.23
500.7	4693.7
501	4690.06
501.3	4686.33
501.6	4682.53
501.9	4678.67
502.2	4674.8
502.5	4670.94
502.8	4667.12
503.1	4663.38
503.4	4659.76
503.7	4656.29
504	4653
504.3	4649.93
504.6	4647.1
504.9	4644.54
505.2	4642.27
505.5	4640.3
505.8	4638.62
506.1	4637.25
506.4	4636.16
506.7	4635.34
507	4634.76
507.3	4634.39
507.6	4634.2
507.9	4634.15
508.2	4634.2
508.5	4634.3
508.8	4634.42
509.1	4634.52
509.4	4634.56
509.7	4634.5
510	4634.34
510.3	4634.03
510.6	4633.59
510.9	4632.98
511.2	4632.23
511.5	4631.32
511.8	4630.28
512.1	4629.11
512.4	4627.83
512.7	4626.47
513	4625.04
513.3	4623.56
513.6	4622.06
513.9	4620.55
514.2	4619.04
514.5	4617.54
514.8	4616.07
515.1	4614.62
515.4	4613.19
515.7	4611.78
516	4610.37
516.3	4608.95
516.6	4607.5
516.9	4606.02
517.2	4604.48
517.5	4602.85
517.8	4601.14
518.1	4599.32
518.4	4597.38
518.7	4595.32
519	4593.13
519.3	4590.82
519.6	4588.4
519.9	4585.88
520.2	4583.27
520.5	4580.61
520.8	4577.92
521.1	4575.24
521.4	4572.59
521.7	4570.02
522	4567.56
522.3	4565.24
522.6	4563.1
522.9	4561.16
523.2	4559.44
523.5	4557.95
523.8	4556.7
524.1	4555.7
524.4	4554.92
524.7	4554.36
525	4553.98
525.3	4553.75
525.6	4553.64
525.9	4553.6
526.2	4553.59
526.5	4553.56
526.8	4553.47
527.1	4553.26
527.4	4552.91
527.7	4552.38
528	4551.65
528.3	4550.69
528.6	4549.49
528.9	4548.06
529.2	4546.4
529.5	4544.53
529.8	4542.46
530.1	4540.23
530.4	4537.87
530.7	4535.4
531	4532.88
531.3	4530.32
531.6	4527.78
531.9	4525.27
532.2	4522.83
532.5	4520.47
532.8	4518.21
533.1	4516.07
533.4	4514.04
533.7	4512.13
534	4510.33
534.3	4508.64
534.6	4507.04
534.9	4505.5
535.2	4504.02
535.5	4502.58
535.8	4501.15
536.1	4499.72
536.4	4498.26
536.7	4496.76
537	4495.21
537.3	4493.58
537.6	4491.88
537.9	4490.08
538.2	4488.19
538.5	4486.21
538.8	4484.13
539.1	4481.96
539.4	4479.71
539.7	4477.39
540	4475.02
540.3	4472.62
540.6	4470.2
540.9	4467.8
541.2	4465.44
541.5	4463.16
541.8	4460.97
542.1	4458.91
542.4	4457.01
542.7	4455.29
543	4453.78
543.3	4452.49
543.6	4451.42
543.9	4450.59
544.2	4449.99
544.5	4449.61
544.8	4449.44
545.1	4449.45
545.4	4449.6
545.7	4449.87
546	4450.21
546.3	4450.58
546.6	4450.95
546.9	4451.26
547.2	4451.48
547.5	4451.57
547.8	4451.49
548.1	4451.23
548.4	4450.76
548.7	4450.08
549	4449.17
549.3	4448.03
549.6	4446.68
549.9	4445.13
550.2	4443.4
550.5	4441.5
550.8	4439.48
551.1	4437.34
551.4	4435.14
551.7	4432.88
552	4430.6
552.3	4428.33
552.6	4426.09
552.9	4423.9
553.2	4421.79
553.5	4419.77
553.8	4417.85
554.1	4416.04
554.4	4414.34
554.7	4412.77
555	4411.31
555.3	4409.97
555.6	4408.73
555.9	4407.58
556.2	4406.51
556.5	4405.5
556.8	4404.53
557.1	4403.57
557.4	4402.61
557.7	4401.62
558	4400.58
558.3	4399.47
558.6	4398.29
558.9	4397.01
559.2	4395.63
559.5	4394.15
559.8	4392.58
560.1	4390.94
560.4	4389.23
560.7	4387.49
561	4385.74
561.3	4384.02
561.6	4382.35
561.9	4380.78
562.2	4379.33
562.5	4378.03
562.8	4376.9
563.1	4375.96
563.4	4375.2
563.7	4374.64
564	4374.27
564.3	4374.05
564.6	4373.98
564.9	4374.01
565.2	4374.12
565.5	4374.26
565.8	4374.4
566.1	4374.5
566.4	4374.52
566.7	4374.45
567	4374.24
567.3	4373.9
567.6	4373.41
567.9	4372.77
568.2	4371.99
568.5	4371.09
568.8	4370.08
569.1	4368.99
569.4	4367.85
569.7	4366.67
570	4365.5
570.3	4364.36
570.6	4363.27
570.9	4362.26
571.2	4361.33
571.5	4360.52
571.8	4359.84
572.1	4359.3
572.4	4358.92
572.7	4358.71
573	4358.68
573.3	4358.86
573.6	4359.25
573.9	4359.88
574.2	4360.77
574.5	4361.93
574.8	4363.36
575.1	4365.08
575.4	4367.09
575.7	4369.38
576	4371.91
576.3	4374.67
576.6	4377.6
576.9	4380.65
577.2	4383.73
577.5	4386.78
577.8	4389.68
578.1	4392.35
578.4	4394.68
578.7	4396.56
579	4397.91
579.3	4398.63
579.6	4398.66
579.9	4397.92
580.2	4396.4
580.5	4394.07
580.8	4390.94
581.1	4387.05
581.4	4382.45
581.7	4377.22
582	4371.45
582.3	4365.24
582.6	4358.71
582.9	4351.99
583.2	4345.18
583.5	4338.4
583.8	4331.76
584.1	4325.34
584.4	4319.22
584.7	4313.45
585	4308.08
585.3	4303.11
585.6	4298.55
585.9	4294.38
586.2	4290.58
586.5	4287.09
586.8	4283.89
587.1	4280.92
587.4	4278.13
587.7	4275.48
588	4272.93
588.3	4270.46
588.6	4268.05
588.9	4265.68
589.2	4263.36
589.5	4261.1
589.8	4258.92
590.1	4256.83
590.4	4254.86
590.7	4253.04
591	4251.38
591.3	4249.92
591.6	4248.65
591.9	4247.58
592.2	4246.72
592.5	4246.06
592.8	4245.56
593.1	4245.22
593.4	4245
593.7	4244.87
594	4244.8
594.3	4244.74
594.6	4244.66
594.9	4244.54
595.2	4244.34
595.5	4244.05
595.8	4243.66
596.1	4243.15
596.4	4242.53
596.7	4241.79
597	4240.96
597.3	4240.05
597.6	4239.07
597.9	4238.05
598.2	4236.99
598.5	4235.93
598.8	4234.88
599.1	4233.84
599.4	4232.83
[truncated: 12,502 more rows]

## Sheet: Site 2-1
Raman shift (cm-1)	count
0	968.479
0.3	987.935
0.6	1006.27
0.9	1023.22
1.2	1038.56
1.5	1052.13
1.8	1063.78
2.1	1073.46
2.4	1081.14
2.7	1086.84
3	1090.64
3.3	1092.66
3.6	1093.06
3.9	1092.03
4.2	1089.78
4.5	1086.55
4.8	1082.61
5.1	1078.19
5.4	1073.57
5.7	1069
6	1064.71
6.3	1060.91
6.6	1057.81
6.9	1055.58
7.2	1054.33
7.5	1054.19
7.8	1055.2
8.1	1057.41
8.4	1060.8
8.7	1065.35
9	1070.97
9.3	1077.57
9.6	1085.02
9.9	1093.19
10.2	1101.9
10.5	1110.98
10.8	1120.24
11.1	1129.51
11.4	1138.58
11.7	1147.29
12	1155.45
12.3	1162.91
12.6	1169.52
12.9	1175.15
13.2	1179.71
13.5	1183.12
13.8	1185.31
14.1	1186.25
14.4	1185.95
14.7	1184.42
15	1181.71
15.3	1177.9
15.6	1173.07
15.9	1167.35
16.2	1160.86
16.5	1153.75
16.8	1146.2
17.1	1138.37
17.4	1130.44
17.7	1122.6
18	1115.03
18.3	1107.9
18.6	1101.37
18.9	1095.61
19.2	1090.74
19.5	1086.88
19.8	1084.13
20.1	1082.54
20.4	1082.15
20.7	1082.96
21	1084.96
21.3	1088.07
21.6	1092.21
21.9	1097.25
22.2	1103.05
22.5	1109.43
22.8	1116.19
23.1	1123.11
23.4	1129.96
23.7	1136.49
24	1142.47
24.3	1147.65
24.6	1151.8
24.9	1154.68
25.2	1156.11
25.5	1155.91
25.8	1153.92
26.1	1150.03
26.4	1144.17
26.7	1136.3
27	1126.44
27.3	1114.63
27.6	1100.97
27.9	1085.61
28.2	1068.72
28.5	1050.55
28.8	1031.33
29.1	1011.36
29.4	990.958
29.7	970.451
30	950.179
30.3	930.488
30.6	911.716
30.9	894.188
31.2	878.206
31.5	864.044
31.8	851.937
32.1	842.079
32.4	834.614
32.7	829.633
33	827.17
33.3	827.203
33.6	829.653
33.9	834.386
34.2	841.215
34.5	849.907
34.8	860.189
35.1	871.756
35.4	884.279
35.7	897.415
36	910.817
36.3	924.144
36.6	937.073
36.9	949.304
37.2	960.575
37.5	970.662
37.8	979.39
38.1	986.638
38.4	992.339
38.7	996.479
39	999.104
39.3	1000.31
39.6	1000.23
39.9	999.051
40.2	996.994
40.5	994.299
40.8	991.225
41.1	988.038
41.4	985.006
41.7	982.382
42	980.406
42.3	979.287
42.6	979.208
42.9	980.31
43.2	982.699
43.5	986.434
43.8	991.534
44.1	997.974
44.4	1005.69
44.7	1014.56
45	1024.47
45.3	1035.22
45.6	1046.62
45.9	1058.45
46.2	1070.46
46.5	1082.39
46.8	1093.99
47.1	1104.98
47.4	1115.1
47.7	1124.08
48	1131.68
48.3	1137.67
48.6	1141.83
48.9	1143.97
49.2	1143.94
49.5	1141.61
49.8	1136.9
50.1	1129.77
50.4	1120.24
50.7	1108.37
51	1094.28
51.3	1078.14
51.6	1060.2
51.9	1040.74
52.2	1020.12
52.5	998.738
52.8	977.041
53.1	955.513
53.4	934.663
53.7	915.017
54	897.103
54.3	881.437
54.6	868.509
54.9	858.764
55.2	852.594
55.5	850.318
55.8	852.174
56.1	858.304
56.4	868.752
56.7	883.457
57	902.25
57.3	924.858
57.6	950.908
57.9	979.938
58.2	1011.41
58.5	1044.72
58.8	1079.21
59.1	1114.22
59.4	1149.06
59.7	1183.06
60	1215.59
60.3	1246.05
60.6	1273.94
60.9	1298.81
61.2	1320.33
61.5	1338.25
61.8	1352.43
62.1	1362.84
62.4	1369.54
62.7	1372.71
63	1372.57
63.3	1369.46
63.6	1363.75
63.9	1355.85
64.2	1346.23
64.5	1335.33
64.8	1323.62
65.1	1311.53
65.4	1299.47
65.7	1287.81
66	1276.87
66.3	1266.92
66.6	1258.17
66.9	1250.77
67.2	1244.84
67.5	1240.44
67.8	1237.56
68.1	1236.19
68.4	1236.27
68.7	1237.73
69	1240.47
69.3	1244.4
69.6	1249.4
69.9	1255.38
70.2	1262.23
70.5	1269.88
70.8	1278.23
71.1	1287.21
71.4	1296.74
71.7	1306.76
72	1317.19
72.3	1327.96
72.6	1338.99
72.9	1350.18
73.2	1361.43
73.5	1372.62
73.8	1383.61
74.1	1394.25
74.4	1404.39
74.7	1413.85
75	1422.47
75.3	1430.07
75.6	1436.49
75.9	1441.58
76.2	1445.2
76.5	1447.24
76.8	1447.65
77.1	1446.37
77.4	1443.41
77.7	1438.82
78	1432.7
78.3	1425.19
78.6	1416.47
78.9	1406.78
79.2	1396.38
79.5	1385.55
79.8	1374.61
80.1	1363.88
80.4	1353.7
80.7	1344.37
81	1336.21
81.3	1329.47
81.6	1324.4
81.9	1321.16
82.2	1319.9
82.5	1320.68
82.8	1323.5
83.1	1328.32
83.4	1335.01
83.7	1343.4
84	1353.25
84.3	1364.29
84.6	1376.21
84.9	1388.68
85.2	1401.35
85.5	1413.87
85.8	1425.91
86.1	1437.18
86.4	1447.39
86.7	1456.33
87	1463.82
87.3	1469.76
87.6	1474.1
87.9	1476.85
88.2	1478.09
88.5	1477.95
88.8	1476.62
89.1	1474.32
89.4	1471.3
89.7	1467.85
90	1464.24
90.3	1460.77
90.6	1457.71
90.9	1455.31
91.2	1453.78
91.5	1453.33
91.8	1454.1
92.1	1456.2
92.4	1459.71
92.7	1464.65
93	1471.04
93.3	1478.84
93.6	1488.01
93.9	1498.5
94.2	1510.23
94.5	1523.16
94.8	1537.22
95.1	1552.36
95.4	1568.57
95.7	1585.81
96	1604.1
96.3	1623.44
96.6	1643.86
96.9	1665.38
97.2	1688.04
97.5	1711.86
97.8	1736.85
98.1	1763.01
98.4	1790.3
98.7	1818.69
99	1848.09
99.3	1878.42
99.6	1909.55
99.9	1941.35
100.2	1973.67
100.5	2006.37
100.8	2039.29
101.1	2072.31
101.4	2105.32
101.7	2138.24
102	2171.03
102.3	2203.7
102.6	2236.31
102.9	2268.99
103.2	2301.9
103.5	2335.27
103.8	2369.39
104.1	2404.59
104.4	2441.24
104.7	2479.76
105	2520.59
105.3	2564.17
105.6	2610.97
105.9	2661.46
106.2	2716.09
106.5	2775.29
106.8	2839.5
107.1	2909.1
107.4	2984.45
107.7	3065.88
108	3153.68
108.3	3248.12
108.6	3349.43
108.9	3457.78
109.2	3573.36
109.5	3696.27
109.8	3826.63
110.1	3964.49
110.4	4109.87
110.7	4262.78
111	4423.15
111.3	4590.91
111.6	4765.92
111.9	4947.98
112.2	5136.86
112.5	5332.25
112.8	5533.78
113.1	5741.04
113.4	5953.51
113.7	6170.63
114	6391.79
114.3	6616.29
114.6	6843.39
114.9	7072.28
115.2	7302.12
115.5	7532.04
115.8	7761.14
116.1	7988.5
116.4	8213.19
116.7	8434.29
117	8650.92
117.3	8862.18
117.6	9067.25
117.9	9265.34
118.2	9455.71
118.5	9637.68
118.8	9810.65
119.1	9974.07
119.4	10127.5
119.7	10270.5
120	10402.8
120.3	10524.2
120.6	10634.5
120.9	10733.7
121.2	10821.7
121.5	10898.7
121.8	10964.7
122.1	11020
122.4	11064.8
122.7	11099.5
123	11124.5
123.3	11140
123.6	11146.6
123.9	11144.8
124.2	11135
124.5	11117.7
124.8	11093.4
125.1	11062.6
125.4	11025.8
125.7	10983.6
126	10936.3
126.3	10884.5
126.6	10828.6
126.9	10769
127.2	10706
127.5	10640.1
127.8	10571.7
128.1	10501
128.4	10428.4
128.7	10354.2
129	10278.8
129.3	10202.3
129.6	10125.1
129.9	10047.5
130.2	9969.69
130.5	9892.03
130.8	9814.77
131.1	9738.17
131.4	9662.48
131.7	9587.96
132	9514.84
132.3	9443.34
132.6	9373.67
132.9	9306
133.2	9240.5
133.5	9177.3
133.8	9116.51
134.1	9058.21
134.4	9002.46
134.7	8949.28
135	8898.68
135.3	8850.65
135.6	8805.15
135.9	8762.14
136.2	8721.55
136.5	8683.32
136.8	8647.38
137.1	8613.65
137.4	8582.07
137.7	8552.56
138	8525.07
138.3	8499.52
138.6	8475.86
138.9	8454.05
139.2	8434.02
139.5	8415.74
139.8	8399.15
140.1	8384.19
140.4	8370.8
140.7	8358.92
141	8348.46
141.3	8339.33
141.6	8331.43
141.9	8324.66
142.2	8318.88
142.5	8313.96
142.8	8309.76
143.1	8306.15
143.4	8302.97
143.7	8300.08
144	8297.34
144.3	8294.62
144.6	8291.8
144.9	8288.78
145.2	8285.46
145.5	8281.78
145.8	8277.69
146.1	8273.16
146.4	8268.17
146.7	8262.75
147	8256.92
147.3	8250.72
147.6	8244.23
147.9	8237.52
148.2	8230.66
148.5	8223.75
148.8	8216.88
149.1	8210.15
149.4	8203.64
149.7	8197.45
150	8191.64
150.3	8186.29
150.6	8181.46
150.9	8177.19
151.2	8173.52
151.5	8170.47
151.8	8168.05
152.1	8166.28
152.4	8165.14
152.7	8164.61
153	8164.68
153.3	8165.32
153.6	8166.5
153.9	8168.2
154.2	8170.39
154.5	8173.05
154.8	8176.16
155.1	8179.7
155.4	8183.68
155.7	8188.08
156	8192.93
156.3	8198.24
156.6	8204.03
156.9	8210.33
157.2	8217.17
157.5	8224.6
157.8	8232.65
158.1	8241.36
158.4	8250.77
158.7	8260.92
159	8271.82
159.3	8283.5
159.6	8295.97
159.9	8309.21
160.2	8323.22
160.5	8337.95
160.8	8353.37
161.1	8369.39
161.4	8385.94
161.7	8402.92
162	8420.22
162.3	8437.71
162.6	8455.25
162.9	8472.68
163.2	8489.85
163.5	8506.58
163.8	8522.71
164.1	8538.06
164.4	8552.47
164.7	8565.75
165	8577.76
165.3	8588.33
165.6	8597.33
165.9	8604.62
166.2	8610.09
166.5	8613.64
166.8	8615.2
167.1	8614.69
167.4	8612.08
167.7	8607.34
168	8600.47
168.3	8591.49
168.6	8580.43
168.9	8567.33
169.2	8552.29
169.5	8535.37
169.8	8516.67
170.1	8496.33
170.4	8474.45
170.7	8451.17
171	8426.65
171.3	8401.02
171.6	8374.45
171.9	8347.08
172.2	8319.09
172.5	8290.62
172.8	8261.82
173.1	8232.84
173.4	8203.83
173.7	8174.91
174	8146.2
174.3	8117.82
174.6	8089.86
174.9	8062.4
175.2	8035.51
175.5	8009.26
175.8	7983.68
176.1	7958.8
176.4	7934.64
176.7	7911.2
177	7888.48
177.3	7866.46
177.6	7845.12
177.9	7824.42
178.2	7804.34
178.5	7784.84
178.8	7765.87
179.1	7747.4
179.4	7729.38
179.7	7711.79
180	7694.59
180.3	7677.76
180.6	7661.25
180.9	7645.06
181.2	7629.16
181.5	7613.53
181.8	7598.16
182.1	7583.03
182.4	7568.14
182.7	7553.46
183	7538.97
183.3	7524.66
183.6	7510.51
183.9	7496.49
184.2	7482.56
184.5	7468.7
184.8	7454.88
185.1	7441.05
185.4	7427.17
185.7	7413.21
186	7399.13
186.3	7384.89
186.6	7370.46
186.9	7355.82
187.2	7340.93
187.5	7325.79
187.8	7310.39
188.1	7294.72
188.4	7278.79
188.7	7262.6
189	7246.19
189.3	7229.55
189.6	7212.74
189.9	7195.76
190.2	7178.65
190.5	7161.44
190.8	7144.16
191.1	7126.83
191.4	7109.47
191.7	7092.09
192	7074.71
192.3	7057.32
192.6	7039.93
192.9	7022.52
193.2	7005.09
193.5	6987.6
193.8	6970.04
194.1	6952.38
194.4	6934.6
194.7	6916.68
195	6898.57
195.3	6880.28
195.6	6861.77
195.9	6843.05
196.2	6824.09
196.5	6804.9
196.8	6785.49
197.1	6765.87
197.4	6746.06
197.7	6726.08
198	6705.97
198.3	6685.75
198.6	6665.46
198.9	6645.14
199.2	6624.83
199.5	6604.56
199.8	6584.38
200.1	6564.31
200.4	6544.38
200.7	6524.63
201	6505.07
201.3	6485.71
201.6	6466.57
201.9	6447.66
202.2	6428.96
202.5	6410.48
202.8	6392.21
203.1	6374.12
203.4	6356.22
203.7	6338.47
204	6320.85
204.3	6303.35
204.6	6285.93
204.9	6268.58
205.2	6251.28
205.5	6234.01
205.8	6216.74
206.1	6199.46
206.4	6182.16
206.7	6164.83
207	6147.45
207.3	6130.03
207.6	6112.56
207.9	6095.04
208.2	6077.46
208.5	6059.84
208.8	6042.17
209.1	6024.46
209.4	6006.7
209.7	5988.92
210	5971.1
210.3	5953.26
210.6	5935.4
210.9	5917.51
211.2	5899.61
211.5	5881.69
211.8	5863.75
212.1	5845.79
212.4	5827.81
212.7	5809.8
213	5791.77
213.3	5773.69
213.6	5755.58
213.9	5737.43
214.2	5719.23
214.5	5700.97
214.8	5682.66
215.1	5664.3
215.4	5645.88
215.7	5627.4
216	5608.88
216.3	5590.3
216.6	5571.68
216.9	5553.02
217.2	5534.34
217.5	5515.65
217.8	5496.95
218.1	5478.27
218.4	5459.62
218.7	5441.02
219	5422.48
219.3	5404.01
219.6	5385.64
219.9	5367.38
220.2	5349.24
220.5	5331.24
220.8	5313.37
221.1	5295.65
221.4	5278.07
221.7	5260.65
222	5243.36
222.3	5226.21
222.6	5209.18
222.9	5192.25
223.2	5175.42
223.5	5158.67
223.8	5141.96
224.1	5125.3
224.4	5108.65
224.7	5092.01
225	5075.35
225.3	5058.67
225.6	5041.96
225.9	5025.22
226.2	5008.45
226.5	4991.66
226.8	4974.86
227.1	4958.08
227.4	4941.33
227.7	4924.65
228	4908.06
228.3	4891.61
228.6	4875.32
228.9	4859.23
229.2	4843.37
229.5	4827.77
229.8	4812.46
230.1	4797.46
230.4	4782.78
230.7	4768.43
231	4754.4
231.3	4740.69
231.6	4727.27
231.9	4714.11
232.2	4701.19
232.5	4688.46
232.8	4675.87
233.1	4663.36
233.4	4650.89
233.7	4638.4
234	4625.82
234.3	4613.12
234.6	4600.24
234.9	4587.13
235.2	4573.77
235.5	4560.13
235.8	4546.2
236.1	4531.96
236.4	4517.43
236.7	4502.62
237	4487.55
237.3	4472.27
237.6	4456.82
237.9	4441.25
238.2	4425.62
238.5	4409.97
238.8	4394.38
239.1	4378.9
239.4	4363.59
239.7	4348.5
240	4333.68
240.3	4319.16
240.6	4304.97
240.9	4291.13
241.2	4277.66
241.5	4264.55
241.8	4251.8
242.1	4239.39
242.4	4227.28
242.7	4215.46
243	4203.88
243.3	4192.5
243.6	4181.29
243.9	4170.19
244.2	4159.17
244.5	4148.18
244.8	4137.19
245.1	4126.17
245.4	4115.09
245.7	4103.93
246	4092.67
246.3	4081.3
246.6	4069.82
246.9	4058.22
247.2	4046.51
247.5	4034.7
247.8	4022.8
248.1	4010.8
248.4	3998.74
248.7	3986.61
249	3974.43
249.3	3962.21
249.6	3949.96
249.9	3937.68
250.2	3925.4
250.5	3913.11
250.8	3900.82
251.1	3888.54
251.4	3876.27
251.7	3864.03
252	3851.82
252.3	3839.65
252.6	3827.54
252.9	3815.5
253.2	3803.54
253.5	3791.69
253.8	3779.94
254.1	3768.34
254.4	3756.88
254.7	3745.58
255	3734.46
255.3	3723.53
255.6	3712.79
255.9	3702.24
256.2	3691.89
256.5	3681.72
256.8	3671.74
257.1	3661.92
257.4	3652.24
257.7	3642.69
258	3633.23
258.3	3623.85
258.6	3614.52
258.9	3605.21
259.2	3595.88
259.5	3586.53
259.8	3577.12
260.1	3567.63
260.4	3558.05
260.7	3548.38
261	3538.59
261.3	3528.69
261.6	3518.69
261.9	3508.58
262.2	3498.37
262.5	3488.08
262.8	3477.72
263.1	3467.3
263.4	3456.84
263.7	3446.34
264	3435.83
264.3	3425.31
264.6	3414.79
264.9	3404.28
265.2	3393.78
265.5	3383.28
265.8	3372.79
266.1	3362.3
266.4	3351.8
266.7	3341.28
267	3330.74
267.3	3320.17
267.6	3309.56
267.9	3298.91
268.2	3288.22
268.5	3277.49
268.8	3266.72
269.1	3255.94
269.4	3245.14
269.7	3234.36
270	3223.62
270.3	3212.94
270.6	3202.35
270.9	3191.89
271.2	3181.59
271.5	3171.47
271.8	3161.57
272.1	3151.92
272.4	3142.53
272.7	3133.42
273	3124.61
273.3	3116.09
273.6	3107.86
273.9	3099.91
274.2	3092.22
274.5	3084.75
274.8	3077.49
275.1	3070.37
275.4	3063.37
275.7	3056.42
276	3049.48
276.3	3042.5
276.6	3035.43
276.9	3028.22
277.2	3020.84
277.5	3013.24
277.8	3005.4
278.1	2997.3
278.4	2988.93
278.7	2980.29
279	2971.39
279.3	2962.25
279.6	2952.9
279.9	2943.36
280.2	2933.68
280.5	2923.91
280.8	2914.08
281.1	2904.25
281.4	2894.47
281.7	2884.78
282	2875.23
282.3	2865.84
282.6	2856.66
282.9	2847.71
283.2	2839.01
283.5	2830.56
283.8	2822.38
284.1	2814.45
284.4	2806.76
284.7	2799.3
285	2792.06
285.3	2785
285.6	2778.09
285.9	2771.33
286.2	2764.66
286.5	2758.08
286.8	2751.56
287.1	2745.07
287.4	2738.6
287.7	2732.13
288	2725.67
288.3	2719.19
288.6	2712.7
288.9	2706.2
289.2	2699.69
289.5	2693.18
289.8	2686.67
290.1	2680.19
290.4	2673.72
290.7	2667.29
291	2660.9
291.3	2654.57
291.6	2648.29
291.9	2642.07
292.2	2635.91
292.5	2629.83
292.8	2623.81
293.1	2617.86
293.4	2611.98
293.7	2606.16
294	2600.4
294.3	2594.7
294.6	2589.05
294.9	2583.45
295.2	2577.9
295.5	2572.4
295.8	2566.94
296.1	2561.52
296.4	2556.15
296.7	2550.82
297	2545.54
297.3	2540.31
297.6	2535.12
297.9	2530
298.2	2524.93
298.5	2519.92
298.8	2514.98
299.1	2510.1
299.4	2505.29
299.7	2500.55
300	2495.88
300.3	2491.28
300.6	2486.75
300.9	2482.28
301.2	2477.88
301.5	2473.53
301.8	2469.23
302.1	2464.97
302.4	2460.74
302.7	2456.55
303	2452.37
303.3	2448.19
303.6	2444.02
303.9	2439.83
304.2	2435.63
304.5	2431.4
304.8	2427.14
305.1	2422.85
305.4	2418.51
305.7	2414.13
306	2409.71
306.3	2405.24
306.6	2400.73
306.9	2396.19
307.2	2391.61
307.5	2387.01
307.8	2382.39
308.1	2377.77
308.4	2373.14
308.7	2368.53
309	2363.94
309.3	2359.38
309.6	2354.88
309.9	2350.43
310.2	2346.07
310.5	2341.8
310.8	2337.65
311.1	2333.61
311.4	2329.73
311.7	2326.01
312	2322.46
312.3	2319.11
312.6	2315.97
312.9	2313.05
313.2	2310.37
313.5	2307.93
313.8	2305.74
314.1	2303.8
314.4	2302.1
314.7	2300.65
315	2299.42
315.3	2298.4
315.6	2297.57
315.9	2296.9
316.2	2296.36
316.5	2295.93
316.8	2295.55
317.1	2295.21
317.4	2294.86
317.7	2294.47
318	2294
318.3	2293.43
318.6	2292.73
318.9	2291.88
319.2	2290.87
319.5	2289.69
319.8	2288.33
320.1	2286.81
320.4	2285.14
320.7	2283.32
321	2281.39
321.3	2279.37
321.6	2277.28
321.9	2275.15
322.2	2273.02
322.5	2270.91
322.8	2268.84
323.1	2266.84
323.4	2264.92
323.7	2263.1
324	2261.39
324.3	2259.78
324.6	2258.28
324.9	2256.88
325.2	2255.57
325.5	2254.32
325.8	2253.13
326.1	2251.98
326.4	2250.84
326.7	2249.7
327	2248.54
327.3	2247.34
327.6	2246.09
327.9	2244.78
328.2	2243.4
328.5	2241.95
328.8	2240.42
329.1	2238.83
329.4	2237.18
329.7	2235.48
330	2233.74
330.3	2231.97
330.6	2230.2
330.9	2228.43
331.2	2226.68
331.5	2224.96
331.8	2223.29
332.1	2221.67
332.4	2220.12
332.7	2218.65
333	2217.25
333.3	2215.94
333.6	2214.7
333.9	2213.55
334.2	2212.47
334.5	2211.46
334.8	2210.53
335.1	2209.65
335.4	2208.83
335.7	2208.06
336	2207.34
336.3	2206.66
336.6	2206.02
336.9	2205.42
337.2	2204.86
337.5	2204.33
337.8	2203.85
338.1	2203.41
338.4	2203.02
338.7	2202.67
339	2202.37
339.3	2202.13
339.6	2201.94
339.9	2201.8
340.2	2201.72
340.5	2201.67
340.8	2201.66
341.1	2201.68
341.4	2201.72
341.7	2201.75
342	2201.78
342.3	2201.77
342.6	2201.73
342.9	2201.62
343.2	2201.44
343.5	2201.17
343.8	2200.8
344.1	2200.33
344.4	2199.74
344.7	2199.05
345	2198.26
345.3	2197.37
345.6	2196.39
345.9	2195.35
346.2	2194.26
346.5	2193.14
346.8	2192.02
347.1	2190.93
347.4	2189.87
347.7	2188.89
348	2188
348.3	2187.22
348.6	2186.57
348.9	2186.05
349.2	2185.69
349.5	2185.48
349.8	2185.43
350.1	2185.53
350.4	2185.78
350.7	2186.16
351	2186.68
351.3	2187.31
351.6	2188.04
351.9	2188.86
352.2	2189.76
352.5	2190.71
352.8	2191.72
353.1	2192.76
353.4	2193.84
353.7	2194.93
354	2196.03
354.3	2197.15
354.6	2198.26
354.9	2199.38
355.2	2200.5
355.5	2201.62
355.8	2202.74
356.1	2203.86
356.4	2204.98
356.7	2206.1
357	2207.22
357.3	2208.35
357.6	2209.49
357.9	2210.63
358.2	2211.78
358.5	2212.95
358.8	2214.13
359.1	2215.32
359.4	2216.53
359.7	2217.75
360	2218.97
360.3	2220.19
360.6	2221.4
360.9	2222.59
361.2	2223.75
361.5	2224.86
361.8	2225.91
362.1	2226.88
362.4	2227.74
362.7	2228.49
363	2229.09
363.3	2229.54
363.6	2229.82
363.9	2229.92
364.2	2229.84
364.5	2229.58
364.8	2229.13
365.1	2228.52
365.4	2227.76
365.7	2226.87
366	2225.89
366.3	2224.83
366.6	2223.75
366.9	2222.68
367.2	2221.65
367.5	2220.7
367.8	2219.86
368.1	2219.17
368.4	2218.66
368.7	2218.33
369	2218.21
369.3	2218.3
369.6	2218.6
369.9	2219.11
370.2	2219.8
370.5	2220.66
370.8	2221.68
371.1	2222.82
371.4	2224.05
371.7	2225.36
372	2226.71
372.3	2228.08
372.6	2229.45
372.9	2230.8
373.2	2232.13
373.5	2233.41
373.8	2234.64
374.1	2235.82
374.4	2236.96
374.7	2238.04
375	2239.08
375.3	2240.07
375.6	2241.03
375.9	2241.95
376.2	2242.84
376.5	2243.69
376.8	2244.5
377.1	2245.27
377.4	2245.99
377.7	2246.66
378	2247.28
378.3	2247.83
378.6	2248.31
378.9	2248.73
379.2	2249.09
379.5	2249.38
379.8	2249.63
380.1	2249.83
380.4	2250
380.7	2250.16
381	2250.33
381.3	2250.52
381.6	2250.75
381.9	2251.04
382.2	2251.39
382.5	2251.83
382.8	2252.36
383.1	2252.97
383.4	2253.67
383.7	2254.46
384	2255.32
384.3	2256.23
384.6	2257.18
384.9	2258.15
385.2	2259.12
385.5	2260.06
385.8	2260.97
386.1	2261.82
386.4	2262.6
386.7	2263.3
387	2263.93
387.3	2264.49
387.6	2264.98
387.9	2265.43
388.2	2265.86
388.5	2266.29
388.8	2266.74
389.1	2267.26
389.4	2267.86
389.7	2268.59
390	2269.47
390.3	2270.51
390.6	2271.75
390.9	2273.19
391.2	2274.84
391.5	2276.7
391.8	2278.76
392.1	2280.99
392.4	2283.38
392.7	2285.9
393	2288.5
393.3	2291.15
393.6	2293.8
393.9	2296.41
394.2	2298.94
394.5	2301.34
394.8	2303.58
395.1	2305.62
395.4	2307.44
395.7	2309.02
396	2310.34
396.3	2311.41
396.6	2312.24
396.9	2312.83
397.2	2313.21
397.5	2313.41
397.8	2313.47
398.1	2313.43
398.4	2313.31
398.7	2313.18
399	2313.07
399.3	2313.01
399.6	2313.05
399.9	2313.21
400.2	2313.5
400.5	2313.96
400.8	2314.57
401.1	2315.34
401.4	2316.25
401.7	2317.3
402	2318.45
402.3	2319.67
402.6	2320.94
402.9	2322.21
403.2	2323.46
403.5	2324.65
403.8	2325.74
404.1	2326.72
404.4	2327.56
404.7	2328.24
405	2328.76
405.3	2329.12
405.6	2329.33
405.9	2329.4
406.2	2329.34
406.5	2329.19
406.8	2328.97
407.1	2328.72
407.4	2328.47
407.7	2328.26
408	2328.13
408.3	2328.11
408.6	2328.24
408.9	2328.56
409.2	2329.11
409.5	2329.9
409.8	2330.98
410.1	2332.39
410.4	2334.14
410.7	2336.27
411	2338.81
411.3	2341.79
411.6	2345.23
411.9	2349.17
412.2	2353.62
412.5	2358.61
412.8	2364.15
413.1	2370.25
413.4	2376.9
413.7	2384.09
414	2391.81
414.3	2400.02
414.6	2408.67
414.9	2417.69
415.2	2427.01
415.5	2436.53
415.8	2446.15
416.1	2455.74
416.4	2465.18
416.7	2474.33
417	2483.06
417.3	2491.21
417.6	2498.66
417.9	2505.28
418.2	2510.93
418.5	2515.53
418.8	2518.99
419.1	2521.24
419.4	2522.24
419.7	2521.98
420	2520.47
420.3	2517.74
420.6	2513.87
420.9	2508.94
421.2	2503.05
421.5	2496.35
421.8	2488.96
422.1	2481.05
422.4	2472.78
422.7	2464.31
423	2455.8
423.3	2447.41
423.6	2439.29
423.9	2431.56
424.2	2424.35
424.5	2417.74
424.8	2411.82
425.1	2406.62
425.4	2402.19
425.7	2398.54
426	2395.64
426.3	2393.48
426.6	2392
426.9	2391.14
427.2	2390.83
427.5	2390.99
427.8	2391.53
428.1	2392.36
428.4	2393.41
428.7	2394.58
429	2395.8
429.3	2397
429.6	2398.11
429.9	2399.1
430.2	2399.93
430.5	2400.56
430.8	2400.98
431.1	2401.2
431.4	2401.2
431.7	2401.01
432	2400.65
432.3	2400.14
432.6	2399.51
432.9	2398.8
433.2	2398.04
433.5	2397.26
433.8	2396.49
434.1	2395.76
434.4	2395.1
434.7	2394.53
435	2394.07
435.3	2393.73
435.6	2393.51
435.9	2393.43
436.2	2393.48
436.5	2393.66
436.8	2393.97
437.1	2394.4
437.4	2394.93
437.7	2395.56
438	2396.28
438.3	2397.06
438.6	2397.91
438.9	2398.8
439.2	2399.73
439.5	2400.68
439.8	2401.64
440.1	2402.6
440.4	2403.55
440.7	2404.48
441	2405.38
441.3	2406.24
441.6	2407.06
441.9	2407.83
442.2	2408.55
442.5	2409.22
442.8	2409.84
443.1	2410.41
443.4	2410.94
443.7	2411.42
444	2411.88
444.3	2412.31
444.6	2412.74
444.9	2413.18
445.2	2413.63
445.5	2414.12
445.8	2414.65
446.1	2415.24
446.4	2415.9
446.7	2416.62
447	2417.42
447.3	2418.28
447.6	2419.21
447.9	2420.19
448.2	2421.19
448.5	2422.2
448.8	2423.2
449.1	2424.15
449.4	2425.01
449.7	2425.77
450	2426.37
450.3	2426.8
450.6	2427.02
450.9	2427.01
451.2	2426.75
451.5	2426.24
451.8	2425.46
452.1	2424.42
452.4	2423.14
452.7	2421.65
453	2419.96
453.3	2418.12
453.6	2416.17
453.9	2414.16
454.2	2412.13
454.5	2410.14
454.8	2408.22
455.1	2406.44
455.4	2404.81
455.7	2403.39
456	2402.17
456.3	2401.19
456.6	2400.45
456.9	2399.94
457.2	2399.65
457.5	2399.55
457.8	2399.62
458.1	2399.82
458.4	2400.12
458.7	2400.48
459	2400.86
459.3	2401.21
459.6	2401.52
459.9	2401.74
460.2	2401.85
460.5	2401.85
460.8	2401.72
461.1	2401.47
461.4	2401.09
461.7	2400.61
462	2400.04
462.3	2399.4
462.6	2398.73
462.9	2398.05
463.2	2397.38
463.5	2396.75
463.8	2396.19
464.1	2395.71
464.4	2395.33
464.7	2395.06
465	2394.91
465.3	2394.86
465.6	2394.92
465.9	2395.07
466.2	2395.3
466.5	2395.58
466.8	2395.9
467.1	2396.23
467.4	2396.55
467.7	2396.84
468	2397.08
468.3	2397.24
468.6	2397.31
468.9	2397.28
469.2	2397.15
469.5	2396.89
469.8	2396.52
470.1	2396.03
470.4	2395.43
470.7	2394.74
471	2393.95
471.3	2393.09
471.6	2392.16
471.9	2391.19
472.2	2390.18
472.5	2389.16
472.8	2388.14
473.1	2387.12
473.4	2386.12
473.7	2385.15
474	2384.21
474.3	2383.3
474.6	2382.43
474.9	2381.6
475.2	2380.79
475.5	2380.01
475.8	2379.24
476.1	2378.48
476.4	2377.73
476.7	2376.97
477	2376.2
477.3	2375.41
477.6	2374.6
477.9	2373.78
478.2	2372.93
478.5	2372.08
478.8	2371.22
479.1	2370.36
479.4	2369.52
479.7	2368.7
480	2367.92
480.3	2367.2
480.6	2366.54
480.9	2365.95
481.2	2365.44
481.5	2365.03
481.8	2364.7
482.1	2364.47
482.4	2364.32
482.7	2364.25
483	2364.24
483.3	2364.29
483.6	2364.38
483.9	2364.49
484.2	2364.61
484.5	2364.71
484.8	2364.78
485.1	2364.8
485.4	2364.76
485.7	2364.65
486	2364.47
486.3	2364.19
486.6	2363.83
486.9	2363.39
487.2	2362.87
487.5	2362.27
487.8	2361.62
488.1	2360.91
488.4	2360.17
488.7	2359.4
489	2358.62
489.3	2357.85
489.6	2357.09
489.9	2356.37
490.2	2355.68
490.5	2355.05
490.8	2354.47
491.1	2353.96
491.4	2353.51
491.7	2353.13
492	2352.83
492.3	2352.59
492.6	2352.42
492.9	2352.3
493.2	2352.25
493.5	2352.23
493.8	2352.25
494.1	2352.29
494.4	2352.34
494.7	2352.39
495	2352.43
495.3	2352.43
495.6	2352.39
495.9	2352.29
496.2	2352.13
496.5	2351.9
496.8	2351.58
497.1	2351.18
497.4	2350.7
497.7	2350.14
498	2349.5
498.3	2348.8
498.6	2348.04
498.9	2347.25
499.2	2346.43
499.5	2345.61
499.8	2344.79
500.1	2344
500.4	2343.25
500.7	2342.55
501	2341.91
501.3	2341.33
501.6	2340.82
501.9	2340.36
502.2	2339.96
502.5	2339.6
502.8	2339.27
503.1	2338.94
503.4	2338.61
503.7	2338.24
504	2337.81
504.3	2337.32
504.6	2336.73
504.9	2336.03
505.2	2335.21
505.5	2334.26
505.8	2333.18
506.1	2331.96
506.4	2330.61
506.7	2329.15
507	2327.57
507.3	2325.91
507.6	2324.17
507.9	2322.37
508.2	2320.55
508.5	2318.71
508.8	2316.89
509.1	2315.1
509.4	2313.37
509.7	2311.71
510	2310.14
510.3	2308.66
510.6	2307.3
510.9	2306.07
511.2	2304.96
511.5	2303.99
511.8	2303.15
512.1	2302.46
512.4	2301.9
512.7	2301.47
513	2301.18
513.3	2301.02
513.6	2300.98
513.9	2301.05
514.2	2301.23
514.5	2301.51
514.8	2301.88
515.1	2302.32
515.4	2302.82
515.7	2303.37
516	2303.95
516.3	2304.54
516.6	2305.12
516.9	2305.69
517.2	2306.21
517.5	2306.67
517.8	2307.05
518.1	2307.34
518.4	2307.53
518.7	2307.6
519	2307.55
519.3	2307.36
519.6	2307.05
519.9	2306.6
520.2	2306.02
520.5	2305.33
520.8	2304.53
521.1	2303.63
521.4	2302.66
521.7	2301.64
522	2300.58
522.3	2299.5
522.6	2298.42
522.9	2297.36
523.2	2296.34
523.5	2295.38
523.8	2294.47
524.1	2293.65
524.4	2292.89
524.7	2292.22
525	2291.61
525.3	2291.07
525.6	2290.59
525.9	2290.15
526.2	2289.73
526.5	2289.32
526.8	2288.9
527.1	2288.45
527.4	2287.95
527.7	2287.4
528	2286.77
528.3	2286.05
528.6	2285.25
528.9	2284.36
529.2	2283.39
529.5	2282.33
529.8	2281.21
530.1	2280.04
530.4	2278.83
530.7	2277.61
531	2276.41
531.3	2275.24
531.6	2274.12
531.9	2273.08
532.2	2272.15
532.5	2271.33
532.8	2270.64
533.1	2270.09
533.4	2269.69
533.7	2269.44
534	2269.34
534.3	2269.39
534.6	2269.57
534.9	2269.87
535.2	2270.27
535.5	2270.76
535.8	2271.33
536.1	2271.95
536.4	2272.59
536.7	2273.25
537	2273.91
537.3	2274.54
537.6	2275.13
537.9	2275.67
538.2	2276.15
538.5	2276.55
538.8	2276.87
539.1	2277.1
539.4	2277.22
539.7	2277.25
540	2277.17
540.3	2276.97
540.6	2276.67
540.9	2276.25
541.2	2275.72
541.5	2275.07
541.8	2274.32
542.1	2273.44
542.4	2272.47
542.7	2271.38
543	2270.2
543.3	2268.93
543.6	2267.58
543.9	2266.15
544.2	2264.66
544.5	2263.12
544.8	2261.55
545.1	2259.96
545.4	2258.37
545.7	2256.79
546	2255.24
546.3	2253.73
546.6	2252.27
546.9	2250.89
547.2	2249.6
547.5	2248.4
547.8	2247.3
548.1	2246.3
548.4	2245.43
548.7	2244.66
549	2244.02
549.3	2243.48
549.6	2243.05
549.9	2242.72
550.2	2242.48
550.5	2242.33
550.8	2242.25
551.1	2242.23
551.4	2242.26
551.7	2242.33
552	2242.42
552.3	2242.53
552.6	2242.64
552.9	2242.75
553.2	2242.85
553.5	2242.92
553.8	2242.97
554.1	2242.99
554.4	2242.97
554.7	2242.91
555	2242.81
555.3	2242.67
555.6	2242.49
555.9	2242.26
556.2	2241.99
556.5	2241.68
556.8	2241.33
557.1	2240.93
557.4	2240.49
557.7	2240.01
558	2239.49
558.3	2238.94
558.6	2238.34
558.9	2237.71
559.2	2237.04
559.5	2236.34
559.8	2235.6
560.1	2234.85
560.4	2234.07
560.7	2233.28
561	2232.47
561.3	2231.66
561.6	2230.86
561.9	2230.07
562.2	2229.29
562.5	2228.53
562.8	2227.8
563.1	2227.1
563.4	2226.44
563.7	2225.82
564	2225.23
564.3	2224.67
564.6	2224.15
564.9	2223.65
565.2	2223.17
565.5	2222.71
565.8	2222.25
566.1	2221.79
566.4	2221.32
566.7	2220.82
567	2220.3
567.3	2219.75
567.6	2219.17
567.9	2218.54
568.2	2217.88
568.5	2217.19
568.8	2216.47
569.1	2215.73
569.4	2214.98
569.7	2214.23
570	2213.51
570.3	2212.83
570.6	2212.2
570.9	2211.65
571.2	2211.2
571.5	2210.86
571.8	2210.65
572.1	2210.58
572.4	2210.67
572.7	2210.92
573	2211.33
573.3	2211.91
573.6	2212.64
573.9	2213.52
574.2	2214.52
574.5	2215.62
574.8	2216.79
575.1	2218
575.4	2219.21
575.7	2220.39
576	2221.49
576.3	2222.47
576.6	2223.3
576.9	2223.94
577.2	2224.35
577.5	2224.51
577.8	2224.4
578.1	2224.02
578.4	2223.35
578.7	2222.4
579	2221.18
579.3	2219.73
579.6	2218.06
579.9	2216.22
580.2	2214.24
580.5	2212.19
580.8	2210.09
581.1	2208
581.4	2205.97
581.7	2204.04
582	2202.24
582.3	2200.61
582.6	2199.16
582.9	2197.9
583.2	2196.84
583.5	2195.98
583.8	2195.28
584.1	2194.73
584.4	2194.3
584.7	2193.94
585	2193.63
585.3	2193.31
585.6	2192.95
585.9	2192.5
586.2	2191.95
586.5	2191.25
586.8	2190.38
587.1	2189.34
587.4	2188.13
587.7	2186.73
588	2185.17
588.3	2183.47
588.6	2181.64
588.9	2179.71
589.2	2177.72
589.5	2175.69
589.8	2173.66
590.1	2171.65
590.4	2169.68
590.7	2167.77
591	2165.95
591.3	2164.2
591.6	2162.54
591.9	2160.96
592.2	2159.46
592.5	2158.01
592.8	2156.62
593.1	2155.25
593.4	2153.91
593.7	2152.56
594	2151.22
594.3	2149.86
594.6	2148.49
594.9	2147.11
595.2	2145.73
595.5	2144.36
595.8	2143.02
596.1	2141.74
596.4	2140.52
596.7	2139.41
597	2138.41
597.3	2137.56
597.6	2136.86
597.9	2136.34
598.2	2136
598.5	2135.83
598.8	2135.85
599.1	2136.04
599.4	2136.39
[truncated: 12,502 more rows]

## Sheet: Site 2-2
Raman shift (cm-1)	count
0	1067.82
0.3	1074.53
0.6	1081.24
0.9	1087.79
1.2	1093.99
1.5	1099.63
1.8	1104.51
2.1	1108.43
2.4	1111.19
2.7	1112.64
3	1112.64
3.3	1111.08
3.6	1107.93
3.9	1103.18
4.2	1096.86
4.5	1089.08
4.8	1079.97
5.1	1069.71
5.4	1058.51
5.7	1046.62
6	1034.29
6.3	1021.8
6.6	1009.41
6.9	997.379
7.2	985.958
7.5	975.358
7.8	965.766
8.1	957.327
8.4	950.151
8.7	944.304
9	939.813
9.3	936.664
9.6	934.812
9.9	934.179
10.2	934.664
10.5	936.147
10.8	938.498
11.1	941.582
11.4	945.265
11.7	949.42
12	953.932
12.3	958.699
12.6	963.64
12.9	968.689
13.2	973.8
13.5	978.944
13.8	984.11
14.1	989.297
14.4	994.515
14.7	999.782
15	1005.12
15.3	1010.54
15.6	1016.06
15.9	1021.7
16.2	1027.46
16.5	1033.32
16.8	1039.27
17.1	1045.28
17.4	1051.31
17.7	1057.31
18	1063.22
18.3	1068.97
18.6	1074.5
18.9	1079.72
19.2	1084.55
19.5	1088.92
19.8	1092.75
20.1	1095.96
20.4	1098.48
20.7	1100.23
21	1101.17
21.3	1101.22
21.6	1100.36
21.9	1098.54
22.2	1095.75
22.5	1091.97
22.8	1087.21
23.1	1081.48
23.4	1074.84
23.7	1067.32
24	1059
24.3	1049.97
24.6	1040.34
24.9	1030.23
25.2	1019.78
25.5	1009.14
25.8	998.469
26.1	987.936
26.4	977.716
26.7	967.979
27	958.896
27.3	950.626
27.6	943.319
27.9	937.108
28.2	932.107
28.5	928.412
28.8	926.091
29.1	925.189
29.4	925.726
29.7	927.695
30	931.064
30.3	935.777
30.6	941.756
30.9	948.901
31.2	957.094
31.5	966.204
31.8	976.083
32.1	986.577
32.4	997.521
32.7	1008.75
33	1020.08
33.3	1031.35
33.6	1042.4
33.9	1053.04
34.2	1063.13
34.5	1072.52
34.8	1081.08
35.1	1088.67
35.4	1095.2
35.7	1100.59
36	1104.78
36.3	1107.73
36.6	1109.46
36.9	1109.98
37.2	1109.36
37.5	1107.7
37.8	1105.12
38.1	1101.79
38.4	1097.9
38.7	1093.65
39	1089.29
39.3	1085.05
39.6	1081.19
39.9	1077.96
40.2	1075.58
40.5	1074.28
40.8	1074.24
41.1	1075.59
41.4	1078.45
41.7	1082.86
42	1088.82
42.3	1096.27
42.6	1105.09
42.9	1115.11
43.2	1126.11
43.5	1137.85
43.8	1150.02
44.1	1162.32
44.4	1174.43
44.7	1186.04
45	1196.85
45.3	1206.59
45.6	1215.02
45.9	1221.96
46.2	1227.29
46.5	1230.94
46.8	1232.92
47.1	1233.27
47.4	1232.13
47.7	1229.68
48	1226.14
48.3	1221.78
48.6	1216.88
48.9	1211.76
49.2	1206.72
49.5	1202.05
49.8	1198.04
50.1	1194.91
50.4	1192.86
50.7	1192.04
51	1192.54
51.3	1194.38
51.6	1197.55
51.9	1201.96
52.2	1207.49
52.5	1213.97
52.8	1221.18
53.1	1228.89
53.4	1236.87
53.7	1244.84
54	1252.58
54.3	1259.83
54.6	1266.39
54.9	1272.08
55.2	1276.73
55.5	1280.24
55.8	1282.53
56.1	1283.56
56.4	1283.33
56.7	1281.87
57	1279.24
57.3	1275.52
57.6	1270.81
57.9	1265.23
58.2	1258.89
58.5	1251.93
58.8	1244.45
59.1	1236.56
59.4	1228.37
59.7	1219.96
60	1211.41
60.3	1202.76
60.6	1194.07
60.9	1185.36
61.2	1176.66
61.5	1167.97
61.8	1159.31
62.1	1150.68
62.4	1142.08
62.7	1133.52
63	1125.01
63.3	1116.58
63.6	1108.23
63.9	1100.02
64.2	1091.97
64.5	1084.14
64.8	1076.6
65.1	1069.4
65.4	1062.63
65.7	1056.35
66	1050.65
66.3	1045.62
66.6	1041.33
66.9	1037.87
67.2	1035.31
67.5	1033.72
67.8	1033.15
68.1	1033.66
68.4	1035.29
68.7	1038.04
69	1041.94
69.3	1046.96
69.6	1053.06
69.9	1060.2
70.2	1068.3
70.5	1077.26
70.8	1086.95
71.1	1097.24
71.4	1107.96
71.7	1118.93
72	1129.95
72.3	1140.83
72.6	1151.34
72.9	1161.26
73.2	1170.39
73.5	1178.5
73.8	1185.41
74.1	1190.93
74.4	1194.91
74.7	1197.22
75	1197.78
75.3	1196.52
75.6	1193.43
75.9	1188.55
76.2	1181.93
76.5	1173.7
76.8	1164.01
77.1	1153.06
77.4	1141.08
77.7	1128.33
78	1115.12
78.3	1101.74
78.6	1088.53
78.9	1075.82
79.2	1063.93
79.5	1053.2
79.8	1043.94
80.1	1036.42
80.4	1030.92
80.7	1027.66
81	1026.82
81.3	1028.55
81.6	1032.95
81.9	1040.07
82.2	1049.9
82.5	1062.38
82.8	1077.41
83.1	1094.84
83.4	1114.44
83.7	1135.98
84	1159.16
84.3	1183.65
84.6	1209.11
84.9	1235.14
85.2	1261.37
85.5	1287.39
85.8	1312.81
86.1	1337.25
86.4	1360.36
86.7	1381.8
87	1401.29
87.3	1418.58
87.6	1433.49
87.9	1445.89
88.2	1455.7
88.5	1462.94
88.8	1467.65
89.1	1469.97
89.4	1470.08
89.7	1468.21
90	1464.64
90.3	1459.69
90.6	1453.71
90.9	1447.04
91.2	1440.05
91.5	1433.08
91.8	1426.47
92.1	1420.51
92.4	1415.45
92.7	1411.52
93	1408.87
93.3	1407.62
93.6	1407.81
93.9	1409.45
94.2	1412.49
94.5	1416.84
94.8	1422.39
95.1	1428.99
95.4	1436.47
95.7	1444.69
96	1453.47
96.3	1462.68
96.6	1472.2
96.9	1481.94
97.2	1491.86
97.5	1501.94
97.8	1512.21
98.1	1522.74
98.4	1533.64
98.7	1545.05
99	1557.14
99.3	1570.09
99.6	1584.1
99.9	1599.4
100.2	1616.2
100.5	1634.71
100.8	1655.14
101.1	1677.68
101.4	1702.51
101.7	1729.8
102	1759.72
102.3	1792.4
102.6	1827.98
102.9	1866.6
103.2	1908.38
103.5	1953.46
103.8	2001.97
104.1	2054.05
104.4	2109.85
104.7	2169.52
105	2233.21
105.3	2301.09
105.6	2373.31
105.9	2450.02
106.2	2531.36
106.5	2617.46
106.8	2708.42
107.1	2804.33
107.4	2905.23
107.7	3011.16
108	3122.1
108.3	3238.02
108.6	3358.87
108.9	3484.56
109.2	3614.99
109.5	3750.06
109.8	3889.64
110.1	4033.61
110.4	4181.88
110.7	4334.35
111	4490.93
111.3	4651.58
111.6	4816.24
111.9	4984.89
112.2	5157.54
112.5	5334.17
112.8	5514.78
113.1	5699.36
113.4	5887.88
113.7	6080.28
114	6276.45
114.3	6476.22
114.6	6679.36
114.9	6885.58
115.2	7094.48
115.5	7305.61
115.8	7518.41
116.1	7732.23
116.4	7946.37
116.7	8160.03
117	8372.36
117.3	8582.46
117.6	8789.41
117.9	8992.23
118.2	9189.98
118.5	9381.72
118.8	9566.54
119.1	9743.58
119.4	9912.04
119.7	10071.2
120	10220.4
120.3	10359.1
120.6	10486.9
120.9	10603.4
121.2	10708.4
121.5	10801.8
121.8	10883.5
122.1	10953.5
122.4	11012.1
122.7	11059.4
123	11095.8
123.3	11121.6
123.6	11137.3
123.9	11143.3
124.2	11140
124.5	11128.2
124.8	11108.2
125.1	11080.7
125.4	11046.3
125.7	11005.5
126	10959
126.3	10907.2
126.6	10850.7
126.9	10790.1
127.2	10725.9
127.5	10658.6
127.8	10588.6
128.1	10516.5
128.4	10442.5
128.7	10367.1
129	10290.6
129.3	10213.4
129.6	10135.8
129.9	10058
130.2	9980.28
130.5	9902.87
130.8	9825.97
131.1	9749.77
131.4	9674.44
131.7	9600.16
132	9527.07
132.3	9455.32
132.6	9385.05
132.9	9316.4
133.2	9249.51
133.5	9184.49
133.8	9121.48
134.1	9060.58
134.4	9001.92
134.7	8945.59
135	8891.68
135.3	8840.25
135.6	8791.38
135.9	8745.1
136.2	8701.42
136.5	8660.36
136.8	8621.89
137.1	8585.96
137.4	8552.52
137.7	8521.49
138	8492.77
138.3	8466.26
138.6	8441.83
138.9	8419.36
139.2	8398.71
139.5	8379.75
139.8	8362.36
140.1	8346.39
140.4	8331.74
140.7	8318.28
141	8305.92
141.3	8294.56
141.6	8284.12
141.9	8274.52
142.2	8265.71
142.5	8257.63
142.8	8250.23
143.1	8243.47
143.4	8237.31
143.7	8231.71
144	8226.64
144.3	8222.06
144.6	8217.93
144.9	8214.21
145.2	8210.85
145.5	8207.83
145.8	8205.08
146.1	8202.56
146.4	8200.23
146.7	8198.04
147	8195.95
147.3	8193.93
147.6	8191.93
147.9	8189.93
148.2	8187.92
148.5	8185.87
148.8	8183.78
149.1	8181.66
149.4	8179.51
149.7	8177.35
150	8175.2
150.3	8173.09
150.6	8171.04
150.9	8169.1
151.2	8167.31
151.5	8165.68
151.8	8164.27
152.1	8163.11
152.4	8162.24
152.7	8161.67
153	8161.45
153.3	8161.59
153.6	8162.12
153.9	8163.06
154.2	8164.43
154.5	8166.25
154.8	8168.52
155.1	8171.28
155.4	8174.54
155.7	8178.32
156	8182.64
156.3	8187.52
156.6	8193
156.9	8199.12
157.2	8205.89
157.5	8213.36
157.8	8221.57
158.1	8230.55
158.4	8240.33
158.7	8250.95
159	8262.42
159.3	8274.77
159.6	8288
159.9	8302.11
160.2	8317.06
160.5	8332.83
160.8	8349.36
161.1	8366.58
161.4	8384.39
161.7	8402.69
162	8421.34
162.3	8440.19
162.6	8459.09
162.9	8477.86
163.2	8496.3
163.5	8514.23
163.8	8531.45
164.1	8547.75
164.4	8562.95
164.7	8576.85
165	8589.27
165.3	8600.06
165.6	8609.06
165.9	8616.15
166.2	8621.23
166.5	8624.21
166.8	8625.04
167.1	8623.68
167.4	8620.12
167.7	8614.38
168	8606.5
168.3	8596.52
168.6	8584.53
168.9	8570.6
169.2	8554.85
169.5	8537.37
169.8	8518.29
170.1	8497.74
170.4	8475.84
170.7	8452.73
171	8428.52
171.3	8403.37
171.6	8377.39
171.9	8350.72
172.2	8323.47
172.5	8295.77
172.8	8267.75
173.1	8239.5
173.4	8211.15
173.7	8182.81
174	8154.56
174.3	8126.52
174.6	8098.77
174.9	8071.4
175.2	8044.48
175.5	8018.09
175.8	7992.28
176.1	7967.1
176.4	7942.6
176.7	7918.8
177	7895.73
177.3	7873.4
177.6	7851.79
177.9	7830.9
178.2	7810.72
178.5	7791.21
178.8	7772.34
179.1	7754.08
179.4	7736.37
179.7	7719.17
180	7702.44
180.3	7686.13
180.6	7670.2
180.9	7654.59
181.2	7639.27
181.5	7624.21
181.8	7609.35
182.1	7594.68
182.4	7580.16
182.7	7565.76
183	7551.46
183.3	7537.22
183.6	7523.04
183.9	7508.87
184.2	7494.71
184.5	7480.52
184.8	7466.28
185.1	7451.97
185.4	7437.57
185.7	7423.05
186	7408.4
186.3	7393.59
186.6	7378.62
186.9	7363.48
187.2	7348.14
187.5	7332.62
187.8	7316.91
188.1	7301.01
188.4	7284.94
188.7	7268.7
189	7252.31
189.3	7235.77
189.6	7219.12
189.9	7202.35
190.2	7185.48
190.5	7168.52
190.8	7151.48
191.1	7134.37
191.4	7117.17
191.7	7099.9
192	7082.53
192.3	7065.05
192.6	7047.46
192.9	7029.73
193.2	7011.85
193.5	6993.79
193.8	6975.55
194.1	6957.11
194.4	6938.45
194.7	6919.59
195	6900.51
195.3	6881.23
195.6	6861.75
195.9	6842.11
196.2	6822.33
196.5	6802.44
196.8	6782.47
197.1	6762.48
197.4	6742.49
197.7	6722.55
198	6702.71
198.3	6682.99
198.6	6663.43
198.9	6644.06
199.2	6624.89
199.5	6605.95
199.8	6587.22
200.1	6568.71
200.4	6550.39
200.7	6532.25
201	6514.26
201.3	6496.37
201.6	6478.55
201.9	6460.74
202.2	6442.9
202.5	6424.98
202.8	6406.93
203.1	6388.72
203.4	6370.29
203.7	6351.62
204	6332.68
204.3	6313.47
204.6	6293.97
204.9	6274.2
205.2	6254.16
205.5	6233.88
205.8	6213.4
206.1	6192.75
206.4	6171.99
206.7	6151.16
207	6130.32
207.3	6109.51
207.6	6088.81
207.9	6068.25
208.2	6047.87
208.5	6027.73
208.8	6007.85
209.1	5988.24
209.4	5968.93
209.7	5949.91
210	5931.18
210.3	5912.71
210.6	5894.49
210.9	5876.48
211.2	5858.63
211.5	5840.91
211.8	5823.26
212.1	5805.65
212.4	5788.03
212.7	5770.34
213	5752.56
213.3	5734.66
213.6	5716.6
213.9	5698.38
214.2	5679.98
214.5	5661.4
214.8	5642.66
215.1	5623.78
215.4	5604.77
215.7	5585.68
216	5566.53
216.3	5547.37
216.6	5528.23
216.9	5509.16
217.2	5490.2
217.5	5471.4
217.8	5452.77
218.1	5434.37
218.4	5416.21
218.7	5398.31
219	5380.7
219.3	5363.37
219.6	5346.34
219.9	5329.61
220.2	5313.17
220.5	5297.02
220.8	5281.13
221.1	5265.5
221.4	5250.1
221.7	5234.92
222	5219.94
222.3	5205.13
222.6	5190.48
222.9	5175.95
223.2	5161.52
223.5	5147.17
223.8	5132.87
224.1	5118.6
224.4	5104.33
224.7	5090.02
225	5075.67
225.3	5061.23
225.6	5046.68
225.9	5032.01
226.2	5017.18
226.5	5002.17
226.8	4986.98
227.1	4971.58
227.4	4955.98
227.7	4940.16
228	4924.14
228.3	4907.92
228.6	4891.52
228.9	4874.96
229.2	4858.27
229.5	4841.49
229.8	4824.65
230.1	4807.8
230.4	4790.98
230.7	4774.24
231	4757.62
231.3	4741.17
231.6	4724.93
231.9	4708.93
232.2	4693.2
232.5	4677.78
232.8	4662.66
233.1	4647.86
233.4	4633.39
233.7	4619.22
234	4605.34
234.3	4591.73
234.6	4578.35
234.9	4565.17
235.2	4552.15
235.5	4539.24
235.8	4526.39
236.1	4513.57
236.4	4500.72
236.7	4487.82
237	4474.83
237.3	4461.72
237.6	4448.46
237.9	4435.05
238.2	4421.48
238.5	4407.75
238.8	4393.87
239.1	4379.85
239.4	4365.71
239.7	4351.48
240	4337.2
240.3	4322.88
240.6	4308.56
240.9	4294.28
241.2	4280.06
241.5	4265.94
241.8	4251.93
242.1	4238.06
242.4	4224.33
242.7	4210.77
243	4197.36
243.3	4184.12
243.6	4171.02
243.9	4158.06
244.2	4145.23
244.5	4132.49
244.8	4119.84
245.1	4107.25
245.4	4094.69
245.7	4082.15
246	4069.61
246.3	4057.05
246.6	4044.46
246.9	4031.83
247.2	4019.17
247.5	4006.46
247.8	3993.71
248.1	3980.94
248.4	3968.14
248.7	3955.34
249	3942.54
249.3	3929.77
249.6	3917.03
249.9	3904.33
250.2	3891.7
250.5	3879.12
250.8	3866.62
251.1	3854.18
251.4	3841.82
251.7	3829.52
252	3817.28
252.3	3805.1
252.6	3792.96
252.9	3780.86
253.2	3768.8
253.5	3756.77
253.8	3744.77
254.1	3732.8
254.4	3720.88
254.7	3709.01
255	3697.22
255.3	3685.51
255.6	3673.93
255.9	3662.48
256.2	3651.21
256.5	3640.13
256.8	3629.27
257.1	3618.65
257.4	3608.29
257.7	3598.19
258	3588.37
258.3	3578.81
258.6	3569.51
258.9	3560.42
259.2	3551.54
259.5	3542.81
259.8	3534.19
260.1	3525.63
260.4	3517.07
260.7	3508.46
261	3499.75
261.3	3490.88
261.6	3481.81
261.9	3472.51
262.2	3462.93
262.5	3453.06
262.8	3442.89
263.1	3432.44
263.4	3421.7
263.7	3410.71
264	3399.5
264.3	3388.12
264.6	3376.61
264.9	3365.04
265.2	3353.45
265.5	3341.91
265.8	3330.47
266.1	3319.17
266.4	3308.06
266.7	3297.18
267	3286.55
267.3	3276.18
267.6	3266.09
267.9	3256.26
268.2	3246.69
268.5	3237.35
268.8	3228.2
269.1	3219.22
269.4	3210.36
269.7	3201.59
270	3192.85
270.3	3184.11
270.6	3175.34
270.9	3166.49
271.2	3157.55
271.5	3148.48
271.8	3139.28
272.1	3129.93
272.4	3120.44
272.7	3110.82
273	3101.07
273.3	3091.21
273.6	3081.27
273.9	3071.26
274.2	3061.22
274.5	3051.17
274.8	3041.15
275.1	3031.16
275.4	3021.25
275.7	3011.43
276	3001.73
276.3	2992.16
276.6	2982.73
276.9	2973.45
277.2	2964.34
277.5	2955.39
277.8	2946.61
278.1	2937.99
278.4	2929.54
278.7	2921.25
279	2913.11
279.3	2905.12
279.6	2897.27
279.9	2889.56
280.2	2881.97
280.5	2874.5
280.8	2867.14
281.1	2859.88
281.4	2852.72
281.7	2845.64
282	2838.65
282.3	2831.72
282.6	2824.86
282.9	2818.05
283.2	2811.3
283.5	2804.58
283.8	2797.9
284.1	2791.25
284.4	2784.61
284.7	2777.99
285	2771.37
285.3	2764.75
285.6	2758.12
285.9	2751.48
286.2	2744.82
286.5	2738.13
286.8	2731.41
287.1	2724.65
287.4	2717.86
287.7	2711.03
288	2704.15
288.3	2697.22
288.6	2690.25
288.9	2683.23
289.2	2676.17
289.5	2669.06
289.8	2661.91
290.1	2654.73
290.4	2647.51
290.7	2640.27
291	2633.01
291.3	2625.75
291.6	2618.49
291.9	2611.25
292.2	2604.04
292.5	2596.87
292.8	2589.77
293.1	2582.75
293.4	2575.82
293.7	2569
294	2562.3
294.3	2555.75
294.6	2549.34
294.9	2543.1
295.2	2537.03
295.5	2531.14
295.8	2525.42
296.1	2519.88
296.4	2514.51
296.7	2509.3
297	2504.25
297.3	2499.32
297.6	2494.51
297.9	2489.78
298.2	2485.13
298.5	2480.51
298.8	2475.91
299.1	2471.3
299.4	2466.65
299.7	2461.94
300	2457.14
300.3	2452.24
300.6	2447.23
300.9	2442.09
301.2	2436.82
301.5	2431.42
301.8	2425.9
302.1	2420.27
302.4	2414.54
302.7	2408.73
303	2402.88
303.3	2397
303.6	2391.13
303.9	2385.3
304.2	2379.54
304.5	2373.9
304.8	2368.39
305.1	2363.05
305.4	2357.9
305.7	2352.97
306	2348.28
306.3	2343.83
306.6	2339.63
306.9	2335.68
307.2	2331.99
307.5	2328.53
307.8	2325.29
308.1	2322.25
308.4	2319.39
308.7	2316.68
309	2314.08
309.3	2311.57
309.6	2309.11
309.9	2306.67
310.2	2304.22
310.5	2301.73
310.8	2299.17
311.1	2296.53
311.4	2293.78
311.7	2290.91
312	2287.92
312.3	2284.79
312.6	2281.55
312.9	2278.18
313.2	2274.71
313.5	2271.15
313.8	2267.53
314.1	2263.86
314.4	2260.18
314.7	2256.51
315	2252.88
315.3	2249.32
315.6	2245.86
315.9	2242.53
316.2	2239.35
316.5	2236.35
316.8	2233.53
317.1	2230.93
317.4	2228.54
317.7	2226.38
318	2224.45
318.3	2222.75
318.6	2221.26
318.9	2219.98
319.2	2218.9
319.5	2217.98
319.8	2217.22
320.1	2216.57
320.4	2216.02
320.7	2215.53
321	2215.07
321.3	2214.6
321.6	2214.09
321.9	2213.52
322.2	2212.84
322.5	2212.03
322.8	2211.07
323.1	2209.94
323.4	2208.61
323.7	2207.09
324	2205.35
324.3	2203.42
324.6	2201.28
324.9	2198.95
325.2	2196.45
325.5	2193.81
325.8	2191.05
326.1	2188.2
326.4	2185.3
326.7	2182.38
327	2179.48
327.3	2176.63
327.6	2173.87
327.9	2171.24
328.2	2168.75
328.5	2166.43
328.8	2164.31
329.1	2162.39
329.4	2160.69
329.7	2159.21
330	2157.94
330.3	2156.88
330.6	2156.01
330.9	2155.32
331.2	2154.8
331.5	2154.41
331.8	2154.14
332.1	2153.96
332.4	2153.85
332.7	2153.8
333	2153.78
333.3	2153.77
333.6	2153.75
333.9	2153.73
334.2	2153.68
334.5	2153.6
334.8	2153.48
335.1	2153.32
335.4	2153.11
335.7	2152.87
336	2152.58
336.3	2152.25
336.6	2151.88
336.9	2151.47
337.2	2151.03
337.5	2150.55
337.8	2150.03
338.1	2149.48
338.4	2148.91
338.7	2148.3
339	2147.67
339.3	2147.02
339.6	2146.35
339.9	2145.67
340.2	2144.99
340.5	2144.31
340.8	2143.64
341.1	2142.99
341.4	2142.37
341.7	2141.78
342	2141.24
342.3	2140.75
342.6	2140.33
342.9	2139.98
343.2	2139.7
343.5	2139.5
343.8	2139.38
344.1	2139.35
344.4	2139.42
344.7	2139.57
345	2139.81
345.3	2140.15
345.6	2140.57
345.9	2141.08
346.2	2141.68
346.5	2142.35
346.8	2143.1
347.1	2143.92
347.4	2144.8
347.7	2145.74
348	2146.72
348.3	2147.73
348.6	2148.77
348.9	2149.81
349.2	2150.85
349.5	2151.86
349.8	2152.82
350.1	2153.73
350.4	2154.56
350.7	2155.29
351	2155.91
351.3	2156.4
351.6	2156.76
351.9	2156.97
352.2	2157.03
352.5	2156.94
352.8	2156.7
353.1	2156.32
353.4	2155.81
353.7	2155.17
354	2154.44
354.3	2153.62
354.6	2152.74
354.9	2151.82
355.2	2150.88
355.5	2149.94
355.8	2149.01
356.1	2148.11
356.4	2147.26
356.7	2146.46
357	2145.72
357.3	2145.04
357.6	2144.43
357.9	2143.88
358.2	2143.38
358.5	2142.95
358.8	2142.56
359.1	2142.22
359.4	2141.92
359.7	2141.67
360	2141.46
360.3	2141.29
360.6	2141.17
360.9	2141.12
361.2	2141.13
361.5	2141.22
361.8	2141.4
362.1	2141.68
362.4	2142.08
362.7	2142.6
363	2143.24
363.3	2144.02
363.6	2144.94
363.9	2145.98
364.2	2147.15
364.5	2148.44
364.8	2149.84
365.1	2151.32
365.4	2152.87
365.7	2154.48
366	2156.13
366.3	2157.79
366.6	2159.45
366.9	2161.1
367.2	2162.71
367.5	2164.29
367.8	2165.82
368.1	2167.3
368.4	2168.73
368.7	2170.1
369	2171.44
369.3	2172.73
369.6	2173.99
369.9	2175.21
370.2	2176.42
370.5	2177.61
370.8	2178.78
371.1	2179.93
371.4	2181.07
371.7	2182.18
372	2183.26
372.3	2184.3
372.6	2185.29
372.9	2186.22
373.2	2187.06
373.5	2187.82
373.8	2188.47
374.1	2189
374.4	2189.41
374.7	2189.69
375	2189.85
375.3	2189.87
375.6	2189.78
375.9	2189.57
376.2	2189.27
376.5	2188.88
376.8	2188.44
377.1	2187.95
377.4	2187.45
377.7	2186.96
378	2186.51
378.3	2186.11
378.6	2185.79
378.9	2185.56
379.2	2185.45
379.5	2185.45
379.8	2185.59
380.1	2185.86
380.4	2186.27
380.7	2186.8
381	2187.45
381.3	2188.21
381.6	2189.07
381.9	2190
382.2	2190.99
382.5	2192.02
382.8	2193.08
383.1	2194.14
383.4	2195.2
383.7	2196.23
384	2197.24
384.3	2198.2
384.6	2199.11
384.9	2199.98
385.2	2200.81
385.5	2201.59
385.8	2202.34
386.1	2203.06
386.4	2203.77
386.7	2204.48
387	2205.2
387.3	2205.94
387.6	2206.7
387.9	2207.51
388.2	2208.36
388.5	2209.26
388.8	2210.22
389.1	2211.22
389.4	2212.28
389.7	2213.38
390	2214.51
390.3	2215.68
390.6	2216.86
390.9	2218.05
391.2	2219.24
391.5	2220.42
391.8	2221.58
392.1	2222.72
392.4	2223.82
392.7	2224.89
393	2225.92
393.3	2226.92
393.6	2227.89
393.9	2228.83
394.2	2229.74
394.5	2230.64
394.8	2231.52
395.1	2232.39
395.4	2233.26
395.7	2234.12
396	2234.98
396.3	2235.84
396.6	2236.69
396.9	2237.54
397.2	2238.37
397.5	2239.19
397.8	2239.98
398.1	2240.74
398.4	2241.47
398.7	2242.16
399	2242.81
399.3	2243.43
399.6	2244.01
399.9	2244.56
400.2	2245.09
400.5	2245.61
400.8	2246.13
401.1	2246.66
401.4	2247.21
401.7	2247.81
402	2248.45
402.3	2249.15
402.6	2249.92
402.9	2250.76
403.2	2251.66
403.5	2252.64
403.8	2253.67
404.1	2254.76
404.4	2255.88
404.7	2257.02
405	2258.18
405.3	2259.32
405.6	2260.43
405.9	2261.51
406.2	2262.53
406.5	2263.49
406.8	2264.38
407.1	2265.21
407.4	2265.99
407.7	2266.72
408	2267.43
408.3	2268.15
408.6	2268.9
408.9	2269.73
409.2	2270.67
409.5	2271.78
409.8	2273.09
410.1	2274.66
410.4	2276.54
410.7	2278.78
411	2281.42
411.3	2284.51
411.6	2288.08
411.9	2292.17
412.2	2296.8
412.5	2301.98
412.8	2307.73
413.1	2314.05
413.4	2320.91
413.7	2328.3
414	2336.18
414.3	2344.49
414.6	2353.18
414.9	2362.17
415.2	2371.38
415.5	2380.7
415.8	2390.04
416.1	2399.28
416.4	2408.3
416.7	2416.97
417	2425.18
417.3	2432.78
417.6	2439.68
417.9	2445.75
418.2	2450.9
418.5	2455.03
418.8	2458.08
419.1	2460
419.4	2460.76
419.7	2460.34
420	2458.76
420.3	2456.06
420.6	2452.3
420.9	2447.55
421.2	2441.92
421.5	2435.5
421.8	2428.43
422.1	2420.84
422.4	2412.88
422.7	2404.66
423	2396.35
423.3	2388.06
423.6	2379.92
423.9	2372.05
424.2	2364.53
424.5	2357.44
424.8	2350.86
425.1	2344.83
425.4	2339.38
425.7	2334.54
426	2330.29
426.3	2326.64
426.6	2323.56
426.9	2321.02
427.2	2319
427.5	2317.45
427.8	2316.32
428.1	2315.58
428.4	2315.19
428.7	2315.09
429	2315.26
429.3	2315.65
429.6	2316.24
429.9	2316.97
430.2	2317.83
430.5	2318.79
430.8	2319.81
431.1	2320.87
431.4	2321.94
431.7	2323.01
432	2324.04
432.3	2325.03
432.6	2325.94
432.9	2326.77
433.2	2327.49
433.5	2328.11
433.8	2328.62
434.1	2329.01
434.4	2329.29
434.7	2329.47
435	2329.55
435.3	2329.56
435.6	2329.51
435.9	2329.42
436.2	2329.3
436.5	2329.19
436.8	2329.11
437.1	2329.07
437.4	2329.09
437.7	2329.19
438	2329.37
438.3	2329.66
438.6	2330.04
438.9	2330.52
439.2	2331.11
439.5	2331.79
439.8	2332.57
440.1	2333.42
440.4	2334.35
440.7	2335.34
441	2336.38
441.3	2337.48
441.6	2338.61
441.9	2339.77
442.2	2340.97
442.5	2342.2
442.8	2343.45
443.1	2344.73
443.4	2346.04
443.7	2347.37
444	2348.73
444.3	2350.13
444.6	2351.55
444.9	2352.99
445.2	2354.46
445.5	2355.95
445.8	2357.45
446.1	2358.96
446.4	2360.46
446.7	2361.95
447	2363.42
447.3	2364.85
447.6	2366.23
447.9	2367.55
448.2	2368.8
448.5	2369.96
448.8	2371.03
449.1	2371.98
449.4	2372.81
449.7	2373.51
450	2374.06
450.3	2374.46
450.6	2374.7
450.9	2374.77
451.2	2374.66
451.5	2374.38
451.8	2373.93
452.1	2373.3
452.4	2372.51
452.7	2371.56
453	2370.45
453.3	2369.22
453.6	2367.87
453.9	2366.42
454.2	2364.9
454.5	2363.33
454.8	2361.72
455.1	2360.12
455.4	2358.54
455.7	2357
456	2355.53
456.3	2354.14
456.6	2352.85
456.9	2351.67
457.2	2350.61
457.5	2349.67
457.8	2348.85
458.1	2348.16
458.4	2347.57
458.7	2347.08
459	2346.68
459.3	2346.34
459.6	2346.06
459.9	2345.82
460.2	2345.59
460.5	2345.36
460.8	2345.12
461.1	2344.86
461.4	2344.56
461.7	2344.21
462	2343.82
462.3	2343.37
462.6	2342.86
462.9	2342.31
463.2	2341.71
463.5	2341.08
463.8	2340.41
464.1	2339.72
464.4	2339.01
464.7	2338.3
465	2337.59
465.3	2336.89
465.6	2336.21
465.9	2335.55
466.2	2334.91
466.5	2334.29
466.8	2333.7
467.1	2333.12
467.4	2332.56
467.7	2332.02
468	2331.47
468.3	2330.93
468.6	2330.37
468.9	2329.8
469.2	2329.2
469.5	2328.58
469.8	2327.93
470.1	2327.24
470.4	2326.53
470.7	2325.78
471	2325
471.3	2324.21
471.6	2323.4
471.9	2322.59
472.2	2321.79
472.5	2321
472.8	2320.23
473.1	2319.5
473.4	2318.8
473.7	2318.15
474	2317.54
474.3	2316.97
474.6	2316.45
474.9	2315.95
475.2	2315.49
475.5	2315.03
475.8	2314.58
476.1	2314.11
476.4	2313.61
476.7	2313.06
477	2312.45
477.3	2311.77
477.6	2311.01
477.9	2310.16
478.2	2309.22
478.5	2308.19
478.8	2307.07
479.1	2305.89
479.4	2304.64
479.7	2303.36
480	2302.05
480.3	2300.75
480.6	2299.49
480.9	2298.28
481.2	2297.16
481.5	2296.15
481.8	2295.28
482.1	2294.56
482.4	2294.02
482.7	2293.67
483	2293.52
483.3	2293.58
483.6	2293.85
483.9	2294.32
484.2	2294.98
484.5	2295.82
484.8	2296.83
485.1	2297.99
485.4	2299.26
485.7	2300.62
486	2302.04
486.3	2303.49
486.6	2304.93
486.9	2306.33
487.2	2307.66
487.5	2308.87
487.8	2309.95
488.1	2310.86
488.4	2311.58
488.7	2312.08
489	2312.35
489.3	2312.37
489.6	2312.13
489.9	2311.65
490.2	2310.91
490.5	2309.94
490.8	2308.76
491.1	2307.38
491.4	2305.84
491.7	2304.17
492	2302.4
492.3	2300.57
492.6	2298.73
492.9	2296.91
493.2	2295.14
493.5	2293.45
493.8	2291.87
494.1	2290.43
494.4	2289.12
494.7	2287.97
495	2286.96
495.3	2286.1
495.6	2285.36
495.9	2284.72
496.2	2284.16
496.5	2283.65
496.8	2283.17
497.1	2282.67
497.4	2282.13
497.7	2281.52
498	2280.82
498.3	2280.02
498.6	2279.09
498.9	2278.04
499.2	2276.86
499.5	2275.56
499.8	2274.16
500.1	2272.67
500.4	2271.11
500.7	2269.51
501	2267.89
501.3	2266.29
501.6	2264.71
501.9	2263.2
502.2	2261.76
502.5	2260.41
502.8	2259.17
503.1	2258.03
503.4	2257.01
503.7	2256.1
504	2255.29
504.3	2254.58
504.6	2253.96
504.9	2253.4
505.2	2252.9
505.5	2252.45
505.8	2252.03
506.1	2251.63
506.4	2251.24
506.7	2250.87
507	2250.5
507.3	2250.13
507.6	2249.76
507.9	2249.4
508.2	2249.06
508.5	2248.73
508.8	2248.42
509.1	2248.14
509.4	2247.89
509.7	2247.66
510	2247.47
510.3	2247.31
510.6	2247.17
510.9	2247.05
511.2	2246.94
511.5	2246.84
511.8	2246.72
512.1	2246.59
512.4	2246.42
512.7	2246.22
513	2245.96
513.3	2245.65
513.6	2245.28
513.9	2244.84
514.2	2244.33
514.5	2243.76
514.8	2243.12
515.1	2242.43
515.4	2241.68
515.7	2240.9
516	2240.08
516.3	2239.25
516.6	2238.4
516.9	2237.55
517.2	2236.71
517.5	2235.88
517.8	2235.07
518.1	2234.28
518.4	2233.52
518.7	2232.78
519	2232.07
519.3	2231.37
519.6	2230.69
519.9	2230.01
520.2	2229.34
520.5	2228.67
520.8	2227.99
521.1	2227.31
521.4	2226.61
521.7	2225.9
522	2225.17
522.3	2224.44
522.6	2223.7
522.9	2222.97
523.2	2222.23
523.5	2221.51
523.8	2220.8
524.1	2220.12
524.4	2219.46
524.7	2218.82
525	2218.21
525.3	2217.62
525.6	2217.05
525.9	2216.5
526.2	2215.95
526.5	2215.39
526.8	2214.81
527.1	2214.22
527.4	2213.59
527.7	2212.93
528	2212.22
528.3	2211.47
528.6	2210.69
528.9	2209.87
529.2	2209.04
529.5	2208.21
529.8	2207.4
530.1	2206.62
530.4	2205.9
530.7	2205.27
531	2204.74
531.3	2204.33
531.6	2204.06
531.9	2203.93
532.2	2203.96
532.5	2204.13
532.8	2204.44
533.1	2204.86
533.4	2205.38
533.7	2205.96
534	2206.57
534.3	2207.18
534.6	2207.74
534.9	2208.21
535.2	2208.56
535.5	2208.77
535.8	2208.8
536.1	2208.63
536.4	2208.27
536.7	2207.72
537	2206.98
537.3	2206.07
537.6	2205.02
537.9	2203.88
538.2	2202.67
538.5	2201.44
538.8	2200.24
539.1	2199.1
539.4	2198.08
539.7	2197.2
540	2196.48
540.3	2195.96
540.6	2195.62
540.9	2195.48
541.2	2195.51
541.5	2195.71
541.8	2196.03
542.1	2196.45
542.4	2196.92
542.7	2197.41
543	2197.86
543.3	2198.24
543.6	2198.51
543.9	2198.65
544.2	2198.63
544.5	2198.43
544.8	2198.05
545.1	2197.49
545.4	2196.76
545.7	2195.88
546	2194.88
546.3	2193.79
546.6	2192.63
546.9	2191.44
547.2	2190.26
547.5	2189.1
547.8	2188.01
548.1	2186.98
548.4	2186.06
548.7	2185.22
549	2184.49
549.3	2183.85
549.6	2183.3
549.9	2182.81
550.2	2182.37
550.5	2181.96
550.8	2181.56
551.1	2181.15
551.4	2180.71
551.7	2180.23
552	2179.7
552.3	2179.11
552.6	2178.48
552.9	2177.79
553.2	2177.07
553.5	2176.33
553.8	2175.58
554.1	2174.85
554.4	2174.15
554.7	2173.5
555	2172.92
555.3	2172.41
555.6	2171.99
555.9	2171.66
556.2	2171.42
556.5	2171.26
556.8	2171.16
557.1	2171.11
557.4	2171.08
557.7	2171.06
558	2171
558.3	2170.89
558.6	2170.69
558.9	2170.37
559.2	2169.91
559.5	2169.29
559.8	2168.5
560.1	2167.52
560.4	2166.35
560.7	2164.99
561	2163.44
561.3	2161.73
561.6	2159.87
561.9	2157.88
562.2	2155.8
562.5	2153.65
562.8	2151.48
563.1	2149.3
563.4	2147.17
563.7	2145.11
564	2143.15
564.3	2141.32
564.6	2139.65
564.9	2138.15
565.2	2136.84
565.5	2135.73
565.8	2134.83
566.1	2134.13
566.4	2133.62
566.7	2133.3
567	2133.15
567.3	2133.15
567.6	2133.28
567.9	2133.52
568.2	2133.85
568.5	2134.24
568.8	2134.68
569.1	2135.14
569.4	2135.61
569.7	2136.08
570	2136.54
570.3	2136.99
570.6	2137.44
570.9	2137.88
571.2	2138.34
571.5	2138.82
571.8	2139.33
572.1	2139.91
572.4	2140.56
572.7	2141.3
573	2142.14
573.3	2143.1
573.6	2144.17
573.9	2145.35
574.2	2146.64
574.5	2148.02
574.8	2149.47
575.1	2150.95
575.4	2152.43
575.7	2153.87
576	2155.22
576.3	2156.43
576.6	2157.47
576.9	2158.28
577.2	2158.82
577.5	2159.05
577.8	2158.95
578.1	2158.5
578.4	2157.69
578.7	2156.52
579	2155
579.3	2153.15
579.6	2151.01
579.9	2148.61
580.2	2146.01
580.5	2143.26
580.8	2140.41
581.1	2137.52
581.4	2134.66
581.7	2131.87
582	2129.2
582.3	2126.69
582.6	2124.38
582.9	2122.28
583.2	2120.41
583.5	2118.78
583.8	2117.37
584.1	2116.17
584.4	2115.16
584.7	2114.31
585	2113.6
585.3	2112.98
585.6	2112.42
585.9	2111.9
586.2	2111.37
586.5	2110.82
586.8	2110.22
587.1	2109.55
587.4	2108.81
587.7	2108
588	2107.1
588.3	2106.13
588.6	2105.1
588.9	2104.01
589.2	2102.89
589.5	2101.74
589.8	2100.58
590.1	2099.42
590.4	2098.27
590.7	2097.14
591	2096.04
591.3	2094.97
591.6	2093.93
591.9	2092.92
592.2	2091.95
592.5	2091
592.8	2090.08
593.1	2089.19
593.4	2088.33
593.7	2087.5
594	2086.69
594.3	2085.92
594.6	2085.19
594.9	2084.51
595.2	2083.88
595.5	2083.31
595.8	2082.81
596.1	2082.39
596.4	2082.04
596.7	2081.77
597	2081.59
597.3	2081.48
597.6	2081.43
597.9	2081.45
598.2	2081.52
598.5	2081.62
598.8	2081.75
599.1	2081.87
599.4	2081.98
[truncated: 12,502 more rows]

## Sheet: Site 2-3
Raman shift (cm-1)	count
0	1189.13
0.3	1209.35
0.6	1225.14
0.9	1236.17
1.2	1242.44
1.5	1244.06
1.8	1241.29
2.1	1234.63
2.4	1224.64
2.7	1212
3	1197.51
3.3	1181.96
3.6	1166.16
3.9	1150.88
4.2	1136.86
4.5	1124.65
4.8	1114.81
5.1	1107.68
5.4	1103.4
5.7	1102.11
6	1103.63
6.3	1107.71
6.6	1114
6.9	1121.96
7.2	1131
7.5	1140.49
7.8	1149.74
8.1	1158.05
8.4	1164.81
8.7	1169.4
9	1171.28
9.3	1170.1
9.6	1165.52
9.9	1157.37
10.2	1145.66
10.5	1130.43
10.8	1111.94
11.1	1090.54
11.4	1066.62
11.7	1040.74
12	1013.48
12.3	985.437
12.6	957.267
12.9	929.603
13.2	903.031
13.5	878.115
13.8	855.366
14.1	835.171
14.4	817.896
14.7	803.784
15	792.972
15.3	785.567
15.6	781.537
15.9	780.795
16.2	783.218
16.5	788.589
16.8	796.681
17.1	807.241
17.4	819.993
17.7	834.662
18	850.995
18.3	868.741
18.6	887.673
18.9	907.605
19.2	928.359
19.5	949.791
19.8	971.788
20.1	994.241
20.4	1017.06
20.7	1040.18
21	1063.5
21.3	1086.94
21.6	1110.4
21.9	1133.78
22.2	1156.95
22.5	1179.75
22.8	1202.04
23.1	1223.62
23.4	1244.32
23.7	1263.94
24	1282.3
24.3	1299.22
24.6	1314.55
24.9	1328.14
25.2	1339.9
25.5	1349.77
25.8	1357.72
26.1	1363.8
26.4	1368.05
26.7	1370.6
27	1371.61
27.3	1371.27
27.6	1369.79
27.9	1367.43
28.2	1364.44
28.5	1361.05
28.8	1357.53
29.1	1354.09
29.4	1350.94
29.7	1348.25
30	1346.13
30.3	1344.68
30.6	1343.94
30.9	1343.9
31.2	1344.53
31.5	1345.74
31.8	1347.43
32.1	1349.46
32.4	1351.71
32.7	1354.01
33	1356.23
33.3	1358.24
33.6	1359.93
33.9	1361.23
34.2	1362.09
34.5	1362.49
34.8	1362.46
35.1	1362.06
35.4	1361.4
35.7	1360.59
36	1359.78
36.3	1359.14
36.6	1358.86
36.9	1359.1
37.2	1360.04
37.5	1361.84
37.8	1364.63
38.1	1368.53
38.4	1373.6
38.7	1379.89
39	1387.4
39.3	1396.08
39.6	1405.86
39.9	1416.6
40.2	1428.17
40.5	1440.37
40.8	1453
41.1	1465.81
41.4	1478.56
41.7	1491
42	1502.87
42.3	1513.92
42.6	1523.89
42.9	1532.57
43.2	1539.75
43.5	1545.23
43.8	1548.87
44.1	1550.52
44.4	1550.12
44.7	1547.58
45	1542.89
45.3	1536.07
45.6	1527.15
45.9	1516.24
46.2	1503.44
46.5	1488.91
46.8	1472.84
47.1	1455.43
47.4	1436.92
47.7	1417.57
48	1397.65
48.3	1377.43
48.6	1357.21
48.9	1337.28
49.2	1317.92
49.5	1299.4
49.8	1281.98
50.1	1265.88
50.4	1251.32
50.7	1238.46
51	1227.44
51.3	1218.37
51.6	1211.3
51.9	1206.25
52.2	1203.21
52.5	1202.11
52.8	1202.87
53.1	1205.35
53.4	1209.41
53.7	1214.88
54	1221.57
54.3	1229.28
54.6	1237.83
54.9	1247.01
55.2	1256.66
55.5	1266.61
55.8	1276.72
56.1	1286.89
56.4	1297.04
56.7	1307.12
57	1317.12
57.3	1327.06
57.6	1336.98
57.9	1346.95
58.2	1357.08
58.5	1367.47
58.8	1378.24
59.1	1389.52
59.4	1401.42
59.7	1414.05
60	1427.49
60.3	1441.81
60.6	1457.03
60.9	1473.15
61.2	1490.13
61.5	1507.9
61.8	1526.32
62.1	1545.24
62.4	1564.48
62.7	1583.81
63	1603
63.3	1621.79
63.6	1639.91
63.9	1657.11
64.2	1673.14
64.5	1687.76
64.8	1700.77
65.1	1711.99
65.4	1721.29
65.7	1728.58
66	1733.82
66.3	1736.99
66.6	1738.18
66.9	1737.47
67.2	1734.98
67.5	1730.91
67.8	1725.46
68.1	1718.87
68.4	1711.38
68.7	1703.26
69	1694.77
69.3	1686.19
69.6	1677.77
69.9	1669.77
70.2	1662.43
70.5	1655.96
70.8	1650.57
71.1	1646.45
71.4	1643.75
71.7	1642.63
72	1643.22
72.3	1645.63
72.6	1649.95
72.9	1656.26
73.2	1664.61
73.5	1675.03
73.8	1687.51
74.1	1702.04
74.4	1718.55
74.7	1736.91
75	1757
75.3	1778.59
75.6	1801.44
75.9	1825.24
76.2	1849.61
76.5	1874.15
76.8	1898.41
77.1	1921.87
77.4	1944.04
77.7	1964.38
78	1982.35
78.3	1997.47
78.6	2009.29
78.9	2017.39
79.2	2021.47
79.5	2021.31
79.8	2016.79
80.1	2007.97
80.4	1994.98
80.7	1978.1
81	1957.82
81.3	1934.63
81.6	1909.25
81.9	1882.46
82.2	1855.08
82.5	1828.05
82.8	1802.3
83.1	1778.74
83.4	1758.25
83.7	1741.69
84	1729.71
84.3	1722.94
84.6	1721.85
84.9	1726.65
85.2	1737.51
85.5	1754.34
85.8	1776.86
86.1	1804.71
86.4	1837.27
86.7	1873.87
87	1913.71
87.3	1955.88
87.6	1999.48
87.9	2043.59
88.2	2087.26
88.5	2129.65
88.8	2170.01
89.1	2207.62
89.4	2241.97
89.7	2272.69
90	2299.45
90.3	2322.22
90.6	2341.03
90.9	2356.05
91.2	2367.65
91.5	2376.21
91.8	2382.25
92.1	2386.37
92.4	2389.17
92.7	2391.28
93	2393.33
93.3	2395.93
93.6	2399.6
93.9	2404.86
94.2	2412.1
94.5	2421.65
94.8	2433.79
95.1	2448.65
95.4	2466.35
95.7	2486.9
96	2510.25
96.3	2536.32
96.6	2564.97
96.9	2596.05
97.2	2629.4
97.5	2664.86
97.8	2702.27
98.1	2741.51
98.4	2782.47
98.7	2825.08
99	2869.32
99.3	2915.18
99.6	2962.73
99.9	3012.06
100.2	3063.28
100.5	3116.58
100.8	3172.15
101.1	3230.23
101.4	3291.08
101.7	3355
102	3422.3
102.3	3493.35
102.6	3568.51
102.9	3648.19
103.2	3732.82
103.5	3822.85
103.8	3918.77
104.1	4021.08
104.4	4130.31
104.7	4247.01
105	4371.74
105.3	4505.07
105.6	4647.58
105.9	4799.85
106.2	4962.44
106.5	5135.9
106.8	5320.73
107.1	5517.44
107.4	5726.47
107.7	5948.2
108	6182.97
108.3	6431.07
108.6	6692.68
108.9	6967.98
109.2	7257.02
109.5	7559.8
109.8	7876.26
110.1	8206.25
110.4	8549.57
110.7	8905.94
111	9275.02
111.3	9656.42
111.6	10049.7
111.9	10454.2
112.2	10869.5
112.5	11294.8
112.8	11729.5
113.1	12172.7
113.4	12623.6
113.7	13081.3
114	13544.7
114.3	14012.8
114.6	14484.4
114.9	14958.3
115.2	15433.1
115.5	15907.6
115.8	16380.3
116.1	16849.7
116.4	17314.5
116.7	17773
117	18223.8
117.3	18665.4
117.6	19096.4
117.9	19515.4
118.2	19921.2
118.5	20312.4
118.8	20688
119.1	21047
119.4	21388.6
119.7	21712.1
120	22016.8
120.3	22302.4
120.6	22568.6
120.9	22815.3
121.2	23042.5
121.5	23250.2
121.8	23438.6
122.1	23608.2
122.4	23759.3
122.7	23892.4
123	24007.9
123.3	24106.3
123.6	24188.4
123.9	24254.5
124.2	24305.4
124.5	24341.6
124.8	24363.5
125.1	24371.9
125.4	24367.2
125.7	24350
126	24320.8
126.3	24280.1
126.6	24228.5
126.9	24166.4
127.2	24094.5
127.5	24013.2
127.8	23923.2
128.1	23825.1
128.4	23719.4
128.7	23606.8
129	23488.1
129.3	23363.8
129.6	23234.6
129.9	23101.3
130.2	22964.6
130.5	22825.2
130.8	22683.7
131.1	22541
131.4	22397.5
131.7	22254.1
132	22111.2
132.3	21969.5
132.6	21829.5
132.9	21691.7
133.2	21556.5
133.5	21424.3
133.8	21295.5
134.1	21170.3
134.4	21049
134.7	20931.8
135	20818.9
135.3	20710.3
135.6	20606.2
135.9	20506.5
136.2	20411.3
136.5	20320.5
136.8	20234.1
137.1	20151.9
137.4	20073.9
137.7	19999.9
138	19929.7
138.3	19863.4
138.6	19800.5
138.9	19741.1
139.2	19684.9
139.5	19631.8
139.8	19581.6
140.1	19534.1
140.4	19489.3
140.7	19446.9
141	19406.7
141.3	19368.8
141.6	19332.8
141.9	19298.8
142.2	19266.5
142.5	19235.9
142.8	19206.8
143.1	19179.1
143.4	19152.6
143.7	19127.3
144	19103
144.3	19079.6
144.6	19056.9
144.9	19034.9
145.2	19013.3
145.5	18992
145.8	18971
146.1	18950.1
146.4	18929.2
146.7	18908.2
147	18887.1
147.3	18865.7
147.6	18844.1
147.9	18822.2
148.2	18800
148.5	18777.5
148.8	18754.8
149.1	18731.8
149.4	18708.7
149.7	18685.5
150	18662.3
150.3	18639.1
150.6	18616.2
150.9	18593.4
151.2	18571
151.5	18549.1
151.8	18527.6
152.1	18506.6
152.4	18486.3
152.7	18466.6
153	18447.7
153.3	18429.5
153.6	18412
153.9	18395.3
154.2	18379.3
154.5	18364.2
154.8	18349.8
155.1	18336.2
155.4	18323.4
155.7	18311.4
156	18300.2
156.3	18289.9
156.6	18280.3
156.9	18271.7
157.2	18264
157.5	18257.2
157.8	18251.3
158.1	18246.5
158.4	18242.7
158.7	18240.1
159	18238.5
159.3	18238.1
159.6	18238.9
159.9	18240.9
160.2	18244.1
160.5	18248.4
160.8	18253.9
161.1	18260.6
161.4	18268.2
161.7	18276.9
162	18286.5
162.3	18296.8
162.6	18307.9
162.9	18319.4
163.2	18331.3
163.5	18343.4
163.8	18355.4
164.1	18367.3
164.4	18378.8
164.7	18389.6
165	18399.6
165.3	18408.5
165.6	18416.1
165.9	18422.2
166.2	18426.5
166.5	18428.9
166.8	18429.2
167.1	18427.1
167.4	18422.5
167.7	18415.2
168	18405.2
168.3	18392.4
168.6	18376.6
168.9	18357.8
169.2	18336
169.5	18311.2
169.8	18283.4
170.1	18252.7
170.4	18219.3
170.7	18183.1
171	18144.4
171.3	18103.3
171.6	18060
171.9	18014.7
172.2	17967.6
172.5	17918.9
172.8	17868.8
173.1	17817.6
173.4	17765.4
173.7	17712.6
174	17659.3
174.3	17605.7
174.6	17552.1
174.9	17498.6
175.2	17445.4
175.5	17392.7
175.8	17340.6
176.1	17289.2
176.4	17238.7
176.7	17189.2
177	17140.7
177.3	17093.3
177.6	17047.1
177.9	17002.1
178.2	16958.3
178.5	16915.8
178.8	16874.6
179.1	16834.5
179.4	16795.7
179.7	16758
180	16721.4
180.3	16685.8
180.6	16651.2
180.9	16617.4
181.2	16584.3
181.5	16551.9
181.8	16520
182.1	16488.5
182.4	16457.3
182.7	16426.2
183	16395.1
183.3	16363.9
183.6	16332.5
183.9	16300.8
184.2	16268.6
184.5	16235.8
184.8	16202.5
185.1	16168.5
185.4	16133.8
185.7	16098.4
186	16062.2
186.3	16025.3
186.6	15987.6
186.9	15949.3
187.2	15910.2
187.5	15870.6
187.8	15830.4
188.1	15789.6
188.4	15748.5
188.7	15706.9
189	15665
189.3	15622.9
189.6	15580.5
189.9	15538.1
190.2	15495.4
190.5	15452.8
190.8	15410
191.1	15367.3
191.4	15324.5
191.7	15281.8
192	15239.1
192.3	15196.4
192.6	15153.8
192.9	15111.2
193.2	15068.6
193.5	15026.1
193.8	14983.6
194.1	14941.1
194.4	14898.6
194.7	14856.2
195	14813.8
195.3	14771.5
195.6	14729.3
195.9	14687.2
196.2	14645.1
196.5	14603.1
196.8	14561.3
197.1	14519.6
197.4	14478.1
197.7	14436.7
198	14395.5
198.3	14354.4
198.6	14313.5
198.9	14272.8
199.2	14232.2
199.5	14191.7
199.8	14151.3
200.1	14111
200.4	14070.8
200.7	14030.5
201	13990.2
201.3	13949.8
201.6	13909.3
201.9	13868.6
202.2	13827.7
202.5	13786.6
202.8	13745.2
203.1	13703.5
203.4	13661.5
203.7	13619.1
204	13576.5
204.3	13533.5
204.6	13490.3
204.9	13446.8
205.2	13403.1
205.5	13359.2
205.8	13315.2
206.1	13271.2
206.4	13227.2
206.7	13183.2
207	13139.4
207.3	13095.8
207.6	13052.4
207.9	13009.2
208.2	12966.4
208.5	12923.9
208.8	12881.8
209.1	12840
209.4	12798.5
209.7	12757.4
210	12716.6
210.3	12676
210.6	12635.7
210.9	12595.7
211.2	12555.8
211.5	12516
211.8	12476.3
212.1	12436.8
212.4	12397.3
212.7	12357.9
213	12318.5
213.3	12279.1
213.6	12239.8
213.9	12200.6
214.2	12161.5
214.5	12122.5
214.8	12083.6
215.1	12044.9
215.4	12006.3
215.7	11967.9
216	11929.8
216.3	11891.9
216.6	11854.2
216.9	11816.7
217.2	11779.4
217.5	11742.4
217.8	11705.5
218.1	11668.8
218.4	11632.2
218.7	11595.7
219	11559.2
219.3	11522.7
219.6	11486.3
219.9	11449.8
220.2	11413.2
220.5	11376.5
220.8	11339.6
221.1	11302.7
221.4	11265.5
221.7	11228.2
222	11190.8
222.3	11153.2
222.6	11115.4
222.9	11077.6
223.2	11039.6
223.5	11001.5
223.8	10963.3
224.1	10925.1
224.4	10886.9
224.7	10848.6
225	10810.4
225.3	10772.3
225.6	10734.2
225.9	10696.2
226.2	10658.4
226.5	10620.7
226.8	10583.2
227.1	10545.9
227.4	10508.9
227.7	10472.1
228	10435.7
228.3	10399.6
228.6	10363.9
228.9	10328.7
229.2	10293.9
229.5	10259.6
229.8	10225.9
230.1	10192.7
230.4	10160.1
230.7	10128.1
231	10096.8
231.3	10066.1
231.6	10036.1
231.9	10006.7
232.2	9977.97
232.5	9949.83
232.8	9922.26
233.1	9895.21
233.4	9868.64
233.7	9842.48
234	9816.66
234.3	9791.11
234.6	9765.75
234.9	9740.49
235.2	9715.26
235.5	9689.97
235.8	9664.54
236.1	9638.9
236.4	9613
236.7	9586.76
237	9560.14
237.3	9533.12
237.6	9505.66
237.9	9477.76
238.2	9449.42
238.5	9420.65
238.8	9391.49
239.1	9361.95
239.4	9332.1
239.7	9301.97
240	9271.62
240.3	9241.12
240.6	9210.52
240.9	9179.88
241.2	9149.26
241.5	9118.7
241.8	9088.26
242.1	9057.97
242.4	9027.87
242.7	8997.99
243	8968.34
243.3	8938.94
243.6	8909.79
243.9	8880.89
244.2	8852.24
244.5	8823.82
244.8	8795.63
245.1	8767.64
245.4	8739.85
245.7	8712.23
246	8684.77
246.3	8657.44
246.6	8630.23
246.9	8603.13
247.2	8576.12
247.5	8549.18
247.8	8522.31
248.1	8495.49
248.4	8468.7
248.7	8441.95
249	8415.21
249.3	8388.49
249.6	8361.78
249.9	8335.08
250.2	8308.37
250.5	8281.67
250.8	8254.98
251.1	8228.31
251.4	8201.66
251.7	8175.06
252	8148.51
252.3	8122.04
252.6	8095.67
252.9	8069.42
253.2	8043.33
253.5	8017.42
253.8	7991.72
254.1	7966.24
254.4	7941.01
254.7	7916.05
255	7891.37
255.3	7866.97
255.6	7842.84
255.9	7818.98
256.2	7795.38
256.5	7771.99
256.8	7748.81
257.1	7725.77
257.4	7702.86
257.7	7680.01
258	7657.19
258.3	7634.34
258.6	7611.44
258.9	7588.43
259.2	7565.29
259.5	7542
259.8	7518.53
260.1	7494.9
260.4	7471.1
260.7	7447.16
261	7423.1
261.3	7398.98
261.6	7374.83
261.9	7350.71
262.2	7326.69
262.5	7302.84
262.8	7279.21
263.1	7255.87
263.4	7232.88
263.7	7210.3
264	7188.16
264.3	7166.49
264.6	7145.32
264.9	7124.65
265.2	7104.46
265.5	7084.75
265.8	7065.47
266.1	7046.58
266.4	7028.02
266.7	7009.73
267	6991.64
267.3	6973.68
267.6	6955.78
267.9	6937.88
268.2	6919.9
268.5	6901.81
268.8	6883.55
269.1	6865.1
269.4	6846.42
269.7	6827.51
270	6808.38
270.3	6789.03
270.6	6769.49
270.9	6749.77
271.2	6729.93
271.5	6709.98
271.8	6689.97
272.1	6669.93
272.4	6649.89
272.7	6629.87
273	6609.9
273.3	6589.98
273.6	6570.11
273.9	6550.29
274.2	6530.52
274.5	6510.76
274.8	6491.01
275.1	6471.23
275.4	6451.41
275.7	6431.53
276	6411.57
276.3	6391.53
276.6	6371.39
276.9	6351.18
277.2	6330.9
277.5	6310.58
277.8	6290.26
278.1	6269.98
278.4	6249.77
278.7	6229.71
279	6209.82
279.3	6190.18
279.6	6170.82
279.9	6151.8
280.2	6133.15
280.5	6114.89
280.8	6097.06
281.1	6079.65
281.4	6062.67
281.7	6046.12
282	6029.97
282.3	6014.2
282.6	5998.78
282.9	5983.68
283.2	5968.85
283.5	5954.27
283.8	5939.9
284.1	5925.71
284.4	5911.66
284.7	5897.75
285	5883.94
285.3	5870.22
285.6	5856.59
285.9	5843.04
286.2	5829.56
286.5	5816.15
286.8	5802.81
287.1	5789.52
287.4	5776.28
287.7	5763.09
288	5749.92
288.3	5736.75
288.6	5723.56
288.9	5710.32
289.2	5697.02
289.5	5683.61
289.8	5670.07
290.1	5656.37
290.4	5642.51
290.7	5628.45
291	5614.2
291.3	5599.76
291.6	5585.13
291.9	5570.33
292.2	5555.39
292.5	5540.35
292.8	5525.24
293.1	5510.12
293.4	5495.03
293.7	5480.02
294	5465.15
294.3	5450.47
294.6	5436.01
294.9	5421.83
295.2	5407.95
295.5	5394.39
295.8	5381.18
296.1	5368.31
296.4	5355.79
296.7	5343.61
297	5331.75
297.3	5320.19
297.6	5308.91
297.9	5297.88
298.2	5287.07
298.5	5276.46
298.8	5266.03
299.1	5255.74
299.4	5245.59
299.7	5235.56
300	5225.64
300.3	5215.84
300.6	5206.14
300.9	5196.56
301.2	5187.11
301.5	5177.79
301.8	5168.62
302.1	5159.6
302.4	5150.75
302.7	5142.08
303	5133.6
303.3	5125.31
303.6	5117.21
303.9	5109.31
304.2	5101.59
304.5	5094.06
304.8	5086.7
305.1	5079.51
305.4	5072.47
305.7	5065.57
306	5058.79
306.3	5052.12
306.6	5045.54
306.9	5039.03
307.2	5032.58
307.5	5026.18
307.8	5019.8
308.1	5013.45
308.4	5007.1
308.7	5000.74
309	4994.37
309.3	4987.98
309.6	4981.55
309.9	4975.08
310.2	4968.57
310.5	4962.02
310.8	4955.41
311.1	4948.76
311.4	4942.06
311.7	4935.32
312	4928.53
312.3	4921.72
312.6	4914.88
312.9	4908.02
313.2	4901.15
313.5	4894.29
313.8	4887.44
314.1	4880.63
314.4	4873.85
314.7	4867.13
315	4860.47
315.3	4853.88
315.6	4847.39
315.9	4840.98
316.2	4834.68
316.5	4828.5
316.8	4822.43
317.1	4816.49
317.4	4810.67
317.7	4804.99
318	4799.45
318.3	4794.04
318.6	4788.77
318.9	4783.64
319.2	4778.64
319.5	4773.77
319.8	4769.03
320.1	4764.42
320.4	4759.92
320.7	4755.52
321	4751.23
321.3	4747.03
321.6	4742.91
321.9	4738.86
322.2	4734.87
322.5	4730.92
322.8	4727.02
323.1	4723.15
323.4	4719.31
323.7	4715.49
324	4711.7
324.3	4707.93
324.6	4704.19
324.9	4700.5
325.2	4696.86
325.5	4693.28
325.8	4689.78
326.1	4686.38
326.4	4683.1
326.7	4679.95
327	4676.96
327.3	4674.13
327.6	4671.47
327.9	4669
328.2	4666.72
328.5	4664.63
328.8	4662.73
329.1	4661
329.4	4659.42
329.7	4657.98
330	4656.65
330.3	4655.41
330.6	4654.21
330.9	4653.04
331.2	4651.85
331.5	4650.62
331.8	4649.31
332.1	4647.9
332.4	4646.37
332.7	4644.69
333	4642.85
333.3	4640.84
333.6	4638.67
333.9	4636.34
334.2	4633.86
334.5	4631.24
334.8	4628.51
335.1	4625.69
335.4	4622.8
335.7	4619.89
336	4616.97
336.3	4614.09
336.6	4611.28
336.9	4608.57
337.2	4605.98
337.5	4603.55
337.8	4601.3
338.1	4599.24
338.4	4597.4
338.7	4595.78
339	4594.39
339.3	4593.23
339.6	4592.3
339.9	4591.59
340.2	4591.1
340.5	4590.81
340.8	4590.7
341.1	4590.75
341.4	4590.94
341.7	4591.24
342	4591.64
342.3	4592.1
342.6	4592.6
342.9	4593.11
343.2	4593.61
343.5	4594.07
343.8	4594.48
344.1	4594.81
344.4	4595.06
344.7	4595.2
345	4595.23
345.3	4595.15
345.6	4594.94
345.9	4594.62
346.2	4594.18
346.5	4593.63
346.8	4592.98
347.1	4592.23
347.4	4591.41
347.7	4590.52
348	4589.59
348.3	4588.61
348.6	4587.62
348.9	4586.61
349.2	4585.61
349.5	4584.63
349.8	4583.67
350.1	4582.76
350.4	4581.89
350.7	4581.09
351	4580.35
351.3	4579.68
351.6	4579.09
351.9	4578.59
352.2	4578.17
352.5	4577.84
352.8	4577.61
353.1	4577.47
353.4	4577.43
353.7	4577.49
354	4577.65
354.3	4577.9
354.6	4578.25
354.9	4578.69
355.2	4579.23
355.5	4579.86
355.8	4580.58
356.1	4581.38
356.4	4582.27
356.7	4583.24
357	4584.29
357.3	4585.41
357.6	4586.61
357.9	4587.89
358.2	4589.24
358.5	4590.66
358.8	4592.15
359.1	4593.7
359.4	4595.3
359.7	4596.96
360	4598.65
360.3	4600.37
360.6	4602.11
360.9	4603.85
361.2	4605.56
361.5	4607.23
361.8	4608.85
362.1	4610.37
362.4	4611.79
362.7	4613.08
363	4614.22
363.3	4615.2
363.6	4616
363.9	4616.6
364.2	4617.02
364.5	4617.24
364.8	4617.27
365.1	4617.13
365.4	4616.83
365.7	4616.39
366	4615.84
366.3	4615.22
366.6	4614.54
366.9	4613.84
367.2	4613.15
367.5	4612.51
367.8	4611.94
368.1	4611.47
368.4	4611.1
368.7	4610.86
369	4610.76
369.3	4610.79
369.6	4610.96
369.9	4611.26
370.2	4611.67
370.5	4612.17
370.8	4612.76
371.1	4613.42
371.4	4614.11
371.7	4614.84
372	4615.58
372.3	4616.32
372.6	4617.05
372.9	4617.78
373.2	4618.5
373.5	4619.21
373.8	4619.93
374.1	4620.67
374.4	4621.45
374.7	4622.28
375	4623.17
375.3	4624.16
375.6	4625.24
375.9	4626.44
376.2	4627.75
376.5	4629.19
376.8	4630.76
377.1	4632.44
377.4	4634.22
377.7	4636.09
378	4638.02
378.3	4639.99
378.6	4641.96
378.9	4643.91
379.2	4645.8
379.5	4647.6
379.8	4649.29
380.1	4650.83
380.4	4652.2
380.7	4653.4
381	4654.4
381.3	4655.22
381.6	4655.85
381.9	4656.32
382.2	4656.65
382.5	4656.85
382.8	4656.98
383.1	4657.08
383.4	4657.17
383.7	4657.32
384	4657.57
384.3	4657.96
384.6	4658.54
384.9	4659.33
385.2	4660.38
385.5	4661.7
385.8	4663.3
386.1	4665.19
386.4	4667.36
386.7	4669.81
387	4672.49
387.3	4675.39
387.6	4678.46
387.9	4681.66
388.2	4684.94
388.5	4688.25
388.8	4691.54
389.1	4694.77
389.4	4697.9
389.7	4700.87
390	4703.67
390.3	4706.26
390.6	4708.62
390.9	4710.76
391.2	4712.66
391.5	4714.32
391.8	4715.77
392.1	4717.01
392.4	4718.08
392.7	4718.98
393	4719.75
393.3	4720.42
393.6	4721.01
393.9	4721.54
394.2	4722.04
394.5	4722.51
394.8	4722.99
395.1	4723.47
395.4	4723.96
395.7	4724.46
396	4724.98
396.3	4725.5
396.6	4726.04
396.9	4726.58
397.2	4727.11
397.5	4727.63
397.8	4728.14
398.1	4728.64
398.4	4729.12
398.7	4729.58
399	4730.04
399.3	4730.49
399.6	4730.95
399.9	4731.43
400.2	4731.93
400.5	4732.46
400.8	4733.05
401.1	4733.69
401.4	4734.39
401.7	4735.18
402	4736.04
402.3	4736.99
402.6	4738.03
402.9	4739.16
403.2	4740.38
403.5	4741.68
403.8	4743.07
404.1	4744.53
404.4	4746.07
404.7	4747.67
405	4749.33
405.3	4751.04
405.6	4752.8
405.9	4754.6
406.2	4756.43
406.5	4758.28
406.8	4760.15
407.1	4762.04
407.4	4763.94
407.7	4765.84
408	4767.74
408.3	4769.64
408.6	4771.55
408.9	4773.45
409.2	4775.37
409.5	4777.32
409.8	4779.3
410.1	4781.36
410.4	4783.54
410.7	4785.87
411	4788.43
411.3	4791.28
411.6	4794.52
411.9	4798.26
412.2	4802.59
412.5	4807.66
412.8	4813.6
413.1	4820.53
413.4	4828.6
413.7	4837.93
414	4848.66
414.3	4860.88
414.6	4874.66
414.9	4890.06
415.2	4907.08
415.5	4925.69
415.8	4945.8
416.1	4967.29
416.4	4989.97
416.7	5013.6
417	5037.89
417.3	5062.51
417.6	5087.09
417.9	5111.22
418.2	5134.47
418.5	5156.42
418.8	5176.63
419.1	5194.7
419.4	5210.23
419.7	5222.88
420	5232.38
420.3	5238.5
420.6	5241.1
420.9	5240.12
421.2	5235.57
421.5	5227.57
421.8	5216.28
422.1	5201.97
422.4	5184.98
422.7	5165.67
423	5144.49
423.3	5121.89
423.6	5098.33
423.9	5074.31
424.2	5050.27
424.5	5026.65
424.8	5003.86
425.1	4982.22
425.4	4962.03
425.7	4943.52
426	4926.84
426.3	4912.1
426.6	4899.33
426.9	4888.5
427.2	4879.55
427.5	4872.36
427.8	4866.79
428.1	4862.65
428.4	4859.77
428.7	4857.96
429	4857.01
429.3	4856.75
429.6	4857.01
429.9	4857.64
430.2	4858.51
430.5	4859.51
430.8	4860.57
431.1	4861.6
431.4	4862.58
431.7	4863.46
432	4864.22
432.3	4864.86
432.6	4865.37
432.9	4865.74
433.2	4865.98
433.5	4866.07
433.8	4866.03
434.1	4865.85
434.4	4865.51
434.7	4865.01
435	4864.35
435.3	4863.53
435.6	4862.54
435.9	4861.38
436.2	4860.07
436.5	4858.61
436.8	4857.02
437.1	4855.33
437.4	4853.57
437.7	4851.75
438	4849.92
438.3	4848.1
438.6	4846.32
438.9	4844.62
439.2	4843.02
439.5	4841.53
439.8	4840.18
440.1	4838.97
440.4	4837.91
440.7	4837
441	4836.24
441.3	4835.62
441.6	4835.14
441.9	4834.8
442.2	4834.59
442.5	4834.51
442.8	4834.57
443.1	4834.75
443.4	4835.09
443.7	4835.57
444	4836.22
444.3	4837.05
444.6	4838.07
444.9	4839.29
445.2	4840.72
445.5	4842.38
445.8	4844.24
446.1	4846.32
446.4	4848.59
446.7	4851.04
447	4853.64
447.3	4856.35
447.6	4859.13
447.9	4861.94
448.2	4864.73
448.5	4867.45
448.8	4870.04
449.1	4872.46
449.4	4874.66
449.7	4876.59
450	4878.21
450.3	4879.49
450.6	4880.41
450.9	4880.93
451.2	4881.06
451.5	4880.78
451.8	4880.09
452.1	4879.01
452.4	4877.55
452.7	4875.72
453	4873.55
453.3	4871.06
453.6	4868.29
453.9	4865.26
454.2	4862
454.5	4858.56
454.8	4854.96
455.1	4851.24
455.4	4847.43
455.7	4843.56
456	4839.67
456.3	4835.78
456.6	4831.93
456.9	4828.14
457.2	4824.43
457.5	4820.84
457.8	4817.38
458.1	4814.06
458.4	4810.91
458.7	4807.94
459	4805.16
459.3	4802.56
459.6	4800.16
459.9	4797.96
460.2	4795.95
460.5	4794.13
460.8	4792.49
461.1	4791.01
461.4	4789.7
461.7	4788.54
462	4787.51
462.3	4786.61
462.6	4785.83
462.9	4785.15
463.2	4784.56
463.5	4784.06
463.8	4783.63
464.1	4783.27
464.4	4782.97
464.7	4782.72
465	4782.51
465.3	4782.32
465.6	4782.15
465.9	4781.98
466.2	4781.8
466.5	4781.6
466.8	4781.35
467.1	4781.05
467.4	4780.67
467.7	4780.2
468	4779.62
468.3	4778.93
468.6	4778.1
468.9	4777.15
469.2	4776.06
469.5	4774.85
469.8	4773.51
470.1	4772.06
470.4	4770.52
470.7	4768.9
471	4767.24
471.3	4765.55
471.6	4763.87
471.9	4762.2
472.2	4760.59
472.5	4759.05
472.8	4757.59
473.1	4756.22
473.4	4754.95
473.7	4753.76
474	4752.66
474.3	4751.61
474.6	4750.61
474.9	4749.61
475.2	4748.58
475.5	4747.5
475.8	4746.31
476.1	4744.99
476.4	4743.5
476.7	4741.81
477	4739.9
477.3	4737.75
477.6	4735.35
477.9	4732.7
478.2	4729.8
478.5	4726.68
478.8	4723.36
479.1	4719.87
479.4	4716.25
479.7	4712.53
480	4708.78
480.3	4705.04
480.6	4701.34
480.9	4697.76
481.2	4694.32
481.5	4691.07
481.8	4688.04
482.1	4685.28
482.4	4682.79
482.7	4680.61
483	4678.74
483.3	4677.19
483.6	4675.95
483.9	4675.02
484.2	4674.39
484.5	4674.03
484.8	4673.92
485.1	4674.04
485.4	4674.35
485.7	4674.82
486	4675.41
486.3	4676.08
486.6	4676.79
486.9	4677.5
487.2	4678.17
487.5	4678.76
487.8	4679.23
488.1	4679.55
488.4	4679.68
488.7	4679.6
489	4679.28
489.3	4678.72
489.6	4677.89
489.9	4676.8
490.2	4675.45
490.5	4673.85
490.8	4672.03
491.1	4669.99
491.4	4667.78
491.7	4665.41
492	4662.94
492.3	4660.38
492.6	4657.78
492.9	4655.16
493.2	4652.56
493.5	4650
493.8	4647.5
494.1	4645.06
494.4	4642.7
494.7	4640.41
495	4638.19
495.3	4636.02
495.6	4633.89
495.9	4631.78
496.2	4629.67
496.5	4627.53
496.8	4625.36
497.1	4623.13
497.4	4620.84
497.7	4618.49
498	4616.07
498.3	4613.61
498.6	4611.11
498.9	4608.6
499.2	4606.11
499.5	4603.67
499.8	4601.31
500.1	4599.08
500.4	4596.99
500.7	4595.09
501	4593.4
501.3	4591.94
501.6	4590.71
501.9	4589.73
502.2	4588.98
502.5	4588.45
502.8	4588.12
503.1	4587.96
503.4	4587.93
503.7	4588
504	4588.11
504.3	4588.23
504.6	4588.31
504.9	4588.31
505.2	4588.2
505.5	4587.94
505.8	4587.51
506.1	4586.89
506.4	4586.09
506.7	4585.08
507	4583.88
507.3	4582.51
507.6	4580.98
507.9	4579.3
508.2	4577.51
508.5	4575.62
508.8	4573.67
509.1	4571.66
509.4	4569.63
509.7	4567.58
510	4565.54
510.3	4563.49
510.6	4561.45
510.9	4559.42
511.2	4557.38
511.5	4555.33
511.8	4553.26
512.1	4551.16
512.4	4549.02
512.7	4546.82
513	4544.57
513.3	4542.26
513.6	4539.9
513.9	4537.48
514.2	4535.02
514.5	4532.55
514.8	4530.07
515.1	4527.61
515.4	4525.19
515.7	4522.85
516	4520.6
516.3	4518.48
516.6	4516.5
516.9	4514.68
517.2	4513.04
517.5	4511.58
517.8	4510.29
518.1	4509.19
518.4	4508.24
518.7	4507.44
519	4506.76
519.3	4506.17
519.6	4505.63
519.9	4505.12
520.2	4504.6
520.5	4504.05
520.8	4503.42
521.1	4502.71
521.4	4501.89
521.7	4500.95
522	4499.89
522.3	4498.71
522.6	4497.42
522.9	4496.05
523.2	4494.62
523.5	4493.15
523.8	4491.67
524.1	4490.23
524.4	4488.85
524.7	4487.57
525	4486.41
525.3	4485.39
525.6	4484.53
525.9	4483.84
526.2	4483.32
526.5	4482.97
526.8	4482.76
527.1	4482.69
527.4	4482.72
527.7	4482.82
528	4482.96
528.3	4483.1
528.6	4483.21
528.9	4483.25
529.2	4483.18
529.5	4482.99
529.8	4482.64
530.1	4482.11
530.4	4481.39
530.7	4480.47
531	4479.35
531.3	4478.03
531.6	4476.51
531.9	4474.8
532.2	4472.91
532.5	4470.86
532.8	4468.67
533.1	4466.33
533.4	4463.89
533.7	4461.33
534	4458.7
534.3	4455.99
534.6	4453.22
534.9	4450.42
535.2	4447.59
535.5	4444.76
535.8	4441.94
536.1	4439.14
536.4	4436.4
536.7	4433.72
537	4431.13
537.3	4428.65
537.6	4426.3
537.9	4424.09
538.2	4422.04
538.5	4420.15
538.8	4418.45
539.1	4416.92
539.4	4415.57
539.7	4414.4
540	4413.38
540.3	4412.51
540.6	4411.77
540.9	4411.12
541.2	4410.55
541.5	4410.02
541.8	4409.52
542.1	4409.01
542.4	4408.46
542.7	4407.86
543	4407.19
543.3	4406.44
543.6	4405.59
543.9	4404.65
544.2	4403.63
544.5	4402.52
544.8	4401.35
545.1	4400.13
545.4	4398.89
545.7	4397.65
546	4396.44
546.3	4395.27
546.6	4394.18
546.9	4393.19
547.2	4392.33
547.5	4391.6
547.8	4391.01
548.1	4390.58
548.4	4390.31
548.7	4390.19
549	4390.21
549.3	4390.36
549.6	4390.61
549.9	4390.95
550.2	4391.33
550.5	4391.72
550.8	4392.1
551.1	4392.42
551.4	4392.65
551.7	4392.75
552	4392.69
552.3	4392.44
552.6	4391.97
552.9	4391.27
553.2	4390.31
553.5	4389.11
553.8	4387.66
554.1	4385.98
554.4	4384.08
554.7	4381.99
555	4379.75
555.3	4377.4
555.6	4374.98
555.9	4372.54
556.2	4370.15
556.5	4367.83
556.8	4365.64
557.1	4363.62
557.4	4361.81
557.7	4360.23
558	4358.9
558.3	4357.83
558.6	4357.01
558.9	4356.43
559.2	4356.06
559.5	4355.88
559.8	4355.85
560.1	4355.91
560.4	4356.01
560.7	4356.11
561	4356.16
561.3	4356.11
561.6	4355.92
561.9	4355.55
562.2	4354.99
562.5	4354.22
562.8	4353.23
563.1	4352.04
563.4	4350.66
563.7	4349.11
564	4347.44
564.3	4345.68
564.6	4343.87
564.9	4342.06
565.2	4340.28
565.5	4338.58
565.8	4336.99
566.1	4335.54
566.4	4334.24
566.7	4333.11
567	4332.15
567.3	4331.34
567.6	4330.69
567.9	4330.17
568.2	4329.76
568.5	4329.43
568.8	4329.17
569.1	4328.94
569.4	4328.75
569.7	4328.57
570	4328.4
570.3	4328.25
570.6	4328.13
570.9	4328.06
571.2	4328.07
571.5	4328.19
571.8	4328.46
572.1	4328.92
572.4	4329.61
572.7	4330.56
573	4331.81
573.3	4333.37
573.6	4335.26
573.9	4337.49
574.2	4340.04
574.5	4342.89
574.8	4346.01
575.1	4349.37
575.4	4352.89
575.7	4356.52
576	4360.18
576.3	4363.8
576.6	4367.31
576.9	4370.61
577.2	4373.64
577.5	4376.33
577.8	4378.6
578.1	4380.39
578.4	4381.66
578.7	4382.36
579	4382.47
579.3	4381.95
579.6	4380.81
579.9	4379.03
580.2	4376.63
580.5	4373.63
580.8	4370.03
581.1	4365.89
581.4	4361.23
581.7	4356.11
582	4350.55
582.3	4344.63
582.6	4338.4
582.9	4331.91
583.2	4325.23
583.5	4318.43
583.8	4311.56
584.1	4304.71
584.4	4297.93
584.7	4291.3
585	4284.86
585.3	4278.69
585.6	4272.83
585.9	4267.34
586.2	4262.24
586.5	4257.58
586.8	4253.36
587.1	4249.61
587.4	4246.32
587.7	4243.48
588	4241.06
588.3	4239.04
588.6	4237.39
588.9	4236.04
589.2	4234.96
589.5	4234.09
589.8	4233.37
590.1	4232.75
590.4	4232.17
590.7	4231.59
591	4230.96
591.3	4230.24
591.6	4229.41
591.9	4228.44
592.2	4227.32
592.5	4226.04
592.8	4224.6
593.1	4223.01
593.4	4221.29
593.7	4219.45
594	4217.53
594.3	4215.54
594.6	4213.53
594.9	4211.52
595.2	4209.54
595.5	4207.63
595.8	4205.82
596.1	4204.13
596.4	4202.59
596.7	4201.23
597	4200.06
597.3	4199.1
597.6	4198.35
597.9	4197.83
598.2	4197.55
598.5	4197.48
598.8	4197.64
599.1	4198
599.4	4198.56
[truncated: 12,502 more rows]

## Sheet: Site 3-1
Raman shift (cm-1)	count
0	786.651
0.3	787.628
0.6	789.66
0.9	792.782
1.2	797.032
1.5	802.452
1.8	809.085
2.1	816.971
2.4	826.14
2.7	836.607
3	848.364
3.3	861.373
3.6	875.561
3.9	890.811
4.2	906.96
4.5	923.796
4.8	941.059
5.1	958.443
5.4	975.599
5.7	992.148
6	1007.69
6.3	1021.81
6.6	1034.11
6.9	1044.2
7.2	1051.75
7.5	1056.45
7.8	1058.09
8.1	1056.54
8.4	1051.74
8.7	1043.76
9	1032.75
9.3	1018.97
9.6	1002.8
9.9	984.669
10.2	965.124
10.5	944.751
10.8	924.188
11.1	904.09
11.4	885.116
11.7	867.898
12	853.024
12.3	841.017
12.6	832.313
12.9	827.249
13.2	826.051
13.5	828.827
13.8	835.561
14.1	846.118
14.4	860.248
14.7	877.598
15	897.724
15.3	920.107
15.6	944.176
15.9	969.321
16.2	994.921
16.5	1020.36
16.8	1045.06
17.1	1068.46
17.4	1090.09
17.7	1109.53
18	1126.45
18.3	1140.6
18.6	1151.82
18.9	1160.05
19.2	1165.28
19.5	1167.62
19.8	1167.2
20.1	1164.24
20.4	1158.98
20.7	1151.69
21	1142.68
21.3	1132.25
21.6	1120.67
21.9	1108.23
22.2	1095.18
22.5	1081.73
22.8	1068.09
23.1	1054.39
23.4	1040.75
23.7	1027.27
24	1013.98
24.3	1000.91
24.6	988.081
24.9	975.474
25.2	963.078
25.5	950.881
25.8	938.873
26.1	927.059
26.4	915.457
26.7	904.105
27	893.063
27.3	882.414
27.6	872.261
27.9	862.731
28.2	853.964
28.5	846.118
28.8	839.354
29.1	833.84
29.4	829.737
29.7	827.196
30	826.349
30.3	827.306
30.6	830.145
30.9	834.908
31.2	841.598
31.5	850.174
31.8	860.553
32.1	872.604
32.4	886.157
32.7	901.001
33	916.89
33.3	933.553
33.6	950.695
33.9	968.013
34.2	985.2
34.5	1001.96
34.8	1018
35.1	1033.08
35.4	1046.97
35.7	1059.5
36	1070.53
36.3	1079.97
36.6	1087.8
36.9	1094.04
37.2	1098.76
37.5	1102.07
37.8	1104.11
38.1	1105.06
38.4	1105.11
38.7	1104.47
39	1103.32
39.3	1101.86
39.6	1100.24
39.9	1098.61
40.2	1097.05
40.5	1095.62
40.8	1094.33
41.1	1093.16
41.4	1092.05
41.7	1090.88
42	1089.54
42.3	1087.89
42.6	1085.77
42.9	1083.04
43.2	1079.59
43.5	1075.29
43.8	1070.08
44.1	1063.95
44.4	1056.9
44.7	1049.01
45	1040.4
45.3	1031.26
45.6	1021.78
45.9	1012.24
46.2	1002.9
46.5	994.077
46.8	986.064
47.1	979.158
47.4	973.637
47.7	969.743
48	967.678
48.3	967.592
48.6	969.578
48.9	973.666
49.2	979.824
49.5	987.958
49.8	997.916
50.1	1009.5
50.4	1022.45
50.7	1036.5
51	1051.35
51.3	1066.69
51.6	1082.21
51.9	1097.62
52.2	1112.64
52.5	1127.05
52.8	1140.64
53.1	1153.27
53.4	1164.83
53.7	1175.27
54	1184.57
54.3	1192.78
54.6	1199.97
54.9	1206.24
55.2	1211.72
55.5	1216.57
55.8	1220.92
56.1	1224.95
56.4	1228.78
56.7	1232.55
57	1236.38
57.3	1240.35
57.6	1244.52
57.9	1248.93
58.2	1253.58
58.5	1258.47
58.8	1263.54
59.1	1268.75
59.4	1274
59.7	1279.23
60	1284.34
60.3	1289.24
60.6	1293.83
60.9	1298.03
61.2	1301.76
61.5	1304.94
61.8	1307.53
62.1	1309.46
62.4	1310.7
62.7	1311.22
63	1310.99
63.3	1310
63.6	1308.23
63.9	1305.66
64.2	1302.29
64.5	1298.11
64.8	1293.09
65.1	1287.22
65.4	1280.5
65.7	1272.89
66	1264.41
66.3	1255.03
66.6	1244.78
66.9	1233.67
67.2	1221.73
67.5	1209.04
67.8	1195.66
68.1	1181.7
68.4	1167.3
68.7	1152.62
69	1137.85
69.3	1123.19
69.6	1108.9
69.9	1095.22
70.2	1082.41
70.5	1070.74
70.8	1060.48
71.1	1051.87
71.4	1045.16
71.7	1040.54
72	1038.17
72.3	1038.16
72.6	1040.57
72.9	1045.41
73.2	1052.6
73.5	1062.03
73.8	1073.49
74.1	1086.75
74.4	1101.48
74.7	1117.34
75	1133.94
75.3	1150.85
75.6	1167.64
75.9	1183.9
76.2	1199.19
76.5	1213.15
76.8	1225.43
77.1	1235.75
77.4	1243.89
77.7	1249.71
78	1253.16
78.3	1254.27
78.6	1253.14
78.9	1249.97
79.2	1245.03
79.5	1238.65
79.8	1231.23
80.1	1223.21
80.4	1215.05
80.7	1207.22
81	1200.19
81.3	1194.42
81.6	1190.32
81.9	1188.25
82.2	1188.51
82.5	1191.33
82.8	1196.87
83.1	1205.18
83.4	1216.24
83.7	1229.96
84	1246.13
84.3	1264.51
84.6	1284.76
84.9	1306.5
85.2	1329.29
85.5	1352.7
85.8	1376.24
86.1	1399.44
86.4	1421.83
86.7	1442.98
87	1462.48
87.3	1479.98
87.6	1495.17
87.9	1507.82
88.2	1517.76
88.5	1524.89
88.8	1529.18
89.1	1530.67
89.4	1529.5
89.7	1525.83
90	1519.9
90.3	1512
90.6	1502.47
90.9	1491.68
91.2	1479.99
91.5	1467.82
91.8	1455.56
92.1	1443.6
92.4	1432.29
92.7	1421.98
93	1412.95
93.3	1405.45
93.6	1399.66
93.9	1395.73
94.2	1393.74
94.5	1393.69
94.8	1395.56
95.1	1399.27
95.4	1404.69
95.7	1411.67
96	1420.01
96.3	1429.53
96.6	1440.04
96.9	1451.36
97.2	1463.33
97.5	1475.84
97.8	1488.81
98.1	1502.23
98.4	1516.12
98.7	1530.59
99	1545.8
99.3	1561.97
99.6	1579.36
99.9	1598.28
100.2	1619.07
100.5	1642.11
100.8	1667.75
101.1	1696.36
101.4	1728.27
101.7	1763.77
102	1803.11
102.3	1846.48
102.6	1893.97
102.9	1945.62
103.2	2001.4
103.5	2061.17
103.8	2124.75
104.1	2191.89
104.4	2262.27
104.7	2335.56
105	2411.38
105.3	2489.37
105.6	2569.19
105.9	2650.51
106.2	2733.07
106.5	2816.67
106.8	2901.19
107.1	2986.63
107.4	3073.06
107.7	3160.65
108	3249.71
108.3	3340.62
108.6	3433.87
108.9	3530.02
109.2	3629.69
109.5	3733.57
109.8	3842.36
110.1	3956.77
110.4	4077.49
110.7	4205.18
111	4340.43
111.3	4483.75
111.6	4635.55
111.9	4796.11
112.2	4965.58
112.5	5143.98
112.8	5331.16
113.1	5526.82
113.4	5730.52
113.7	5941.65
114	6159.47
114.3	6383.1
114.6	6611.55
114.9	6843.73
115.2	7078.46
115.5	7314.51
115.8	7550.6
116.1	7785.45
116.4	8017.77
116.7	8246.3
117	8469.83
117.3	8687.21
117.6	8897.38
117.9	9099.39
118.2	9292.36
118.5	9475.58
118.8	9648.41
119.1	9810.37
119.4	9961.1
119.7	10100.4
120	10228
120.3	10344
120.6	10448.5
120.9	10541.7
121.2	10623.6
121.5	10694.8
121.8	10755.4
122.1	10805.9
122.4	10846.7
122.7	10878.2
123	10900.8
123.3	10915
123.6	10921.2
123.9	10919.6
124.2	10910.8
124.5	10895.1
124.8	10872.9
125.1	10844.4
125.4	10810.1
125.7	10770.3
126	10725.2
126.3	10675.2
126.6	10620.7
126.9	10562.1
127.2	10499.5
127.5	10433.6
127.8	10364.5
128.1	10292.7
128.4	10218.6
128.7	10142.6
129	10065
129.3	9986.38
129.6	9906.96
129.9	9827.16
130.2	9747.33
130.5	9667.79
130.8	9588.86
131.1	9510.81
131.4	9433.9
131.7	9358.35
132	9284.36
132.3	9212.1
132.6	9141.72
132.9	9073.35
133.2	9007.09
133.5	8943.03
133.8	8881.26
134.1	8821.82
134.4	8764.79
134.7	8710.2
135	8658.09
135.3	8608.5
135.6	8561.46
135.9	8516.99
136.2	8475.1
136.5	8435.8
136.8	8399.09
137.1	8364.95
137.4	8333.36
137.7	8304.28
138	8277.66
138.3	8253.43
138.6	8231.5
138.9	8211.78
139.2	8194.17
139.5	8178.53
139.8	8164.73
140.1	8152.63
140.4	8142.09
140.7	8132.95
141	8125.05
141.3	8118.24
141.6	8112.37
141.9	8107.29
142.2	8102.86
142.5	8098.96
142.8	8095.45
143.1	8092.23
143.4	8089.21
143.7	8086.28
144	8083.38
144.3	8080.43
144.6	8077.38
144.9	8074.2
145.2	8070.84
145.5	8067.27
145.8	8063.49
146.1	8059.48
146.4	8055.24
146.7	8050.77
147	8046.09
147.3	8041.21
147.6	8036.15
147.9	8030.94
148.2	8025.61
148.5	8020.19
148.8	8014.72
149.1	8009.24
149.4	8003.8
149.7	7998.43
150	7993.18
150.3	7988.11
150.6	7983.26
150.9	7978.67
151.2	7974.4
151.5	7970.49
151.8	7966.98
152.1	7963.91
152.4	7961.32
152.7	7959.24
153	7957.71
153.3	7956.75
153.6	7956.38
153.9	7956.63
154.2	7957.51
154.5	7959.03
154.8	7961.21
155.1	7964.06
155.4	7967.58
155.7	7971.78
156	7976.67
156.3	7982.25
156.6	7988.53
156.9	7995.51
157.2	8003.2
157.5	8011.61
157.8	8020.73
158.1	8030.58
158.4	8041.14
158.7	8052.42
159	8064.41
159.3	8077.08
159.6	8090.42
159.9	8104.39
160.2	8118.95
160.5	8134.04
160.8	8149.6
161.1	8165.54
161.4	8181.77
161.7	8198.19
162	8214.67
162.3	8231.1
162.6	8247.34
162.9	8263.24
163.2	8278.66
163.5	8293.44
163.8	8307.44
164.1	8320.51
164.4	8332.51
164.7	8343.32
165	8352.8
165.3	8360.86
165.6	8367.4
165.9	8372.34
166.2	8375.62
166.5	8377.2
166.8	8377.05
167.1	8375.16
167.4	8371.52
167.7	8366.16
168	8359.1
168.3	8350.38
168.6	8340.04
168.9	8328.14
169.2	8314.74
169.5	8299.89
169.8	8283.66
170.1	8266.12
170.4	8247.34
170.7	8227.39
171	8206.35
171.3	8184.27
171.6	8161.25
171.9	8137.37
172.2	8112.69
172.5	8087.32
172.8	8061.34
173.1	8034.85
173.4	8007.94
173.7	7980.71
174	7953.27
174.3	7925.73
174.6	7898.18
174.9	7870.73
175.2	7843.49
175.5	7816.56
175.8	7790.01
176.1	7763.96
176.4	7738.46
176.7	7713.58
177	7689.4
177.3	7665.95
177.6	7643.26
177.9	7621.37
178.2	7600.29
178.5	7580.02
178.8	7560.55
179.1	7541.86
179.4	7523.94
179.7	7506.74
180	7490.23
180.3	7474.36
180.6	7459.09
180.9	7444.37
181.2	7430.13
181.5	7416.33
181.8	7402.91
182.1	7389.82
182.4	7376.98
182.7	7364.36
183	7351.89
183.3	7339.52
183.6	7327.2
183.9	7314.87
184.2	7302.5
184.5	7290.04
184.8	7277.44
185.1	7264.67
185.4	7251.7
185.7	7238.5
186	7225.06
186.3	7211.34
186.6	7197.35
186.9	7183.07
187.2	7168.5
187.5	7153.66
187.8	7138.53
188.1	7123.15
188.4	7107.51
188.7	7091.64
189	7075.56
189.3	7059.28
189.6	7042.83
189.9	7026.21
190.2	7009.45
190.5	6992.56
190.8	6975.55
191.1	6958.43
191.4	6941.2
191.7	6923.88
192	6906.46
192.3	6888.95
192.6	6871.33
192.9	6853.62
193.2	6835.81
193.5	6817.9
193.8	6799.89
194.1	6781.77
194.4	6763.56
194.7	6745.25
195	6726.84
195.3	6708.36
195.6	6689.8
195.9	6671.16
196.2	6652.47
196.5	6633.73
196.8	6614.94
197.1	6596.12
197.4	6577.26
197.7	6558.38
198	6539.47
198.3	6520.55
198.6	6501.6
198.9	6482.63
199.2	6463.62
199.5	6444.59
199.8	6425.52
200.1	6406.42
200.4	6387.26
200.7	6368.06
201	6348.81
201.3	6329.51
201.6	6310.16
201.9	6290.76
202.2	6271.32
202.5	6251.85
202.8	6232.34
203.1	6212.82
203.4	6193.28
203.7	6173.74
204	6154.2
204.3	6134.67
204.6	6115.16
204.9	6095.67
205.2	6076.21
205.5	6056.78
205.8	6037.38
206.1	6018.01
206.4	5998.67
206.7	5979.37
207	5960.1
207.3	5940.86
207.6	5921.66
207.9	5902.5
208.2	5883.4
208.5	5864.35
208.8	5845.37
209.1	5826.47
209.4	5807.67
209.7	5788.97
210	5770.39
210.3	5751.95
210.6	5733.65
210.9	5715.5
211.2	5697.5
211.5	5679.66
211.8	5661.96
212.1	5644.38
212.4	5626.92
212.7	5609.53
213	5592.2
213.3	5574.89
213.6	5557.55
213.9	5540.14
214.2	5522.62
214.5	5504.96
214.8	5487.1
215.1	5469.02
215.4	5450.7
215.7	5432.1
216	5413.22
216.3	5394.07
216.6	5374.65
216.9	5354.98
217.2	5335.1
217.5	5315.05
217.8	5294.87
218.1	5274.63
218.4	5254.38
218.7	5234.19
219	5214.13
219.3	5194.25
219.6	5174.61
219.9	5155.27
220.2	5136.26
220.5	5117.63
220.8	5099.39
221.1	5081.55
221.4	5064.13
221.7	5047.1
222	5030.44
222.3	5014.15
222.6	4998.16
222.9	4982.46
223.2	4967
223.5	4951.73
223.8	4936.62
224.1	4921.62
224.4	4906.71
224.7	4891.85
225	4877.04
225.3	4862.25
225.6	4847.48
225.9	4832.72
226.2	4818
226.5	4803.31
226.8	4788.68
227.1	4774.13
227.4	4759.66
227.7	4745.3
228	4731.06
228.3	4716.96
228.6	4702.98
228.9	4689.15
229.2	4675.44
229.5	4661.85
229.8	4648.36
230.1	4634.94
230.4	4621.57
230.7	4608.21
231	4594.84
231.3	4581.41
231.6	4567.91
231.9	4554.31
232.2	4540.58
232.5	4526.7
232.8	4512.66
233.1	4498.46
233.4	4484.11
233.7	4469.6
234	4454.96
234.3	4440.22
234.6	4425.39
234.9	4410.51
235.2	4395.61
235.5	4380.73
235.8	4365.91
236.1	4351.18
236.4	4336.56
236.7	4322.09
237	4307.8
237.3	4293.69
237.6	4279.79
237.9	4266.09
238.2	4252.6
238.5	4239.32
238.8	4226.22
239.1	4213.31
239.4	4200.54
239.7	4187.91
240	4175.37
240.3	4162.92
240.6	4150.5
240.9	4138.1
241.2	4125.68
241.5	4113.22
241.8	4100.69
242.1	4088.07
242.4	4075.35
242.7	4062.49
243	4049.51
243.3	4036.39
243.6	4023.13
243.9	4009.74
244.2	3996.22
244.5	3982.59
244.8	3968.87
245.1	3955.07
245.4	3941.23
245.7	3927.36
246	3913.5
246.3	3899.67
246.6	3885.9
246.9	3872.22
247.2	3858.66
247.5	3845.24
247.8	3831.98
248.1	3818.9
248.4	3806.01
248.7	3793.32
249	3780.85
249.3	3768.58
249.6	3756.52
249.9	3744.66
250.2	3732.99
250.5	3721.5
250.8	3710.16
251.1	3698.97
251.4	3687.9
251.7	3676.93
252	3666.05
252.3	3655.23
252.6	3644.46
252.9	3633.73
253.2	3623.02
253.5	3612.33
253.8	3601.64
254.1	3590.95
254.4	3580.26
254.7	3569.56
255	3558.86
255.3	3548.16
255.6	3537.46
255.9	3526.76
256.2	3516.05
256.5	3505.35
256.8	3494.65
257.1	3483.94
257.4	3473.23
257.7	3462.51
258	3451.77
258.3	3441.02
258.6	3430.23
258.9	3419.41
259.2	3408.56
259.5	3397.66
259.8	3386.73
260.1	3375.76
260.4	3364.75
260.7	3353.71
261	3342.66
261.3	3331.6
261.6	3320.55
261.9	3309.52
262.2	3298.55
262.5	3287.63
262.8	3276.8
263.1	3266.07
263.4	3255.45
263.7	3244.96
264	3234.61
264.3	3224.41
264.6	3214.34
264.9	3204.42
265.2	3194.63
265.5	3184.97
265.8	3175.4
266.1	3165.93
266.4	3156.51
266.7	3147.14
267	3137.78
267.3	3128.42
267.6	3119.04
267.9	3109.61
268.2	3100.12
268.5	3090.56
268.8	3080.93
269.1	3071.23
269.4	3061.46
269.7	3051.63
270	3041.75
270.3	3031.85
270.6	3021.93
270.9	3012.03
271.2	3002.15
271.5	2992.33
271.8	2982.57
272.1	2972.91
272.4	2963.34
272.7	2953.88
273	2944.54
273.3	2935.31
273.6	2926.18
273.9	2917.16
274.2	2908.24
274.5	2899.39
274.8	2890.61
275.1	2881.87
275.4	2873.18
275.7	2864.5
276	2855.84
276.3	2847.17
276.6	2838.5
276.9	2829.82
277.2	2821.14
277.5	2812.44
277.8	2803.74
278.1	2795.05
278.4	2786.37
278.7	2777.71
279	2769.07
279.3	2760.48
279.6	2751.92
279.9	2743.4
280.2	2734.93
280.5	2726.5
280.8	2718.11
281.1	2709.75
281.4	2701.42
281.7	2693.1
282	2684.79
282.3	2676.48
282.6	2668.16
282.9	2659.83
283.2	2651.48
283.5	2643.11
283.8	2634.74
284.1	2626.36
284.4	2617.99
284.7	2609.64
285	2601.33
285.3	2593.09
285.6	2584.92
285.9	2576.86
286.2	2568.92
286.5	2561.12
286.8	2553.48
287.1	2546.01
287.4	2538.72
287.7	2531.61
288	2524.68
288.3	2517.92
288.6	2511.34
288.9	2504.9
289.2	2498.6
289.5	2492.41
289.8	2486.32
290.1	2480.3
290.4	2474.32
290.7	2468.38
291	2462.44
291.3	2456.49
291.6	2450.53
291.9	2444.53
292.2	2438.5
292.5	2432.44
292.8	2426.34
293.1	2420.22
293.4	2414.08
293.7	2407.94
294	2401.81
294.3	2395.7
294.6	2389.62
294.9	2383.59
295.2	2377.62
295.5	2371.72
295.8	2365.9
296.1	2360.16
296.4	2354.51
296.7	2348.95
297	2343.48
297.3	2338.09
297.6	2332.78
297.9	2327.54
298.2	2322.38
298.5	2317.27
298.8	2312.23
299.1	2307.23
299.4	2302.28
299.7	2297.38
300	2292.52
300.3	2287.71
300.6	2282.94
300.9	2278.22
301.2	2273.56
301.5	2268.95
301.8	2264.4
302.1	2259.92
302.4	2255.51
302.7	2251.17
303	2246.9
303.3	2242.71
303.6	2238.58
303.9	2234.53
304.2	2230.54
304.5	2226.61
304.8	2222.73
305.1	2218.9
305.4	2215.1
305.7	2211.33
306	2207.57
306.3	2203.82
306.6	2200.07
306.9	2196.31
307.2	2192.54
307.5	2188.74
307.8	2184.92
308.1	2181.07
308.4	2177.19
308.7	2173.28
309	2169.34
309.3	2165.37
309.6	2161.38
309.9	2157.37
310.2	2153.35
310.5	2149.32
310.8	2145.3
311.1	2141.28
311.4	2137.29
311.7	2133.34
312	2129.43
312.3	2125.58
312.6	2121.8
312.9	2118.1
313.2	2114.5
313.5	2111.01
313.8	2107.65
314.1	2104.41
314.4	2101.32
314.7	2098.38
315	2095.59
315.3	2092.95
315.6	2090.48
315.9	2088.16
316.2	2085.98
316.5	2083.95
316.8	2082.04
317.1	2080.25
317.4	2078.56
317.7	2076.96
318	2075.43
318.3	2073.94
318.6	2072.5
318.9	2071.07
319.2	2069.66
319.5	2068.24
319.8	2066.81
320.1	2065.36
320.4	2063.89
320.7	2062.39
321	2060.88
321.3	2059.34
321.6	2057.8
321.9	2056.24
322.2	2054.68
322.5	2053.13
322.8	2051.58
323.1	2050.04
323.4	2048.52
323.7	2047.01
324	2045.51
324.3	2044.02
324.6	2042.53
324.9	2041.04
325.2	2039.54
325.5	2038.02
325.8	2036.48
326.1	2034.91
326.4	2033.31
326.7	2031.66
327	2029.97
327.3	2028.25
327.6	2026.48
327.9	2024.68
328.2	2022.86
328.5	2021.02
328.8	2019.17
329.1	2017.33
329.4	2015.49
329.7	2013.69
330	2011.91
330.3	2010.18
330.6	2008.51
330.9	2006.88
331.2	2005.32
331.5	2003.82
331.8	2002.38
332.1	2001.01
332.4	1999.7
332.7	1998.44
333	1997.24
333.3	1996.09
333.6	1995
333.9	1993.95
334.2	1992.97
334.5	1992.03
334.8	1991.16
335.1	1990.36
335.4	1989.63
335.7	1988.98
336	1988.42
336.3	1987.96
336.6	1987.61
336.9	1987.37
337.2	1987.25
337.5	1987.26
337.8	1987.38
338.1	1987.62
338.4	1987.98
338.7	1988.43
339	1988.98
339.3	1989.61
339.6	1990.29
339.9	1991
340.2	1991.74
340.5	1992.46
340.8	1993.15
341.1	1993.79
341.4	1994.35
341.7	1994.82
342	1995.17
342.3	1995.4
342.6	1995.49
342.9	1995.44
343.2	1995.23
343.5	1994.88
343.8	1994.38
344.1	1993.75
344.4	1993
344.7	1992.14
345	1991.19
345.3	1990.17
345.6	1989.1
345.9	1988
346.2	1986.89
346.5	1985.8
346.8	1984.75
347.1	1983.76
347.4	1982.84
347.7	1982.02
348	1981.3
348.3	1980.7
348.6	1980.22
348.9	1979.87
349.2	1979.66
349.5	1979.58
349.8	1979.64
350.1	1979.82
350.4	1980.13
350.7	1980.56
351	1981.1
351.3	1981.73
351.6	1982.46
351.9	1983.26
352.2	1984.12
352.5	1985.04
352.8	1985.99
353.1	1986.96
353.4	1987.93
353.7	1988.9
354	1989.85
354.3	1990.76
354.6	1991.61
354.9	1992.4
355.2	1993.11
355.5	1993.72
355.8	1994.25
356.1	1994.67
356.4	1994.98
356.7	1995.2
357	1995.31
357.3	1995.34
357.6	1995.28
357.9	1995.17
358.2	1995.01
358.5	1994.83
358.8	1994.66
359.1	1994.51
359.4	1994.41
359.7	1994.39
360	1994.46
360.3	1994.65
360.6	1994.97
360.9	1995.43
361.2	1996.04
361.5	1996.79
361.8	1997.67
362.1	1998.68
362.4	1999.8
362.7	2001
363	2002.25
363.3	2003.54
363.6	2004.82
363.9	2006.08
364.2	2007.27
364.5	2008.38
364.8	2009.38
365.1	2010.26
365.4	2010.99
365.7	2011.58
366	2012.03
366.3	2012.33
366.6	2012.5
366.9	2012.55
367.2	2012.5
367.5	2012.37
367.8	2012.18
368.1	2011.96
368.4	2011.72
368.7	2011.49
369	2011.29
369.3	2011.13
369.6	2011.02
369.9	2010.97
370.2	2010.98
370.5	2011.07
370.8	2011.22
371.1	2011.43
371.4	2011.7
371.7	2012.03
372	2012.41
372.3	2012.83
372.6	2013.3
372.9	2013.81
373.2	2014.36
373.5	2014.95
373.8	2015.59
374.1	2016.27
374.4	2017.01
374.7	2017.8
375	2018.64
375.3	2019.55
375.6	2020.51
375.9	2021.52
376.2	2022.57
376.5	2023.66
376.8	2024.77
377.1	2025.88
377.4	2026.98
377.7	2028.05
378	2029.06
378.3	2030.01
378.6	2030.86
378.9	2031.62
379.2	2032.26
379.5	2032.77
379.8	2033.17
380.1	2033.45
380.4	2033.61
380.7	2033.68
381	2033.67
381.3	2033.6
381.6	2033.5
381.9	2033.41
382.2	2033.34
382.5	2033.33
382.8	2033.41
383.1	2033.6
383.4	2033.94
383.7	2034.42
384	2035.07
384.3	2035.9
384.6	2036.9
384.9	2038.06
385.2	2039.38
385.5	2040.83
385.8	2042.4
386.1	2044.05
386.4	2045.75
386.7	2047.48
387	2049.19
387.3	2050.87
387.6	2052.47
387.9	2053.98
388.2	2055.37
388.5	2056.63
388.8	2057.75
389.1	2058.72
389.4	2059.54
389.7	2060.23
390	2060.8
390.3	2061.26
390.6	2061.63
390.9	2061.95
391.2	2062.23
391.5	2062.51
391.8	2062.8
392.1	2063.14
392.4	2063.54
392.7	2064.02
393	2064.59
393.3	2065.25
393.6	2066
393.9	2066.84
394.2	2067.76
394.5	2068.74
394.8	2069.75
395.1	2070.78
395.4	2071.81
395.7	2072.8
396	2073.72
396.3	2074.57
396.6	2075.32
396.9	2075.96
397.2	2076.48
397.5	2076.87
397.8	2077.15
398.1	2077.32
398.4	2077.4
398.7	2077.42
399	2077.4
399.3	2077.37
399.6	2077.37
399.9	2077.42
400.2	2077.57
400.5	2077.84
400.8	2078.25
401.1	2078.84
401.4	2079.61
401.7	2080.57
402	2081.71
402.3	2083.04
402.6	2084.53
402.9	2086.15
403.2	2087.89
403.5	2089.7
403.8	2091.54
404.1	2093.37
404.4	2095.16
404.7	2096.85
405	2098.4
405.3	2099.79
405.6	2100.99
405.9	2101.97
406.2	2102.71
406.5	2103.21
406.8	2103.48
407.1	2103.53
407.4	2103.37
407.7	2103.04
408	2102.58
408.3	2102.03
408.6	2101.44
408.9	2100.88
409.2	2100.4
409.5	2100.07
409.8	2099.95
410.1	2100.12
410.4	2100.63
410.7	2101.56
411	2102.95
411.3	2104.86
411.6	2107.35
411.9	2110.44
412.2	2114.17
412.5	2118.55
412.8	2123.61
413.1	2129.32
413.4	2135.69
413.7	2142.67
414	2150.22
414.3	2158.28
414.6	2166.79
414.9	2175.67
415.2	2184.8
415.5	2194.1
415.8	2203.44
416.1	2212.7
416.4	2221.76
416.7	2230.48
417	2238.75
417.3	2246.44
417.6	2253.43
417.9	2259.61
418.2	2264.9
418.5	2269.21
418.8	2272.48
419.1	2274.67
419.4	2275.77
419.7	2275.76
420	2274.67
420.3	2272.54
420.6	2269.43
420.9	2265.43
421.2	2260.62
421.5	2255.12
421.8	2249.05
422.1	2242.54
422.4	2235.71
422.7	2228.7
423	2221.64
423.3	2214.64
423.6	2207.84
423.9	2201.32
424.2	2195.17
424.5	2189.48
424.8	2184.3
425.1	2179.67
425.4	2175.62
425.7	2172.15
426	2169.25
426.3	2166.92
426.6	2165.1
426.9	2163.77
427.2	2162.86
427.5	2162.33
427.8	2162.1
428.1	2162.12
428.4	2162.32
428.7	2162.64
429	2163.02
429.3	2163.42
429.6	2163.79
429.9	2164.09
430.2	2164.3
430.5	2164.38
430.8	2164.32
431.1	2164.12
431.4	2163.77
431.7	2163.28
432	2162.66
432.3	2161.91
432.6	2161.07
432.9	2160.14
433.2	2159.15
433.5	2158.13
433.8	2157.08
434.1	2156.03
434.4	2155.01
434.7	2154.03
435	2153.1
435.3	2152.24
435.6	2151.46
435.9	2150.78
436.2	2150.19
436.5	2149.71
436.8	2149.34
437.1	2149.07
437.4	2148.92
437.7	2148.86
438	2148.91
438.3	2149.06
438.6	2149.3
438.9	2149.62
439.2	2150.01
439.5	2150.46
439.8	2150.97
440.1	2151.51
440.4	2152.09
440.7	2152.68
441	2153.28
441.3	2153.88
441.6	2154.46
441.9	2155.03
442.2	2155.57
442.5	2156.09
442.8	2156.57
443.1	2157.03
443.4	2157.47
443.7	2157.9
444	2158.33
444.3	2158.76
444.6	2159.21
444.9	2159.7
445.2	2160.24
445.5	2160.85
445.8	2161.52
446.1	2162.29
446.4	2163.14
446.7	2164.09
447	2165.12
447.3	2166.25
447.6	2167.44
447.9	2168.69
448.2	2169.98
448.5	2171.28
448.8	2172.56
449.1	2173.8
449.4	2174.97
449.7	2176.03
450	2176.96
450.3	2177.74
450.6	2178.33
450.9	2178.73
451.2	2178.93
451.5	2178.93
451.8	2178.71
452.1	2178.31
452.4	2177.72
452.7	2176.97
453	2176.08
453.3	2175.09
453.6	2174.02
453.9	2172.89
454.2	2171.75
454.5	2170.61
454.8	2169.5
455.1	2168.43
455.4	2167.43
455.7	2166.49
456	2165.62
456.3	2164.81
456.6	2164.06
456.9	2163.35
457.2	2162.67
457.5	2162
457.8	2161.32
458.1	2160.62
458.4	2159.88
458.7	2159.09
459	2158.24
459.3	2157.33
459.6	2156.36
459.9	2155.35
460.2	2154.29
460.5	2153.21
460.8	2152.14
461.1	2151.08
461.4	2150.07
461.7	2149.12
462	2148.27
462.3	2147.54
462.6	2146.93
462.9	2146.46
463.2	2146.15
463.5	2145.99
463.8	2145.99
464.1	2146.12
464.4	2146.39
464.7	2146.77
465	2147.25
465.3	2147.8
465.6	2148.4
465.9	2149.02
466.2	2149.64
466.5	2150.25
466.8	2150.82
467.1	2151.33
467.4	2151.78
467.7	2152.16
468	2152.47
468.3	2152.7
468.6	2152.86
468.9	2152.96
469.2	2153.01
469.5	2153.02
469.8	2153
470.1	2152.97
470.4	2152.94
470.7	2152.93
471	2152.93
471.3	2152.96
471.6	2153.03
471.9	2153.13
472.2	2153.27
472.5	2153.44
472.8	2153.63
473.1	2153.84
473.4	2154.05
473.7	2154.24
474	2154.41
474.3	2154.54
474.6	2154.6
474.9	2154.6
475.2	2154.5
475.5	2154.31
475.8	2154.01
476.1	2153.58
476.4	2153.04
476.7	2152.38
477	2151.6
477.3	2150.71
477.6	2149.72
477.9	2148.64
478.2	2147.5
478.5	2146.31
478.8	2145.09
479.1	2143.86
479.4	2142.66
479.7	2141.49
480	2140.38
480.3	2139.35
480.6	2138.41
480.9	2137.57
481.2	2136.85
481.5	2136.23
481.8	2135.73
482.1	2135.34
482.4	2135.04
482.7	2134.83
483	2134.69
483.3	2134.59
483.6	2134.53
483.9	2134.47
484.2	2134.41
484.5	2134.31
484.8	2134.18
485.1	2133.99
485.4	2133.73
485.7	2133.4
486	2132.99
486.3	2132.5
486.6	2131.94
486.9	2131.31
487.2	2130.61
487.5	2129.86
487.8	2129.07
488.1	2128.23
488.4	2127.36
488.7	2126.47
489	2125.56
489.3	2124.63
489.6	2123.69
489.9	2122.73
490.2	2121.76
490.5	2120.77
490.8	2119.75
491.1	2118.71
491.4	2117.64
491.7	2116.54
492	2115.42
492.3	2114.27
492.6	2113.09
492.9	2111.9
493.2	2110.69
493.5	2109.48
493.8	2108.27
494.1	2107.07
494.4	2105.89
494.7	2104.73
495	2103.59
495.3	2102.49
495.6	2101.42
495.9	2100.37
496.2	2099.34
496.5	2098.33
496.8	2097.32
497.1	2096.31
497.4	2095.29
497.7	2094.23
498	2093.14
498.3	2092
498.6	2090.82
498.9	2089.58
499.2	2088.28
499.5	2086.94
499.8	2085.56
500.1	2084.14
500.4	2082.71
500.7	2081.28
501	2079.87
501.3	2078.49
501.6	2077.16
501.9	2075.91
502.2	2074.75
502.5	2073.68
502.8	2072.74
503.1	2071.92
503.4	2071.23
503.7	2070.67
504	2070.24
504.3	2069.94
504.6	2069.76
504.9	2069.69
505.2	2069.73
505.5	2069.85
505.8	2070.06
506.1	2070.33
506.4	2070.65
506.7	2071.01
507	2071.39
507.3	2071.77
507.6	2072.16
507.9	2072.52
508.2	2072.84
508.5	2073.11
508.8	2073.32
509.1	2073.44
509.4	2073.47
509.7	2073.39
510	2073.18
510.3	2072.84
510.6	2072.36
510.9	2071.73
511.2	2070.95
511.5	2070.02
511.8	2068.95
512.1	2067.75
512.4	2066.42
512.7	2065
513	2063.5
513.3	2061.95
513.6	2060.36
513.9	2058.78
514.2	2057.22
514.5	2055.7
514.8	2054.26
515.1	2052.9
515.4	2051.65
515.7	2050.51
516	2049.49
516.3	2048.58
516.6	2047.79
516.9	2047.08
517.2	2046.47
517.5	2045.91
517.8	2045.4
518.1	2044.92
518.4	2044.44
518.7	2043.95
519	2043.43
519.3	2042.87
519.6	2042.26
519.9	2041.61
520.2	2040.92
520.5	2040.18
520.8	2039.42
521.1	2038.65
521.4	2037.88
521.7	2037.14
522	2036.44
522.3	2035.81
522.6	2035.25
522.9	2034.78
523.2	2034.42
523.5	2034.16
523.8	2034.01
524.1	2033.97
524.4	2034.02
524.7	2034.15
525	2034.35
525.3	2034.6
525.6	2034.88
525.9	2035.16
526.2	2035.42
526.5	2035.64
526.8	2035.8
527.1	2035.88
527.4	2035.87
527.7	2035.76
528	2035.54
528.3	2035.21
528.6	2034.77
528.9	2034.22
529.2	2033.58
529.5	2032.85
529.8	2032.04
530.1	2031.18
530.4	2030.28
530.7	2029.35
531	2028.41
531.3	2027.46
531.6	2026.54
531.9	2025.63
532.2	2024.76
532.5	2023.92
532.8	2023.12
533.1	2022.36
533.4	2021.65
533.7	2020.97
534	2020.32
534.3	2019.7
534.6	2019.1
534.9	2018.51
535.2	2017.94
535.5	2017.38
535.8	2016.83
536.1	2016.28
536.4	2015.74
536.7	2015.22
537	2014.71
537.3	2014.22
537.6	2013.76
537.9	2013.34
538.2	2012.96
538.5	2012.64
538.8	2012.37
539.1	2012.16
539.4	2012.02
539.7	2011.93
540	2011.91
540.3	2011.94
540.6	2012.02
540.9	2012.13
541.2	2012.26
541.5	2012.39
541.8	2012.52
542.1	2012.62
542.4	2012.68
542.7	2012.68
543	2012.62
543.3	2012.48
543.6	2012.26
543.9	2011.96
544.2	2011.58
544.5	2011.12
544.8	2010.6
545.1	2010.02
545.4	2009.41
545.7	2008.76
546	2008.11
546.3	2007.47
546.6	2006.85
546.9	2006.26
547.2	2005.73
547.5	2005.25
547.8	2004.83
548.1	2004.48
548.4	2004.18
548.7	2003.94
549	2003.76
549.3	2003.61
549.6	2003.49
549.9	2003.39
550.2	2003.3
550.5	2003.21
550.8	2003.12
551.1	2003.01
551.4	2002.89
551.7	2002.75
552	2002.6
552.3	2002.44
552.6	2002.28
552.9	2002.13
553.2	2002
553.5	2001.88
553.8	2001.8
554.1	2001.75
554.4	2001.73
554.7	2001.75
555	2001.79
555.3	2001.85
555.6	2001.91
555.9	2001.97
556.2	2001.99
556.5	2001.97
556.8	2001.88
557.1	2001.69
557.4	2001.4
557.7	2000.98
558	2000.42
558.3	1999.72
558.6	1998.86
558.9	1997.85
559.2	1996.69
559.5	1995.4
559.8	1993.98
560.1	1992.47
560.4	1990.88
560.7	1989.23
561	1987.56
561.3	1985.89
561.6	1984.24
561.9	1982.64
562.2	1981.11
562.5	1979.67
562.8	1978.32
563.1	1977.07
563.4	1975.93
563.7	1974.89
564	1973.96
564.3	1973.11
564.6	1972.35
564.9	1971.67
565.2	1971.04
565.5	1970.45
565.8	1969.91
566.1	1969.39
566.4	1968.89
566.7	1968.41
567	1967.94
567.3	1967.5
567.6	1967.07
567.9	1966.68
568.2	1966.33
568.5	1966.04
568.8	1965.8
569.1	1965.64
569.4	1965.56
569.7	1965.58
570	1965.7
570.3	1965.93
570.6	1966.26
570.9	1966.7
571.2	1967.25
571.5	1967.89
571.8	1968.62
572.1	1969.44
572.4	1970.32
572.7	1971.25
573	1972.22
573.3	1973.21
573.6	1974.21
573.9	1975.2
574.2	1976.17
574.5	1977.1
574.8	1977.98
575.1	1978.81
575.4	1979.56
575.7	1980.24
576	1980.83
576.3	1981.33
576.6	1981.73
576.9	1982.04
577.2	1982.25
577.5	1982.36
577.8	1982.37
578.1	1982.28
578.4	1982.09
578.7	1981.79
579	1981.4
579.3	1980.9
579.6	1980.3
579.9	1979.59
580.2	1978.77
580.5	1977.84
580.8	1976.8
581.1	1975.63
581.4	1974.33
581.7	1972.91
582	1971.34
582.3	1969.64
582.6	1967.78
582.9	1965.78
583.2	1963.63
583.5	1961.34
583.8	1958.9
584.1	1956.33
584.4	1953.63
584.7	1950.83
585	1947.93
585.3	1944.97
585.6	1941.96
585.9	1938.93
586.2	1935.91
586.5	1932.92
586.8	1929.99
587.1	1927.15
587.4	1924.43
587.7	1921.85
588	1919.43
588.3	1917.18
588.6	1915.11
588.9	1913.25
589.2	1911.58
589.5	1910.11
589.8	1908.83
590.1	1907.74
590.4	1906.83
590.7	1906.07
591	1905.46
591.3	1904.98
591.6	1904.61
591.9	1904.33
592.2	1904.14
592.5	1904.01
592.8	1903.94
593.1	1903.91
593.4	1903.92
593.7	1903.96
594	1904.02
594.3	1904.11
594.6	1904.22
594.9	1904.35
595.2	1904.5
595.5	1904.68
595.8	1904.88
596.1	1905.1
596.4	1905.34
596.7	1905.61
597	1905.89
597.3	1906.19
597.6	1906.5
597.9	1906.83
598.2	1907.15
598.5	1907.48
598.8	1907.8
599.1	1908.12
599.4	1908.42
[truncated: 12,502 more rows]

## Sheet: Site 3-2
Raman shift (cm-1)	count
0	1000.3
0.3	980.151
0.6	960.576
0.9	941.983
1.2	924.723
1.5	909.094
1.8	895.32
2.1	883.55
2.4	873.853
2.7	866.211
3	860.527
3.3	856.628
3.6	854.274
3.9	853.168
4.2	852.974
4.5	853.333
4.8	853.879
5.1	854.261
5.4	854.159
5.7	853.304
6	851.49
6.3	848.592
6.6	844.568
6.9	839.471
7.2	833.446
7.5	826.729
7.8	819.633
8.1	812.543
8.4	805.892
8.7	800.148
9	795.788
9.3	793.276
9.6	793.04
9.9	795.452
10.2	800.802
10.5	809.287
10.8	820.995
11.1	835.892
11.4	853.827
11.7	874.526
12	897.602
12.3	922.568
12.6	948.85
12.9	975.813
13.2	1002.78
13.5	1029.06
13.8	1053.97
14.1	1076.88
14.4	1097.2
14.7	1114.44
15	1128.21
15.3	1138.24
15.6	1144.38
15.9	1146.62
16.2	1145.08
16.5	1139.99
16.8	1131.7
17.1	1120.66
17.4	1107.39
17.7	1092.47
18	1076.5
18.3	1060.09
18.6	1043.85
18.9	1028.33
19.2	1014.03
19.5	1001.36
19.8	990.665
20.1	982.174
20.4	976.023
20.7	972.244
21	970.775
21.3	971.46
21.6	974.071
21.9	978.312
22.2	983.843
22.5	990.29
22.8	997.268
23.1	1004.4
23.4	1011.31
23.7	1017.68
24	1023.22
24.3	1027.7
24.6	1030.94
24.9	1032.85
25.2	1033.37
25.5	1032.52
25.8	1030.37
26.1	1027.05
26.4	1022.72
26.7	1017.58
27	1011.85
27.3	1005.75
27.6	999.525
27.9	993.387
28.2	987.547
28.5	982.189
28.8	977.468
29.1	973.506
29.4	970.389
29.7	968.167
30	966.853
30.3	966.428
30.6	966.841
30.9	968.015
31.2	969.853
31.5	972.238
31.8	975.046
32.1	978.147
32.4	981.41
32.7	984.711
33	987.935
33.3	990.982
33.6	993.769
33.9	996.23
34.2	998.322
34.5	1000.02
34.8	1001.33
35.1	1002.26
35.4	1002.86
35.7	1003.16
36	1003.24
36.3	1003.17
36.6	1003.02
36.9	1002.89
37.2	1002.83
37.5	1002.94
37.8	1003.27
38.1	1003.88
38.4	1004.81
38.7	1006.1
39	1007.74
39.3	1009.76
39.6	1012.13
39.9	1014.82
40.2	1017.81
40.5	1021.05
40.8	1024.49
41.1	1028.09
41.4	1031.8
41.7	1035.58
42	1039.38
42.3	1043.18
42.6	1046.95
42.9	1050.68
43.2	1054.36
43.5	1058.01
43.8	1061.62
44.1	1065.2
44.4	1068.78
44.7	1072.35
45	1075.92
45.3	1079.5
45.6	1083.07
45.9	1086.6
46.2	1090.06
46.5	1093.41
46.8	1096.59
47.1	1099.52
47.4	1102.14
47.7	1104.38
48	1106.16
48.3	1107.41
48.6	1108.09
48.9	1108.15
49.2	1107.57
49.5	1106.35
49.8	1104.53
50.1	1102.15
50.4	1099.29
50.7	1096.04
51	1092.52
51.3	1088.84
51.6	1085.14
51.9	1081.54
52.2	1078.16
52.5	1075.09
52.8	1072.42
53.1	1070.18
53.4	1068.38
53.7	1066.99
54	1065.93
54.3	1065.09
54.6	1064.34
54.9	1063.47
55.2	1062.31
55.5	1060.64
55.8	1058.24
56.1	1054.93
56.4	1050.53
56.7	1044.9
57	1037.97
57.3	1029.7
57.6	1020.13
57.9	1009.38
58.2	997.627
58.5	985.129
58.8	972.203
59.1	959.223
59.4	946.608
59.7	934.808
60	924.281
60.3	915.483
60.6	908.843
60.9	904.746
61.2	903.517
61.5	905.404
61.8	910.566
62.1	919.061
62.4	930.845
62.7	945.765
63	963.568
63.3	983.901
63.6	1006.33
63.9	1030.35
64.2	1055.39
64.5	1080.88
64.8	1106.19
65.1	1130.73
65.4	1153.95
65.7	1175.3
66	1194.36
66.3	1210.73
66.6	1224.14
66.9	1234.4
67.2	1241.43
67.5	1245.24
67.8	1245.94
68.1	1243.74
68.4	1238.89
68.7	1231.73
69	1222.65
69.3	1212.05
69.6	1200.35
69.9	1187.99
70.2	1175.35
70.5	1162.83
70.8	1150.75
71.1	1139.42
71.4	1129.07
71.7	1119.87
72	1111.96
72.3	1105.4
72.6	1100.22
72.9	1096.4
73.2	1093.87
73.5	1092.54
73.8	1092.3
74.1	1093.02
74.4	1094.54
74.7	1096.74
75	1099.48
75.3	1102.61
75.6	1106.02
75.9	1109.59
76.2	1113.23
76.5	1116.84
76.8	1120.34
77.1	1123.68
77.4	1126.79
77.7	1129.64
78	1132.17
78.3	1134.35
78.6	1136.17
78.9	1137.58
79.2	1138.59
79.5	1139.18
79.8	1139.35
80.1	1139.11
80.4	1138.46
80.7	1137.43
81	1136.06
81.3	1134.38
81.6	1132.42
81.9	1130.26
82.2	1127.92
82.5	1125.49
82.8	1123
83.1	1120.51
83.4	1118.08
83.7	1115.73
84	1113.52
84.3	1111.45
84.6	1109.56
84.9	1107.83
85.2	1106.28
85.5	1104.9
85.8	1103.66
86.1	1102.55
86.4	1101.55
86.7	1100.64
87	1099.82
87.3	1099.08
87.6	1098.41
87.9	1097.84
88.2	1097.38
88.5	1097.08
88.8	1096.97
89.1	1097.11
89.4	1097.57
89.7	1098.42
90	1099.72
90.3	1101.56
90.6	1104
90.9	1107.11
91.2	1110.97
91.5	1115.62
91.8	1121.12
92.1	1127.52
92.4	1134.83
92.7	1143.09
93	1152.31
93.3	1162.49
93.6	1173.65
93.9	1185.77
94.2	1198.83
94.5	1212.83
94.8	1227.73
95.1	1243.52
95.4	1260.14
95.7	1277.57
96	1295.74
96.3	1314.6
96.6	1334.09
96.9	1354.12
97.2	1374.62
97.5	1395.49
97.8	1416.63
98.1	1437.96
98.4	1459.37
98.7	1480.78
99	1502.11
99.3	1523.32
99.6	1544.38
99.9	1565.29
100.2	1586.09
100.5	1606.89
100.8	1627.81
101.1	1649.06
101.4	1670.87
101.7	1693.56
102	1717.48
102.3	1743.02
102.6	1770.64
102.9	1800.82
103.2	1834.04
103.5	1870.83
103.8	1911.69
104.1	1957.12
104.4	2007.6
104.7	2063.55
105	2125.37
105.3	2193.36
105.6	2267.8
105.9	2348.87
106.2	2436.68
106.5	2531.27
106.8	2632.61
107.1	2740.6
107.4	2855.07
107.7	2975.83
108	3102.62
108.3	3235.15
108.6	3373.15
108.9	3516.29
109.2	3664.29
109.5	3816.86
109.8	3973.73
110.1	4134.66
110.4	4299.44
110.7	4467.89
111	4639.85
111.3	4815.2
111.6	4993.83
111.9	5175.64
112.2	5360.54
112.5	5548.42
112.8	5739.16
113.1	5932.63
113.4	6128.65
113.7	6326.99
114	6527.4
114.3	6729.55
114.6	6933.06
114.9	7137.5
115.2	7342.38
115.5	7547.16
115.8	7751.24
116.1	7953.99
116.4	8154.75
116.7	8352.82
117	8547.49
117.3	8738.05
117.6	8923.8
117.9	9104.04
118.2	9278.1
118.5	9445.35
118.8	9605.19
119.1	9757.08
119.4	9900.52
119.7	10035.1
120	10160.4
120.3	10276.2
120.6	10382.1
120.9	10478.2
121.2	10564.1
121.5	10640
121.8	10705.8
122.1	10761.7
122.4	10807.7
122.7	10844.1
123	10871.1
123.3	10889.1
123.6	10898.4
123.9	10899.3
124.2	10892.3
124.5	10877.8
124.8	10856.2
125.1	10828
125.4	10793.8
125.7	10753.8
126	10708.7
126.3	10658.8
126.6	10604.7
126.9	10546.7
127.2	10485.3
127.5	10420.8
127.8	10353.8
128.1	10284.4
128.4	10213.1
128.7	10140.2
129	10066
129.3	9990.74
129.6	9914.75
129.9	9838.26
130.2	9761.54
130.5	9684.83
130.8	9608.35
131.1	9532.33
131.4	9457
131.7	9382.55
132	9309.2
132.3	9237.13
132.6	9166.54
132.9	9097.6
133.2	9030.46
133.5	8965.28
133.8	8902.18
134.1	8841.27
134.4	8782.65
134.7	8726.39
135	8672.55
135.3	8621.16
135.6	8572.24
135.9	8525.8
136.2	8481.8
136.5	8440.24
136.8	8401.06
137.1	8364.23
137.4	8329.67
137.7	8297.34
138	8267.16
138.3	8239.07
138.6	8213.01
138.9	8188.9
139.2	8166.68
139.5	8146.29
139.8	8127.64
140.1	8110.69
140.4	8095.34
140.7	8081.54
141	8069.19
141.3	8058.22
141.6	8048.52
141.9	8040
142.2	8032.55
142.5	8026.07
142.8	8020.42
143.1	8015.49
143.4	8011.15
143.7	8007.29
144	8003.77
144.3	8000.48
144.6	7997.31
144.9	7994.16
145.2	7990.95
145.5	7987.6
145.8	7984.07
146.1	7980.3
146.4	7976.29
146.7	7972.03
147	7967.54
147.3	7962.83
147.6	7957.96
147.9	7952.99
148.2	7947.96
148.5	7942.96
148.8	7938.05
149.1	7933.31
149.4	7928.8
149.7	7924.58
150	7920.71
150.3	7917.24
150.6	7914.21
150.9	7911.64
151.2	7909.55
151.5	7907.94
151.8	7906.81
152.1	7906.14
152.4	7905.93
152.7	7906.14
153	7906.76
153.3	7907.75
153.6	7909.09
153.9	7910.75
154.2	7912.73
154.5	7915.01
154.8	7917.57
155.1	7920.44
155.4	7923.6
155.7	7927.09
156	7930.93
156.3	7935.13
156.6	7939.74
156.9	7944.8
157.2	7950.33
157.5	7956.39
157.8	7962.99
158.1	7970.18
158.4	7977.98
158.7	7986.41
159	7995.48
159.3	8005.18
159.6	8015.5
159.9	8026.43
160.2	8037.92
160.5	8049.92
160.8	8062.38
161.1	8075.22
161.4	8088.36
161.7	8101.71
162	8115.15
162.3	8128.6
162.6	8141.92
162.9	8155.01
163.2	8167.73
163.5	8179.98
163.8	8191.62
164.1	8202.54
164.4	8212.64
164.7	8221.79
165	8229.89
165.3	8236.87
165.6	8242.61
165.9	8247.06
166.2	8250.13
166.5	8251.77
166.8	8251.92
167.1	8250.54
167.4	8247.6
167.7	8243.06
168	8236.91
168.3	8229.14
168.6	8219.74
168.9	8208.73
169.2	8196.1
169.5	8181.9
169.8	8166.14
170.1	8148.88
170.4	8130.17
170.7	8110.07
171	8088.65
171.3	8066.01
171.6	8042.23
171.9	8017.44
172.2	7991.75
172.5	7965.28
172.8	7938.18
173.1	7910.58
173.4	7882.63
173.7	7854.48
174	7826.27
174.3	7798.16
174.6	7770.27
174.9	7742.75
175.2	7715.7
175.5	7689.23
175.8	7663.45
176.1	7638.41
176.4	7614.18
176.7	7590.8
177	7568.29
177.3	7546.66
177.6	7525.89
177.9	7505.96
178.2	7486.84
178.5	7468.46
178.8	7450.78
179.1	7433.73
179.4	7417.23
179.7	7401.23
180	7385.66
180.3	7370.44
180.6	7355.51
180.9	7340.83
181.2	7326.33
181.5	7311.98
181.8	7297.74
182.1	7283.59
182.4	7269.49
182.7	7255.43
183	7241.4
183.3	7227.39
183.6	7213.39
183.9	7199.4
184.2	7185.39
184.5	7171.38
184.8	7157.35
185.1	7143.29
185.4	7129.18
185.7	7115.01
186	7100.77
186.3	7086.42
186.6	7071.96
186.9	7057.37
187.2	7042.61
187.5	7027.67
187.8	7012.53
188.1	6997.18
188.4	6981.6
188.7	6965.78
189	6949.72
189.3	6933.42
189.6	6916.88
189.9	6900.1
190.2	6883.11
190.5	6865.91
190.8	6848.52
191.1	6830.96
191.4	6813.26
191.7	6795.44
192	6777.52
192.3	6759.51
192.6	6741.45
192.9	6723.35
193.2	6705.22
193.5	6687.08
193.8	6668.93
194.1	6650.77
194.4	6632.61
194.7	6614.45
195	6596.27
195.3	6578.06
195.6	6559.82
195.9	6541.53
196.2	6523.19
196.5	6504.77
196.8	6486.27
197.1	6467.67
197.4	6448.98
197.7	6430.2
198	6411.32
198.3	6392.35
198.6	6373.3
198.9	6354.2
199.2	6335.05
199.5	6315.88
199.8	6296.72
200.1	6277.6
200.4	6258.53
200.7	6239.56
201	6220.7
201.3	6201.98
201.6	6183.42
201.9	6165.02
202.2	6146.82
202.5	6128.8
202.8	6110.97
203.1	6093.32
203.4	6075.84
203.7	6058.52
204	6041.33
204.3	6024.25
204.6	6007.25
204.9	5990.31
205.2	5973.4
205.5	5956.49
205.8	5939.54
206.1	5922.55
206.4	5905.48
206.7	5888.31
207	5871.04
207.3	5853.63
207.6	5836.09
207.9	5818.41
208.2	5800.58
208.5	5782.59
208.8	5764.46
209.1	5746.16
209.4	5727.71
209.7	5709.11
210	5690.36
210.3	5671.46
210.6	5652.41
210.9	5633.23
211.2	5613.9
211.5	5594.45
211.8	5574.88
212.1	5555.2
212.4	5535.43
212.7	5515.58
213	5495.68
213.3	5475.75
213.6	5455.82
213.9	5435.92
214.2	5416.08
214.5	5396.34
214.8	5376.72
215.1	5357.25
215.4	5337.98
215.7	5318.92
216	5300.11
216.3	5281.54
216.6	5263.25
216.9	5245.23
217.2	5227.47
217.5	5209.98
217.8	5192.73
218.1	5175.71
218.4	5158.88
218.7	5142.21
219	5125.68
219.3	5109.24
219.6	5092.85
219.9	5076.5
220.2	5060.13
220.5	5043.73
220.8	5027.27
221.1	5010.74
221.4	4994.12
221.7	4977.41
222	4960.61
222.3	4943.74
222.6	4926.8
222.9	4909.82
223.2	4892.82
223.5	4875.82
223.8	4858.86
224.1	4841.95
224.4	4825.13
224.7	4808.41
225	4791.82
225.3	4775.37
225.6	4759.07
225.9	4742.93
226.2	4726.94
226.5	4711.12
226.8	4695.44
227.1	4679.9
227.4	4664.48
227.7	4649.18
228	4633.96
228.3	4618.82
228.6	4603.75
228.9	4588.72
229.2	4573.73
229.5	4558.76
229.8	4543.82
230.1	4528.91
230.4	4514.01
230.7	4499.14
231	4484.31
231.3	4469.52
231.6	4454.79
231.9	4440.13
232.2	4425.55
232.5	4411.07
232.8	4396.7
233.1	4382.45
233.4	4368.33
233.7	4354.34
234	4340.51
234.3	4326.82
234.6	4313.29
234.9	4299.9
235.2	4286.66
235.5	4273.56
235.8	4260.58
236.1	4247.72
236.4	4234.95
236.7	4222.27
237	4209.65
237.3	4197.07
237.6	4184.51
237.9	4171.95
238.2	4159.35
238.5	4146.71
238.8	4133.99
239.1	4121.17
239.4	4108.23
239.7	4095.16
240	4081.94
240.3	4068.57
240.6	4055.03
240.9	4041.33
241.2	4027.47
241.5	4013.47
241.8	3999.33
242.1	3985.09
242.4	3970.77
242.7	3956.41
243	3942.03
243.3	3927.67
243.6	3913.38
243.9	3899.18
244.2	3885.12
244.5	3871.22
244.8	3857.52
245.1	3844.03
245.4	3830.77
245.7	3817.75
246	3804.97
246.3	3792.42
246.6	3780.09
246.9	3767.95
247.2	3755.97
247.5	3744.12
247.8	3732.37
248.1	3720.69
248.4	3709.02
248.7	3697.34
249	3685.63
249.3	3673.84
249.6	3661.97
249.9	3650
250.2	3637.93
250.5	3625.77
250.8	3613.51
251.1	3601.19
251.4	3588.83
251.7	3576.46
252	3564.1
252.3	3551.8
252.6	3539.59
252.9	3527.5
253.2	3515.55
253.5	3503.78
253.8	3492.19
254.1	3480.8
254.4	3469.61
254.7	3458.61
255	3447.79
255.3	3437.13
255.6	3426.61
255.9	3416.2
256.2	3405.85
256.5	3395.55
256.8	3385.25
257.1	3374.92
257.4	3364.54
257.7	3354.08
258	3343.52
258.3	3332.86
258.6	3322.07
258.9	3311.17
259.2	3300.16
259.5	3289.05
259.8	3277.87
260.1	3266.63
260.4	3255.36
260.7	3244.09
261	3232.84
261.3	3221.65
261.6	3210.54
261.9	3199.52
262.2	3188.63
262.5	3177.87
262.8	3167.26
263.1	3156.81
263.4	3146.5
263.7	3136.35
264	3126.35
264.3	3116.48
264.6	3106.75
264.9	3097.12
265.2	3087.6
265.5	3078.15
265.8	3068.78
266.1	3059.47
266.4	3050.2
266.7	3040.97
267	3031.76
267.3	3022.58
267.6	3013.41
267.9	3004.26
268.2	2995.13
268.5	2986.02
268.8	2976.93
269.1	2967.86
269.4	2958.83
269.7	2949.83
270	2940.88
270.3	2931.97
270.6	2923.11
270.9	2914.29
271.2	2905.53
271.5	2896.8
271.8	2888.12
272.1	2879.47
272.4	2870.84
272.7	2862.22
273	2853.6
273.3	2844.97
273.6	2836.3
273.9	2827.59
274.2	2818.81
274.5	2809.97
274.8	2801.03
275.1	2791.99
275.4	2782.86
275.7	2773.61
276	2764.25
276.3	2754.79
276.6	2745.24
276.9	2735.61
277.2	2725.91
277.5	2716.17
277.8	2706.42
278.1	2696.68
278.4	2686.98
278.7	2677.36
279	2667.85
279.3	2658.48
279.6	2649.27
279.9	2640.26
280.2	2631.46
280.5	2622.89
280.8	2614.56
281.1	2606.47
281.4	2598.63
281.7	2591.02
282	2583.63
282.3	2576.45
282.6	2569.44
282.9	2562.58
283.2	2555.83
283.5	2549.17
283.8	2542.56
284.1	2535.96
284.4	2529.35
284.7	2522.7
285	2515.99
285.3	2509.19
285.6	2502.29
285.9	2495.28
286.2	2488.17
286.5	2480.95
286.8	2473.63
287.1	2466.23
287.4	2458.76
287.7	2451.24
288	2443.7
288.3	2436.15
288.6	2428.62
288.9	2421.14
289.2	2413.73
289.5	2406.4
289.8	2399.17
290.1	2392.06
290.4	2385.08
290.7	2378.23
291	2371.52
291.3	2364.93
291.6	2358.48
291.9	2352.15
292.2	2345.92
292.5	2339.8
292.8	2333.75
293.1	2327.77
293.4	2321.83
293.7	2315.92
294	2310.03
294.3	2304.13
294.6	2298.21
294.9	2292.26
295.2	2286.26
295.5	2280.22
295.8	2274.12
296.1	2267.96
296.4	2261.74
296.7	2255.46
297	2249.14
297.3	2242.78
297.6	2236.39
297.9	2229.99
298.2	2223.59
298.5	2217.22
298.8	2210.89
299.1	2204.63
299.4	2198.44
299.7	2192.36
300	2186.39
300.3	2180.55
300.6	2174.85
300.9	2169.3
301.2	2163.91
301.5	2158.67
301.8	2153.58
302.1	2148.65
302.4	2143.85
302.7	2139.19
303	2134.63
303.3	2130.17
303.6	2125.79
303.9	2121.48
304.2	2117.21
304.5	2112.97
304.8	2108.75
305.1	2104.53
305.4	2100.32
305.7	2096.1
306	2091.88
306.3	2087.65
306.6	2083.42
306.9	2079.21
307.2	2075.01
307.5	2070.85
307.8	2066.73
308.1	2062.67
308.4	2058.68
308.7	2054.78
309	2050.97
309.3	2047.25
309.6	2043.65
309.9	2040.15
310.2	2036.76
310.5	2033.47
310.8	2030.27
311.1	2027.17
311.4	2024.15
311.7	2021.2
312	2018.31
312.3	2015.46
312.6	2012.66
312.9	2009.89
313.2	2007.15
313.5	2004.43
313.8	2001.74
314.1	1999.06
314.4	1996.41
314.7	1993.8
315	1991.21
315.3	1988.68
315.6	1986.2
315.9	1983.77
316.2	1981.42
316.5	1979.14
316.8	1976.94
317.1	1974.83
317.4	1972.8
317.7	1970.85
318	1968.98
318.3	1967.19
318.6	1965.45
318.9	1963.78
319.2	1962.15
319.5	1960.55
319.8	1958.98
320.1	1957.42
320.4	1955.86
320.7	1954.29
321	1952.7
321.3	1951.09
321.6	1949.45
321.9	1947.79
322.2	1946.09
322.5	1944.36
322.8	1942.61
323.1	1940.84
323.4	1939.04
323.7	1937.24
324	1935.42
324.3	1933.6
324.6	1931.78
324.9	1929.96
325.2	1928.15
325.5	1926.35
325.8	1924.55
326.1	1922.75
326.4	1920.96
326.7	1919.17
327	1917.37
327.3	1915.57
327.6	1913.77
327.9	1911.95
328.2	1910.12
328.5	1908.28
328.8	1906.44
329.1	1904.59
329.4	1902.75
329.7	1900.91
330	1899.09
330.3	1897.29
330.6	1895.54
330.9	1893.83
331.2	1892.19
331.5	1890.61
331.8	1889.12
332.1	1887.72
332.4	1886.42
332.7	1885.22
333	1884.14
333.3	1883.16
333.6	1882.3
333.9	1881.54
334.2	1880.89
334.5	1880.33
334.8	1879.86
335.1	1879.46
335.4	1879.13
335.7	1878.85
336	1878.6
336.3	1878.39
336.6	1878.2
336.9	1878.01
337.2	1877.83
337.5	1877.65
337.8	1877.46
338.1	1877.26
338.4	1877.05
338.7	1876.84
339	1876.64
339.3	1876.44
339.6	1876.25
339.9	1876.08
340.2	1875.94
340.5	1875.84
340.8	1875.77
341.1	1875.74
341.4	1875.76
341.7	1875.82
342	1875.93
342.3	1876.07
342.6	1876.24
342.9	1876.43
343.2	1876.63
343.5	1876.84
343.8	1877.04
344.1	1877.22
344.4	1877.37
344.7	1877.48
345	1877.54
345.3	1877.55
345.6	1877.5
345.9	1877.4
346.2	1877.24
346.5	1877.02
346.8	1876.76
347.1	1876.46
347.4	1876.13
347.7	1875.78
348	1875.42
348.3	1875.06
348.6	1874.7
348.9	1874.37
349.2	1874.06
349.5	1873.78
349.8	1873.54
350.1	1873.33
350.4	1873.17
350.7	1873.04
351	1872.95
351.3	1872.89
351.6	1872.87
351.9	1872.87
352.2	1872.9
352.5	1872.95
352.8	1873.02
353.1	1873.11
353.4	1873.21
353.7	1873.33
354	1873.48
354.3	1873.64
354.6	1873.83
354.9	1874.04
355.2	1874.28
355.5	1874.55
355.8	1874.84
356.1	1875.15
356.4	1875.49
356.7	1875.83
357	1876.19
357.3	1876.54
357.6	1876.89
357.9	1877.21
358.2	1877.5
358.5	1877.74
358.8	1877.94
359.1	1878.08
359.4	1878.14
359.7	1878.14
360	1878.07
360.3	1877.93
360.6	1877.72
360.9	1877.45
361.2	1877.13
361.5	1876.78
361.8	1876.4
362.1	1876.01
362.4	1875.63
362.7	1875.28
363	1874.97
363.3	1874.71
363.6	1874.53
363.9	1874.43
364.2	1874.43
364.5	1874.53
364.8	1874.74
365.1	1875.07
365.4	1875.51
365.7	1876.07
366	1876.75
366.3	1877.54
366.6	1878.44
366.9	1879.44
367.2	1880.54
367.5	1881.73
367.8	1883
368.1	1884.33
368.4	1885.73
368.7	1887.18
369	1888.67
369.3	1890.18
369.6	1891.69
369.9	1893.2
370.2	1894.69
370.5	1896.14
370.8	1897.53
371.1	1898.85
371.4	1900.07
371.7	1901.19
372	1902.18
372.3	1903.05
372.6	1903.78
372.9	1904.37
373.2	1904.81
373.5	1905.12
373.8	1905.29
374.1	1905.36
374.4	1905.33
374.7	1905.24
375	1905.1
375.3	1904.94
375.6	1904.8
375.9	1904.7
376.2	1904.69
376.5	1904.78
376.8	1905
377.1	1905.37
377.4	1905.91
377.7	1906.64
378	1907.54
378.3	1908.63
378.6	1909.9
378.9	1911.32
379.2	1912.88
379.5	1914.55
379.8	1916.3
380.1	1918.11
380.4	1919.94
380.7	1921.74
381	1923.5
381.3	1925.18
381.6	1926.74
381.9	1928.18
382.2	1929.46
382.5	1930.57
382.8	1931.5
383.1	1932.25
383.4	1932.82
383.7	1933.23
384	1933.47
384.3	1933.57
384.6	1933.54
384.9	1933.41
385.2	1933.2
385.5	1932.93
385.8	1932.62
386.1	1932.3
386.4	1931.99
386.7	1931.72
387	1931.48
387.3	1931.31
387.6	1931.21
387.9	1931.19
388.2	1931.26
388.5	1931.42
388.8	1931.67
389.1	1932.01
389.4	1932.43
389.7	1932.94
390	1933.51
390.3	1934.15
390.6	1934.84
390.9	1935.58
391.2	1936.34
391.5	1937.13
391.8	1937.93
392.1	1938.73
392.4	1939.52
392.7	1940.29
393	1941.04
393.3	1941.75
393.6	1942.43
393.9	1943.06
394.2	1943.65
394.5	1944.18
394.8	1944.67
395.1	1945.11
395.4	1945.5
395.7	1945.85
396	1946.16
396.3	1946.44
396.6	1946.69
396.9	1946.92
397.2	1947.15
397.5	1947.37
397.8	1947.59
398.1	1947.84
398.4	1948.11
398.7	1948.42
399	1948.77
399.3	1949.18
399.6	1949.65
399.9	1950.2
400.2	1950.82
400.5	1951.53
400.8	1952.32
401.1	1953.2
401.4	1954.16
401.7	1955.22
402	1956.36
402.3	1957.57
402.6	1958.86
402.9	1960.21
403.2	1961.61
403.5	1963.05
403.8	1964.52
404.1	1966
404.4	1967.49
404.7	1968.96
405	1970.41
405.3	1971.81
405.6	1973.18
405.9	1974.48
406.2	1975.71
406.5	1976.87
406.8	1977.95
407.1	1978.96
407.4	1979.89
407.7	1980.74
408	1981.54
408.3	1982.28
408.6	1982.98
408.9	1983.67
409.2	1984.37
409.5	1985.11
409.8	1985.91
410.1	1986.83
410.4	1987.89
410.7	1989.15
411	1990.64
411.3	1992.44
411.6	1994.57
411.9	1997.11
412.2	2000.08
412.5	2003.55
412.8	2007.56
413.1	2012.13
413.4	2017.28
413.7	2023.05
414	2029.41
414.3	2036.36
414.6	2043.87
414.9	2051.88
415.2	2060.33
415.5	2069.14
415.8	2078.2
416.1	2087.41
416.4	2096.63
416.7	2105.73
417	2114.56
417.3	2122.98
417.6	2130.84
417.9	2138.01
418.2	2144.35
418.5	2149.74
418.8	2154.09
419.1	2157.31
419.4	2159.35
419.7	2160.18
420	2159.79
420.3	2158.2
420.6	2155.45
420.9	2151.62
421.2	2146.79
421.5	2141.08
421.8	2134.6
422.1	2127.51
422.4	2119.92
422.7	2112
423	2103.89
423.3	2095.73
423.6	2087.64
423.9	2079.76
424.2	2072.18
424.5	2065
424.8	2058.3
425.1	2052.13
425.4	2046.54
425.7	2041.55
426	2037.18
426.3	2033.42
426.6	2030.26
426.9	2027.69
427.2	2025.66
427.5	2024.14
427.8	2023.1
428.1	2022.49
428.4	2022.25
428.7	2022.34
429	2022.72
429.3	2023.34
429.6	2024.14
429.9	2025.08
430.2	2026.11
430.5	2027.19
430.8	2028.28
431.1	2029.32
431.4	2030.29
431.7	2031.13
432	2031.83
432.3	2032.34
432.6	2032.65
432.9	2032.73
433.2	2032.56
433.5	2032.15
433.8	2031.48
434.1	2030.57
434.4	2029.43
434.7	2028.08
435	2026.55
435.3	2024.88
435.6	2023.09
435.9	2021.24
436.2	2019.37
436.5	2017.53
436.8	2015.76
437.1	2014.1
437.4	2012.6
437.7	2011.29
438	2010.2
438.3	2009.36
438.6	2008.78
438.9	2008.47
439.2	2008.44
439.5	2008.69
439.8	2009.19
440.1	2009.94
440.4	2010.92
440.7	2012.1
441	2013.45
441.3	2014.94
441.6	2016.55
441.9	2018.24
442.2	2019.99
442.5	2021.77
442.8	2023.55
443.1	2025.32
443.4	2027.05
443.7	2028.75
444	2030.38
444.3	2031.95
444.6	2033.46
444.9	2034.89
445.2	2036.26
445.5	2037.55
445.8	2038.78
446.1	2039.94
446.4	2041.03
446.7	2042.06
447	2043.02
447.3	2043.91
447.6	2044.73
447.9	2045.48
448.2	2046.14
448.5	2046.72
448.8	2047.2
449.1	2047.58
449.4	2047.85
449.7	2048.01
450	2048.04
450.3	2047.95
450.6	2047.74
450.9	2047.4
451.2	2046.93
451.5	2046.34
451.8	2045.64
452.1	2044.84
452.4	2043.93
452.7	2042.95
453	2041.89
453.3	2040.78
453.6	2039.62
453.9	2038.44
454.2	2037.23
454.5	2036.02
454.8	2034.82
455.1	2033.62
455.4	2032.45
455.7	2031.31
456	2030.2
456.3	2029.13
456.6	2028.09
456.9	2027.08
457.2	2026.12
457.5	2025.18
457.8	2024.28
458.1	2023.41
458.4	2022.56
458.7	2021.74
459	2020.95
459.3	2020.17
459.6	2019.41
459.9	2018.67
460.2	2017.95
460.5	2017.24
460.8	2016.54
461.1	2015.85
461.4	2015.18
461.7	2014.51
462	2013.85
462.3	2013.19
462.6	2012.54
462.9	2011.89
463.2	2011.24
463.5	2010.6
463.8	2009.97
464.1	2009.34
464.4	2008.73
464.7	2008.14
465	2007.57
465.3	2007.03
465.6	2006.52
465.9	2006.07
466.2	2005.66
466.5	2005.31
466.8	2005.03
467.1	2004.82
467.4	2004.68
467.7	2004.62
468	2004.64
468.3	2004.72
468.6	2004.88
468.9	2005.11
469.2	2005.39
469.5	2005.71
469.8	2006.06
470.1	2006.44
470.4	2006.82
470.7	2007.19
471	2007.54
471.3	2007.85
471.6	2008.1
471.9	2008.29
472.2	2008.4
472.5	2008.43
472.8	2008.36
473.1	2008.18
473.4	2007.9
473.7	2007.5
474	2006.99
474.3	2006.37
474.6	2005.64
474.9	2004.79
475.2	2003.85
475.5	2002.81
475.8	2001.69
476.1	2000.49
476.4	1999.22
476.7	1997.9
477	1996.55
477.3	1995.16
477.6	1993.77
477.9	1992.38
478.2	1991
478.5	1989.66
478.8	1988.37
479.1	1987.13
479.4	1985.95
479.7	1984.86
480	1983.84
480.3	1982.91
480.6	1982.07
480.9	1981.32
481.2	1980.65
481.5	1980.06
481.8	1979.54
482.1	1979.1
482.4	1978.71
482.7	1978.37
483	1978.07
483.3	1977.8
483.6	1977.56
483.9	1977.34
484.2	1977.13
484.5	1976.93
484.8	1976.75
485.1	1976.57
485.4	1976.4
485.7	1976.24
486	1976.1
486.3	1975.98
486.6	1975.88
486.9	1975.8
487.2	1975.74
487.5	1975.71
487.8	1975.7
488.1	1975.71
488.4	1975.73
488.7	1975.74
489	1975.75
489.3	1975.74
489.6	1975.7
489.9	1975.61
490.2	1975.46
490.5	1975.24
490.8	1974.93
491.1	1974.54
491.4	1974.04
491.7	1973.44
492	1972.73
492.3	1971.91
492.6	1971
492.9	1969.98
493.2	1968.89
493.5	1967.72
493.8	1966.5
494.1	1965.24
494.4	1963.97
494.7	1962.7
495	1961.45
495.3	1960.24
495.6	1959.1
495.9	1958.03
496.2	1957.07
496.5	1956.21
496.8	1955.47
497.1	1954.85
497.4	1954.36
497.7	1953.99
498	1953.75
498.3	1953.61
498.6	1953.57
498.9	1953.61
499.2	1953.71
499.5	1953.84
499.8	1953.99
500.1	1954.12
500.4	1954.21
500.7	1954.24
501	1954.17
501.3	1953.99
501.6	1953.69
501.9	1953.23
502.2	1952.62
502.5	1951.86
502.8	1950.93
503.1	1949.86
503.4	1948.66
503.7	1947.33
504	1945.91
504.3	1944.43
504.6	1942.92
504.9	1941.4
505.2	1939.92
505.5	1938.5
505.8	1937.17
506.1	1935.97
506.4	1934.92
506.7	1934.03
507	1933.31
507.3	1932.77
507.6	1932.41
507.9	1932.21
508.2	1932.16
508.5	1932.23
508.8	1932.41
509.1	1932.64
509.4	1932.91
509.7	1933.18
510	1933.41
510.3	1933.58
510.6	1933.64
510.9	1933.58
511.2	1933.37
511.5	1933.01
511.8	1932.49
512.1	1931.8
512.4	1930.96
512.7	1929.97
513	1928.86
513.3	1927.64
513.6	1926.34
513.9	1925
514.2	1923.63
514.5	1922.27
514.8	1920.94
515.1	1919.68
515.4	1918.49
515.7	1917.4
516	1916.42
516.3	1915.56
516.6	1914.82
516.9	1914.2
517.2	1913.7
517.5	1913.29
517.8	1912.97
518.1	1912.73
518.4	1912.55
518.7	1912.4
519	1912.26
519.3	1912.13
519.6	1911.98
519.9	1911.79
520.2	1911.56
520.5	1911.26
520.8	1910.89
521.1	1910.43
521.4	1909.89
521.7	1909.25
522	1908.53
522.3	1907.71
522.6	1906.8
522.9	1905.8
523.2	1904.72
523.5	1903.56
523.8	1902.34
524.1	1901.06
524.4	1899.72
524.7	1898.35
525	1896.94
525.3	1895.52
525.6	1894.1
525.9	1892.68
526.2	1891.29
526.5	1889.92
526.8	1888.61
527.1	1887.36
527.4	1886.18
527.7	1885.08
528	1884.08
528.3	1883.18
528.6	1882.39
528.9	1881.72
529.2	1881.16
529.5	1880.72
529.8	1880.4
530.1	1880.19
530.4	1880.08
530.7	1880.07
531	1880.14
531.3	1880.28
531.6	1880.47
531.9	1880.7
532.2	1880.96
532.5	1881.22
532.8	1881.46
533.1	1881.69
533.4	1881.87
533.7	1881.99
534	1882.05
534.3	1882.04
534.6	1881.95
534.9	1881.78
535.2	1881.53
535.5	1881.2
535.8	1880.8
536.1	1880.33
536.4	1879.8
536.7	1879.23
537	1878.63
537.3	1878.01
537.6	1877.38
537.9	1876.77
538.2	1876.18
538.5	1875.62
538.8	1875.11
539.1	1874.66
539.4	1874.27
539.7	1873.95
540	1873.71
540.3	1873.54
540.6	1873.44
540.9	1873.41
541.2	1873.44
541.5	1873.53
541.8	1873.67
542.1	1873.85
542.4	1874.06
542.7	1874.29
543	1874.53
543.3	1874.78
543.6	1875.01
543.9	1875.23
544.2	1875.42
544.5	1875.59
544.8	1875.71
545.1	1875.79
545.4	1875.83
545.7	1875.8
546	1875.72
546.3	1875.57
546.6	1875.35
546.9	1875.05
547.2	1874.66
547.5	1874.19
547.8	1873.62
548.1	1872.95
548.4	1872.17
548.7	1871.28
549	1870.29
549.3	1869.19
549.6	1867.98
549.9	1866.68
550.2	1865.29
550.5	1863.83
550.8	1862.32
551.1	1860.77
551.4	1859.22
551.7	1857.68
552	1856.18
552.3	1854.76
552.6	1853.43
552.9	1852.23
553.2	1851.17
553.5	1850.27
553.8	1849.55
554.1	1849.01
554.4	1848.66
554.7	1848.48
555	1848.48
555.3	1848.61
555.6	1848.88
555.9	1849.23
556.2	1849.64
556.5	1850.08
556.8	1850.5
557.1	1850.86
557.4	1851.13
557.7	1851.28
558	1851.27
558.3	1851.08
558.6	1850.69
558.9	1850.1
559.2	1849.29
559.5	1848.29
559.8	1847.09
560.1	1845.72
560.4	1844.2
560.7	1842.58
561	1840.87
561.3	1839.12
561.6	1837.37
561.9	1835.65
562.2	1834.02
562.5	1832.49
562.8	1831.1
563.1	1829.88
563.4	1828.86
563.7	1828.04
564	1827.44
564.3	1827.06
564.6	1826.9
564.9	1826.96
565.2	1827.22
565.5	1827.67
565.8	1828.28
566.1	1829.04
566.4	1829.92
566.7	1830.9
567	1831.94
567.3	1833.03
567.6	1834.12
567.9	1835.21
568.2	1836.27
568.5	1837.27
568.8	1838.21
569.1	1839.06
569.4	1839.82
569.7	1840.48
570	1841.03
570.3	1841.48
570.6	1841.84
570.9	1842.11
571.2	1842.3
571.5	1842.42
571.8	1842.5
572.1	1842.55
572.4	1842.59
572.7	1842.64
573	1842.72
573.3	1842.84
573.6	1843.02
573.9	1843.27
574.2	1843.61
574.5	1844.02
574.8	1844.52
575.1	1845.09
575.4	1845.74
575.7	1846.43
576	1847.16
576.3	1847.9
576.6	1848.62
576.9	1849.29
577.2	1849.88
577.5	1850.35
577.8	1850.68
578.1	1850.83
578.4	1850.76
578.7	1850.47
579	1849.92
579.3	1849.1
579.6	1848
579.9	1846.62
580.2	1844.96
580.5	1843.04
580.8	1840.87
581.1	1838.47
581.4	1835.89
581.7	1833.14
582	1830.29
582.3	1827.35
582.6	1824.39
582.9	1821.44
583.2	1818.54
583.5	1815.74
583.8	1813.07
584.1	1810.57
584.4	1808.24
584.7	1806.12
585	1804.2
585.3	1802.51
585.6	1801.02
585.9	1799.73
586.2	1798.62
586.5	1797.67
586.8	1796.85
587.1	1796.14
587.4	1795.5
587.7	1794.9
588	1794.32
588.3	1793.73
588.6	1793.11
588.9	1792.45
589.2	1791.72
589.5	1790.93
589.8	1790.07
590.1	1789.16
590.4	1788.19
590.7	1787.18
591	1786.16
591.3	1785.14
591.6	1784.13
591.9	1783.17
592.2	1782.27
592.5	1781.44
592.8	1780.7
593.1	1780.06
593.4	1779.53
593.7	1779.1
594	1778.77
594.3	1778.53
594.6	1778.37
594.9	1778.28
595.2	1778.24
595.5	1778.22
595.8	1778.21
596.1	1778.18
596.4	1778.12
596.7	1778.01
597	1777.83
597.3	1777.57
597.6	1777.22
597.9	1776.79
598.2	1776.26
598.5	1775.64
598.8	1774.95
599.1	1774.18
599.4	1773.37
[truncated: 12,502 more rows]

[truncated: 36 more sheets: Site 3-3, Site 4-1, Site 4-2, Site 4-3, Site 4-4, Site 5-1, Site 5-2, Site 5-3, Site 5-4, Site 6-1, Site 6-2, Site 6-3, Site 7-1, Site 7-2, Site 7-3, Site 8-1, Site 8-2, Site 8-3, Site 8-4, Site 9-1 …]
